# Supplementary material for: Visible-Light, Iodine-Promoted Formation of N-Sulfonyl Imines and N-Alkylsulfonamides from Aldehydes and Hypervalent Iodine Reagents
Source: PubMed Central journal article supplement (PMC6222766; doi:10.3390/molecules23081838), 2018-07-24

## Experimental Supporting Information

### **Visible-Light, Iodine-Promoted Formation of *N*-Sulfonyl Imines and *N*-Alkylsulfonamides from Aldehydes and Hypervalent Iodine Reagents**

Megan D. Hopkins, Zachary C. Brandeburg, Andrew J. Hanson, and Angus A. Lamar\*

Department of Chemistry and Biochemistry, The University of Tulsa, 800 S. Tucker Dr., Tulsa, OK 74104, USA.

[angus-lamar@utulsa.edu](mailto:angus-lamar@utulsa.edu)

#### Index

|                                                                               |     |
|-------------------------------------------------------------------------------|-----|
| General information - LED chamber                                             | S-1 |
| Table of <i>N</i> -sulfonyl imine C-H peaks                                   | S-2 |
| Characterization of compounds                                                 | S-2 |
| <sup>1</sup> H and <sup>13</sup> C NMR Spectra of <i>N</i> -alkylsulfonamides | S-8 |

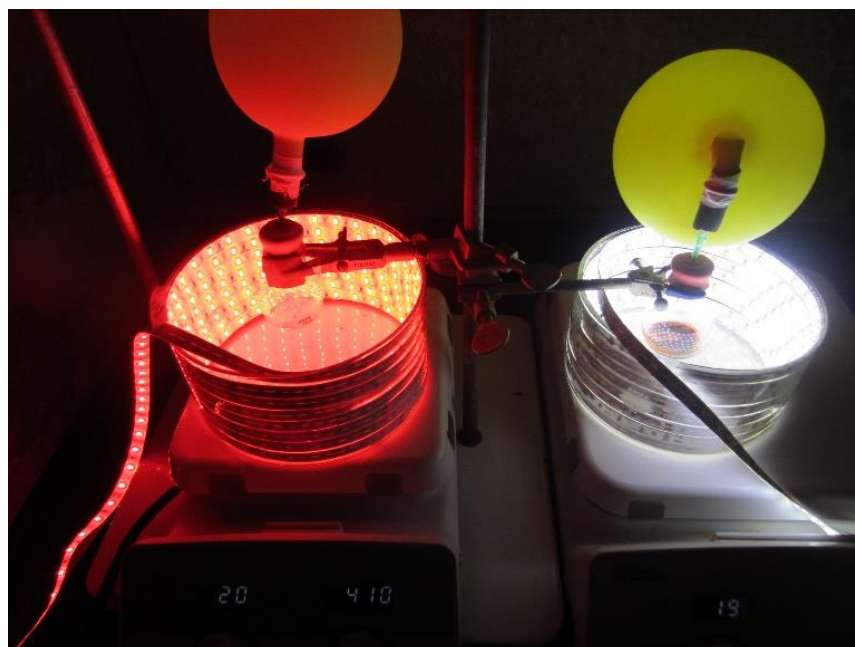

On the left – A red LED strip (620 nm) light bath reaction vessel

On the right – A white LED strip (cool white) light bath reaction vessel

Photocatalytic reactions were set up in a light bath which was constructed in our laboratory as follows. Waterproof 5050 LED strips (12V with power adapter, 18 LEDs/foot, approximately 0.24 Watt per LED – 72 Watt per strip) are coiled around the interior of evaporating dish (170mm x 90mm) using the adhesive backing of the LED strip. A Petri dish (150 x 20 mm) is placed upside down at the bottom of the dish to serve as an elevated glass “floor” to ensure that a round-bottom flask receives maximum light exposure. The temperature inside the dish is monitored and is generally maintained (air-cooled) between 19-22 °C (the temperature has not been observed above 25 °C).

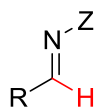

$\delta$  imine C-H (ppm)

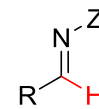

$\delta$  imine C-H (ppm)

| Product | NMR intgn crude | lit. (ref.) | Product | NMR intgn crude | lit. (ref.) |
|---------|-----------------|-------------|---------|-----------------|-------------|
| 2aa     | 8.92            | 8.91 (1)    | 2bb     | 9.04            | 9.03 (3)    |
| 2ba     | 8.97            | 8.96 (1)    | 2eb     | 9.01            | 9.02 (3)    |
| 2ca     | 9.02            | 9.01 (1)    | 2hb     | 9.36            | 9.38 (4)    |
| 2da     | 8.93            | 8.94 (1)    | 2bc     | 8.98            | 8.93 (1)    |
| 2ea     | 8.94            | 8.96 (1)    | 2dc     | 8.99            | 8.95 (1)    |
| 2fa     | 9.07            | 9.07 (1)    | 2bd     | 9.13            | -           |
| 2ga     | 9.01            | 9.01 (1)    | 2ae     | 8.97            | 8.98 (1)    |
| 2ha     | 8.97            | 8.97 (1)    | 2ee     | 9.04            | 9.04 (1)    |
| 2ia     | 9.31            | 9.30 (1)    | 2bf     | 9.06            | -           |
| 2ja     | 8.95            | 8.94 (1)    | 2bg     | 8.98            | 9.04 (2)    |
| 2ka     | 9.49            | 9.48 (1)    | 2de     | 9.09            | 9.09 (1)    |
| 2la     | 8.92            | 8.92 (1)    |         |                 |             |
| 2ma     | 9.35            | 9.37 (1)    |         |                 |             |

All values are reported in CDCl<sub>3</sub>

#### ***N*-(4-methoxybenzyl)-4-methylbenzenesulfonamide (3aa)<sup>5</sup>**

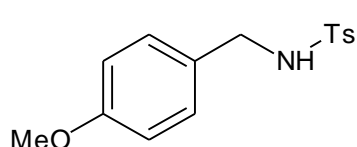

White solid (90 mg, 61% yield). M.p. 119-121 °C. Purification (hexanes:EtOAc, 60:40).  $R_f = 0.56$ . <sup>1</sup>H NMR (400 MHz, CDCl<sub>3</sub>)  $\delta = 7.75$  (d,  $J = 8.0$  Hz, 2H), 7.30 (d,  $J = 8.0$  Hz, 2H), 7.10 (d,  $J = 8.0$  Hz), 6.79 (d,  $J = 8.0$  Hz, 2H), 4.72 (t,  $J = 4.0$  Hz, 1H), 4.04 (d,  $J = 4.0$  Hz, 2H), 3.77 (s, 3H), 2.43 (s, 3H) ppm. <sup>13</sup>C NMR (100 MHz, CDCl<sub>3</sub>)  $\delta$  159.3, 143.4, 136.8, 129.7, 129.2, 128.2, 127.2, 114.0, 55.3, 46.8, 21.5 ppm. IR (neat):  $\nu = 3248, 2922, 1612, 1513, 1320, 1251, 1155, 1029, 815, 553$  cm<sup>-1</sup>. HRMS (ESI): calculated for C<sub>15</sub>H<sub>18</sub>N<sub>1</sub>O<sub>3</sub>S<sub>1</sub> [M + H]<sup>+</sup> requires  $m/z$  292.10074, found  $m/z$  292.07983.

#### **4-methyl-*N*-(4-methylbenzyl)benzenesulfonamide (smaller scale, 0.125 mmol) (3ba)<sup>5</sup>**

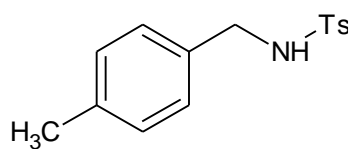

White solid (21 mg, 60%). M.p. 88-90 °C. Purification (hexanes:EtOAc, 70:30).  $R_f = 0.50$ . <sup>1</sup>H NMR (400 MHz, CDCl<sub>3</sub>)  $\delta = 7.76$  (d,  $J = 8.0$  Hz, 2H), 7.31 (d,  $J = 8.0$  Hz, 2H), 7.08 (s, 4H), 4.62 (t,  $J = 6.0$  Hz, 1H), 4.07 (d,  $J = 6.0$  Hz, 2H), 2.44 (s, 3H), 2.31 (s, 3H) ppm. <sup>13</sup>C NMR (100 MHz, CDCl<sub>3</sub>)  $\delta$  143.5, 137.7, 136.8, 133.1, 129.7, 129.3, 127.8, 127.2, 47.0, 21.5, 21.1 ppm. IR (neat):  $\nu = 3261, 2921, 1597, 1323, 1151, 1093, 748, 665$  cm<sup>-1</sup>. HRMS (ESI): calculated for C<sub>15</sub>H<sub>18</sub>N<sub>1</sub>O<sub>2</sub>S<sub>1</sub> [M + H]<sup>+</sup> requires  $m/z$  276.10583, found  $m/z$  276.10449.

### ***N*-benzyl-4-methylbenzenesulfonamide (3ca)<sup>5</sup>**

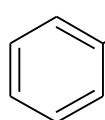

White solid (66 mg, 50%). M.p. 114-116 °C. Purification (hexanes:EtOAc, 60:40).  $R_f$  = 0.71. <sup>1</sup>H NMR (400 MHz, CDCl<sub>3</sub>)  $\delta$  = 7.74 (d,  $J$  = 8.0 Hz, 2H), 7.29 (d,  $J$  = 8.0 Hz, 2H), 7.30-7.24 (m, 3H), 7.20-7.18 (m, 2H), 4.84 (t,  $J$  = 4.0 Hz, 1H), 4.11 (d,  $J$  = 4.0 Hz, 2H), 2.43 (s, 3H) ppm. <sup>13</sup>C NMR (100 MHz, CDCl<sub>3</sub>)  $\delta$  143.5, 136.8, 136.2, 129.7, 128.7, 127.9, 127.8, 127.2, 47.2, 21.5 ppm. IR (neat):  $\nu$  = 3268, 3064, 1598, 1453, 1321, 1160, 1058, 874, 805, 741 cm<sup>-1</sup>. HRMS (ESI): calculated for C<sub>14</sub>H<sub>16</sub>N<sub>1</sub>O<sub>2</sub>S<sub>1</sub> [M + H]<sup>+</sup> requires  $m/z$  262.09018, found  $m/z$  262.08948.

### ***N*-(4-bromobenzyl)-4-methylbenzenesulfonamide (3da)<sup>6</sup>**

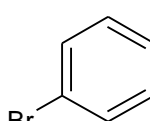

White solid (78 mg, 45%). M.p. 113-115 °C. Purification (hexanes:EtOAc, 60:40).  $R_f$  = 0.69. <sup>1</sup>H NMR (400 MHz, CDCl<sub>3</sub>)  $\delta$  = 7.71 (d,  $J$  = 8.0 Hz, 2H), 7.36 (d,  $J$  = 8.0 Hz, 2H), 7.28 (d,  $J$  = 8.0 Hz, 2H), 7.07 (d,  $J$  = 8.0 Hz, 2H), 5.17 (t,  $J$  = 4.0 Hz, 1H), 4.06 (d,  $J$  = 4.0 Hz, 2H), 2.43 (s, 3H) ppm. <sup>13</sup>C NMR (100 MHz, CDCl<sub>3</sub>)  $\delta$  143.7, 136.7, 135.4, 131.7, 129.7, 129.5, 127.1, 121.7, 46.5, 21.5 ppm. IR (neat):  $\nu$  = 3269, 2920, 1597, 1317, 1155, 1072, 1013, 878, 802, 544 cm<sup>-1</sup>. HRMS (ESI): calculated for C<sub>14</sub>H<sub>15</sub>N<sub>1</sub>O<sub>2</sub>S<sub>1</sub>Br<sub>1</sub> [M + H]<sup>+</sup> requires  $m/z$  342.00069, found  $m/z$  341.99771.

### ***N*-(4-chlorobenzyl)-4-methylbenzenesulfonamide (smaller scale, 0.125 mmol) (3ea)<sup>5</sup>**

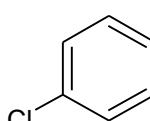

White solid (27 mg, 74%). M.p. 105-107 °C. Purification (hexanes:EtOAc, 60:40).  $R_f$  = 0.68. <sup>1</sup>H NMR (400 MHz, CDCl<sub>3</sub>)  $\delta$  = 7.72 (d,  $J$  = 8.0 Hz, 2H), 7.29 (d,  $J$  = 8.0 Hz, 2H), 7.22 (d,  $J$  = 8.0 Hz, 2H), 7.13 (d,  $J$  = 8.0 Hz, 2H), 4.81 (t,  $J$  = 4.0 Hz, 1H), 4.08 (d,  $J$  = 4.0 Hz, 2H), 2.43 (s, 3H) ppm. <sup>13</sup>C NMR (100 MHz, CDCl<sub>3</sub>)  $\delta$  143.7, 136.7, 134.8, 133.7, 129.8, 129.2, 128.8, 127.1, 46.5, 21.5 ppm. IR (neat):  $\nu$  = 3226, 2920, 1597, 1304, 1183, 816 cm<sup>-1</sup>. HRMS (ESI): calculated for C<sub>14</sub>H<sub>15</sub>N<sub>1</sub>O<sub>2</sub>S<sub>1</sub>Cl<sub>1</sub> [M + H]<sup>+</sup> requires  $m/z$  296.05120, found  $m/z$  296.05054.

### **4-methyl-*N*-(4-nitrobenzyl)benzenesulfonamide (3fa)**

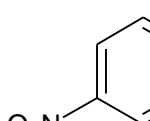

Yellow solid (62 mg, 40%). M.p. 111-113 °C. Purification (hexanes:EtOAc, 60:40).  $R_f$  = 0.47. <sup>1</sup>H NMR (400 MHz, CDCl<sub>3</sub>)  $\delta$  = 8.12 (d,  $J$  = 8.0 Hz, 2H), 7.74 (d,  $J$  = 8.0 Hz, 2H), 7.40 (d,  $J$  = 8.0 Hz, 2H), 7.30 (d,  $J$  = 8.0 Hz, 2H), 5.13 (t,  $J$  = 4.0 Hz, 1H), 4.24 (d,  $J$  = 4.0 Hz, 2H), 2.44 (s, 3H) ppm. <sup>13</sup>C NMR (100 MHz, CDCl<sub>3</sub>)  $\delta$  144.0, 143.9, 136.6, 129.9, 128.4, 127.1, 123.8, 46.4, 27.5, 21.6 ppm. IR (neat):  $\nu$  = 3252, 2855, 1516, 1309, 1150, 1109, 814 cm<sup>-1</sup>. HRMS (ESI): calculated for C<sub>14</sub>H<sub>15</sub>N<sub>2</sub>O<sub>4</sub>S<sub>1</sub> [M + H]<sup>+</sup> requires  $m/z$  307.07525, found  $m/z$  307.07452.

### ***N*-(4-cyanobenzyl)-4-methylbenzenesulfonamide (3ga)**

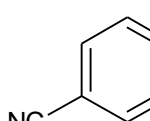

White solid (63 mg, 44%). M.p. 120-126 °C. Purification (hexanes:EtOAc, 60:40).  $R_f$  = 0.38. <sup>1</sup>H NMR (400 MHz, CDCl<sub>3</sub>)  $\delta$  = 7.72 (d,  $J$  = 8.0 Hz, 2H), 7.53 (d,  $J$  = 8.0 Hz, 2H), 7.35 (d,  $J$  = 8.0 Hz, 2H), 7.29 (d,  $J$  = 8.0 Hz, 2H), 5.43 (t,  $J$  = 4.0 Hz, 1H), 4.17 (d,  $J$  = 4.0 Hz, 2H), 2.44 (s, 3H) ppm. <sup>13</sup>C NMR (100 MHz, CDCl<sub>3</sub>)  $\delta$  143.9, 142.0, 136.6, 132.3, 129.8, 128.3, 127.0, 118.5, 111.5, 46.6, 21.5 ppm. IR (neat):  $\nu$  = 3234, 2922, 2857, 2230, 1594, 1324, 1152, 1069, 842, 815, 548 cm<sup>-1</sup>. HRMS (ESI): calculated for C<sub>15</sub>H<sub>15</sub>N<sub>2</sub>O<sub>2</sub>S<sub>1</sub> [M + H]<sup>+</sup> requires  $m/z$  287.08543, found  $m/z$  287.08475.

#### 4-methyl-*N*-(3-methylbenzyl)benzenesulfonamide (3ha)<sup>8</sup>

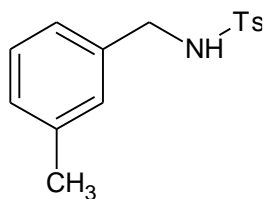

White solid (46 mg, 33%). M.p. 64-66 °C. Purification (hexanes:EtOAc, 60:40).  $R_f = 0.81$ .  $^1\text{H NMR}$  (400 MHz,  $\text{CDCl}_3$ )  $\delta = 7.76$  (d,  $J = 8.0$  Hz, 2H), 7.31 (d,  $J = 8.0$  Hz, 2H), 7.16 (t,  $J = 8.0$  Hz, 1H), 7.06 (d,  $J = 8.0$  Hz, 1H), 6.98 (m, 2H), 4.60 (t,  $J = 4.0$  Hz, 1H), 4.09 (d,  $J = 4.0$  Hz, 2H), 2.44 (s, 3H), 2.28 (s, 3H).  $^{13}\text{C NMR}$  (100 MHz,  $\text{CDCl}_3$ )  $\delta$  143.5, 138.4, 136.8, 136.1, 129.7, 128.62, 128.59, 128.56, 127.2, 124.9, 47.3, 21.5, 21.2 ppm. IR (neat):  $\nu = 3294, 3029, 2922, 1596, 1320, 1153, 1065, 908, 811, 664, 537$   $\text{cm}^{-1}$ . HRMS (ESI): calculated for  $\text{C}_{15}\text{H}_{18}\text{N}_1\text{O}_2\text{S}_1$   $[\text{M} + \text{H}]^+$  requires  $m/z$  276.10583, found  $m/z$  276.10513.

#### 4-methyl-*N*-(2-methylbenzyl)benzenesulfonamide (smaller scale, 0.125 mmol) (3ia)<sup>7</sup>

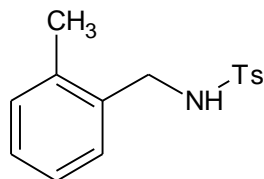

White solid (23 mg, 33%). M.p. 113-117 °C. Purification (hexanes: EtOAc, 60:40).  $R_f = 0.74$ .  $^1\text{H NMR}$  (400 MHz,  $\text{CDCl}_3$ )  $\delta = 7.77$  (d,  $J = 8.0$  Hz, 2H), 7.32 (d,  $J = 8.0$  Hz, 2H), 7.21-7.10 (m, 4H), 4.46 (t,  $J = 4.0$  Hz, 1H), 4.09 (d,  $J = 4.0$  Hz, 2H), 2.44 (s, 3H), 2.24 (s, 3H) ppm.  $^{13}\text{C NMR}$  (100 MHz,  $\text{CDCl}_3$ )  $\delta$  143.5, 136.7, 136.6, 133.8, 130.6, 129.7, 128.8, 128.2, 127.2, 126.2, 45.4, 21.5, 18.8 ppm. IR (neat):  $\nu = 3260, 3023, 2925, 1597, 1489, 1423, 1318, 1152, 1091, 1041, 879, 806, 702, 654$   $\text{cm}^{-1}$ . HRMS (ESI): calculated for  $\text{C}_{15}\text{H}_{18}\text{N}_1\text{O}_2\text{S}_1$   $[\text{M} + \text{H}]^+$  requires  $m/z$  276.10583, found  $m/z$  276.10483.

#### *N*-(3-methoxybenzyl)-4-methylbenzenesulfonamide (smaller scale, 0.125 mmol) (3ja)<sup>8</sup>

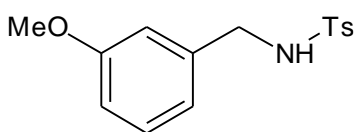

Clear oil (15 mg, 40%). Purification (hexanes:EtOAc, 60:40).  $R_f = 0.15$ .  $^1\text{H NMR}$  (400 MHz,  $\text{CDCl}_3$ )  $\delta = 7.76$  (d,  $J = 8.0$  Hz, 2H), 7.31 (d,  $J = 8.0$  Hz, 2H), 7.19 (t,  $J = 8.0$  Hz, 1H), 6.80-6.75 (m, 2H), 6.73 (s, 1H), 4.65 (m, 1H), 4.10 (d,  $J = 6.0$  Hz, 2H), 3.75 (s, 3H), 2.44 (s, 3H) ppm.  $^{13}\text{C NMR}$  (100 MHz,  $\text{CDCl}_3$ )  $\delta$  159.8, 143.6, 137.8, 136.8, 129.8, 129.7, 127.2, 120.0, 113.7, 113.1, 55.2, 47.3, 21.5 ppm. IR (neat):  $\nu = 3279, 2922, 1597, 1586, 1490, 1455, 1436, 1320, 1288, 1262, 1152, 1091, 1040, 864, 812, 780, 660$   $\text{cm}^{-1}$ . HRMS (ESI): calculated for  $\text{C}_{15}\text{H}_{18}\text{N}_1\text{O}_3\text{S}_1$   $[\text{M} + \text{H}]^+$  requires  $m/z$  292.10074, found  $m/z$  292.09961.

#### *N*-[(2-Methoxyphenyl)methyl]-4-methylbenzenesulfonamide (3ka)<sup>8</sup>

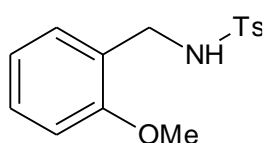

White solid (57 mg, 40%). M.p. 79-81 °C. Purification (hexanes:EtOAc, 70:30).  $R_f = 0.33$ .  $^1\text{H NMR}$  (400 MHz,  $\text{CDCl}_3$ )  $\delta = 7.66$  (d,  $J = 8.0$  Hz, 2H), 7.21-7.16 (m, 3H), 7.06 (d,  $J = 8.0$  Hz, 1H), 6.80 (t,  $J = 8.0$  Hz, 1H), 6.73 (d,  $J = 8.0$  Hz, 1H), 5.09 (t,  $J = 4.0$  Hz, 1H), 4.14 (d,  $J = 4.0$  Hz, 2H), 3.73 (s, 3H), 2.38 (s, 3H) ppm.  $^{13}\text{C NMR}$  (100 MHz,  $\text{CDCl}_3$ )  $\delta$  157.2, 143.0, 129.8, 129.4, 129.2, 127.03, 126.99, 124.3, 120.5, 110.1, 55.1, 44.0, 21.5 ppm. IR (neat):  $\nu = 3304, 3254, 3014, 2949, 2837, 1602, 1404, 1325, 1148, 1024, 756, 663$   $\text{cm}^{-1}$ . HRMS (ESI): calculated for  $\text{C}_{15}\text{H}_{18}\text{N}_1\text{O}_3\text{S}_1$   $[\text{M} + \text{H}]^+$  requires  $m/z$  292.10074, found  $m/z$  292.09958.

#### *N*-(3-bromobenzyl)-4-methylbenzenesulfonamide (3la)<sup>6</sup>

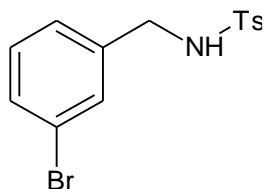

White solid (36 mg, 22%). M.p. 78-80 °C. Purification (hexanes:EtOAc, 60:40).  $R_f = 0.57$ .  $^1\text{H NMR}$  (400 MHz,  $\text{CDCl}_3$ )  $\delta = 7.73$  (d,  $J = 8.0$  Hz, 2H), 7.37 (td,  $J = 4.0$  Hz, 1H), 7.31 (d,  $J = 8.0$  Hz, 2H), 7.27 (m, 1H), 7.15 (d,  $J = 4.0$  Hz, 2H), 4.72 (t,  $J = 4.0$  Hz, 1H), 4.11 (d,  $J = 4.0$  Hz, 2H), 2.44 (s, 3H) ppm.  $^{13}\text{C NMR}$  (100 MHz,  $\text{CDCl}_3$ )  $\delta$  143.8, 138.5, 136.7, 131.0, 130.8, 130.2, 129.8, 127.1, 126.4, 122.7, 46.6, 21.5 ppm. IR (neat):  $\nu = 3259, 3067, 2918, 2852, 1570, 1435, 1316, 1149, 1052, 921, 814, 692, 529$   $\text{cm}^{-1}$ . HRMS (ESI): calculated for  $\text{C}_{14}\text{H}_{15}\text{N}_1\text{O}_2\text{S}_1\text{Br}_1$   $[\text{M} + \text{H}]^+$  requires  $m/z$  342.00069, found  $m/z$  341.99731.

### *N*-(2-bromobenzyl)-4-methylbenzenesulfonamide (3ma)<sup>6</sup>

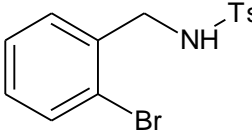 Yellow oil (50 mg, 30%). Purification (hexanes:EtOAc, 80:20).  $R_f = 0.27$ .  $^1\text{H NMR}$  (400 MHz,  $\text{CDCl}_3$ )  $\delta = 7.71$  (d,  $J = 8.0$  Hz, 2H), 7.45 (d,  $J = 8.0$  Hz, 1H), 7.30 (d,  $J = 8.0$  Hz, 1H), 7.25 (d,  $J = 8.0$  Hz, 2H), 7.21 (t,  $J = 8.0$  Hz, 1H), 7.10 (t,  $J = 8.0$  Hz, 1H), 5.03 (t,  $J = 6.0$  Hz, 1H), 4.22 (d,  $J = 6.0$  Hz, 2H), 2.41 (s, 3H) ppm.  $^{13}\text{C NMR}$  (100 MHz,  $\text{CDCl}_3$ )  $\delta = 136.9, 135.5, 132.7, 130.5, 129.6, 129.5, 129.1, 127.7, 127.1, 123.4, 47.4, 21.5$  ppm. IR (neat):  $\nu = 3282, 2922, 1597, 1441, 1325, 1154, 1024, 811, 658$   $\text{cm}^{-1}$ . HRMS (ESI): calculated for  $\text{C}_{14}\text{H}_{15}\text{N}_1\text{O}_2\text{S}_1\text{Br}_1$   $[\text{M} + \text{H}]^+$  requires  $m/z$  342.00069, found  $m/z$  341.99728.

### *N*-(4-methylbenzyl)benzenesulfonamide (3bb)<sup>11</sup>

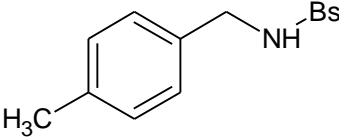 White solid (52 mg, 40%). M.p. 76-79 °C. Purification (hexanes:EtOAc, 70:30).  $R_f = 0.48$ .  $^1\text{H NMR}$  (400 MHz,  $\text{CDCl}_3$ )  $\delta = 7.87$  (d,  $J = 8.0$  Hz, 2H), 7.59 (tt,  $J = 8.0$  Hz, 4.0 Hz, 1H), 7.51 (m, 2H), 7.06 (s, 4H), 4.75 (t,  $J = 4.0$  Hz, 1H), 4.09 (d,  $J = 4.0$  Hz, 2H), 2.30 (s, 3H) ppm.  $^{13}\text{C NMR}$  (100 MHz,  $\text{CDCl}_3$ )  $\delta = 139.9, 137.7, 133.1, 132.7, 129.3, 129.1, 127.8, 127.1, 47.1, 21.1$  ppm. IR (neat):  $\nu = 3264, 2920, 1615, 1445, 1318, 1156, 1038, 907, 805$   $\text{cm}^{-1}$ . HRMS (ESI): calculated for  $\text{C}_{14}\text{H}_{16}\text{N}_1\text{O}_2\text{S}_1$   $[\text{M} + \text{H}]^+$  requires  $m/z$  262.09018, found  $m/z$  262.08905.

### *N*-(4-chlorobenzyl)benzenesulfonamide (smaller scale, 0.125 mmol) (3eb)<sup>9</sup>

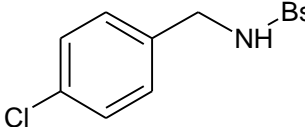 White solid (51 mg, 70%). M.p. 109-112 °C. Purification (hexanes:EtOAc, 70:30).  $R_f = 0.44$ .  $^1\text{H NMR}$  (400 MHz,  $\text{CDCl}_3$ )  $\delta = 7.84$  (d,  $J = 8.0$  Hz, 2H), 7.61-7.57 (m, 1H), 7.51 (d,  $J = 8.0$  Hz, 2H), 7.22 (d,  $J = 8.0$  Hz, 2H), 7.12 (d,  $J = 8.0$  Hz, 2H), 4.87 (t,  $J = 4.0$  Hz, 1H), 4.11 (d,  $J = 4.0$  Hz, 2H) ppm.  $^{13}\text{C NMR}$  (100 MHz,  $\text{CDCl}_3$ )  $\delta = 139.8, 134.7, 133.8, 132.8, 129.2, 128.8, 127.0, 46.6, 29.7$  ppm. IR (neat):  $\nu = 3255, 3059, 1598, 1490, 1320, 1181, 1091, 817$   $\text{cm}^{-1}$ . HRMS (ESI): calculated for  $\text{C}_{13}\text{H}_{13}\text{N}_1\text{O}_2\text{S}_1\text{Cl}_1$   $[\text{M} + \text{H}]^+$  requires  $m/z$  282.03555, found  $m/z$  282.03458.

### *N*-(2-methylbenzyl)benzenesulfonamide (smaller scale, 0.125 mmol) (3hb)<sup>12</sup>

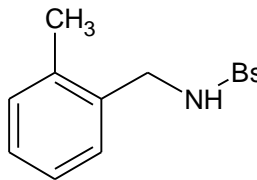 White solid (25 mg, 38%). M.p. 117-123 °C. Purification (hexanes:EtOAc, 60:40).  $R_f = 0.65$ .  $^1\text{H NMR}$  (400 MHz,  $\text{CDCl}_3$ )  $\delta = 7.88$  (d,  $J = 8.0$  Hz, 2H), 7.61-7.57 (m, 1H), 7.53 (d,  $J = 8.0$  Hz, 2H), 7.21-7.09 (m, 4H), 4.56 (t,  $J = 4.0$  Hz, 1H), 4.12 (d,  $J = 4.0$  Hz, 2H), 2.23 (s, 3H) ppm.  $^{13}\text{C NMR}$  (100 MHz,  $\text{CDCl}_3$ )  $\delta = 139.6, 133.7, 132.7, 130.6, 129.3, 129.1, 128.9, 128.3, 127.1, 126.2, 45.4, 18.8$  ppm. IR (neat):  $\nu = 3274, 3068, 1448, 1323, 1159, 1092, 1036, 886, 722, 686$   $\text{cm}^{-1}$ . HRMS (ESI): calculated for  $\text{C}_{14}\text{H}_{16}\text{N}_1\text{O}_2\text{S}_1$   $[\text{M} + \text{H}]^+$  requires  $m/z$  262.09018, found  $m/z$  262.08923.

### 4-chloro-*N*-(4-methylbenzyl)benzenesulfonamide (3bc)

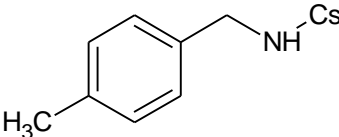 White solid (59 mg, 40%). M.p. 120-122 °C. Purification (hexanes:EtOAc, 70:30).  $R_f = 0.58$ .  $^1\text{H NMR}$  (400 MHz,  $\text{CDCl}_3$ )  $\delta = 7.77$  (d,  $J = 8.0$  Hz, 2H), 7.45 (d,  $J = 8.0$  Hz, 2H), 7.06 (m, 4H), 4.86 (t,  $J = 4.0$  Hz, 1H), 4.10 (d,  $J = 4.0$  Hz, 2H), 2.31 (s, 3H) ppm.  $^{13}\text{C NMR}$  (100 MHz,  $\text{CDCl}_3$ )  $\delta = 139.1, 138.5, 137.9, 132.8, 129.4, 129.3, 128.6, 127.8, 47.1, 21.1$  ppm. IR (neat):  $\nu = 3245, 2923, 1586, 1325, 1158, 1092, 1058, 757, 565$   $\text{cm}^{-1}$ . HRMS (ESI): calculated for  $\text{C}_{14}\text{H}_{15}\text{N}_1\text{O}_2\text{S}_1\text{Cl}_1$   $[\text{M} + \text{H}]^+$  requires  $m/z$  296.05120, found  $m/z$  296.05029.

### ***N*-(4-bromobenzyl)-4-chlorobenzenesulfonamide (smaller scale, 0.125 mmol) (3dc)**

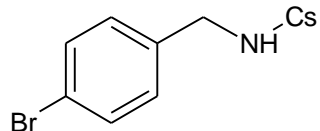

White solid (25 mg, 54%). M.p. 126-128 °C. Purification (hexanes:EtOAc, 70:30).  $R_f = 0.64$ .  $^1\text{H NMR}$  (400 MHz,  $\text{CDCl}_3$ )  $\delta = 7.77$  (d,  $J = 8.0$  Hz, 2H), 7.48 (d,  $J = 8.0$  Hz, 2H), 7.41 (d,  $J = 8.0$  Hz, 2H), 7.08 (d,  $J = 8.0$  Hz, 2H), 4.82 (t,  $J = 4.0$  Hz, 1H), 4.11 (d,  $J = 4.0$  Hz, 2H) ppm.  $^{13}\text{C NMR}$  (100 MHz,  $\text{CDCl}_3$ )  $\delta$  139.4, 138.3, 135.0, 131.8, 129.50, 129.45, 128.5, 122.0, 46.6 ppm. IR (neat):  $\nu = 3246, 3087, 1573, 1320, 1153, 826$   $\text{cm}^{-1}$ . HRMS (ESI): calculated for  $\text{C}_{13}\text{H}_{12}\text{N}_1\text{O}_2\text{S}_1\text{Cl}_1\text{Br}_1$  [ $\text{M} + \text{H}$ ] $^+$  requires  $m/z$  361.94607, found  $m/z$  361.94302.

### **2-chloro-*N*-(4-methylbenzyl)benzenesulfonamide (3bd)**

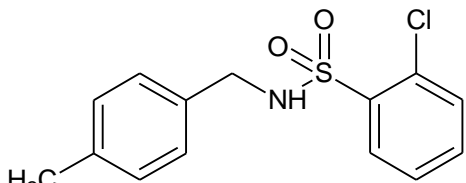

White solid (25 mg, 17%). M.p. 64-66 °C. Purification (hexanes:EtOAc, 70:30).  $R_f = 0.53$ .  $^1\text{H NMR}$  (400 MHz,  $\text{CDCl}_3$ )  $\delta = 8.09$  (d,  $J = 8.0$  Hz, 1H), 7.50-7.49 (m, 2H), 7.42-7.38 (m, 1H), 7.06 (s, 4H), 5.21 (t,  $J = 4.0$  Hz, 1H), 4.07 (d,  $J = 4.0$  Hz, 2H), 2.29 (s, 3H) ppm.  $^{13}\text{C NMR}$  (100 MHz,  $\text{CDCl}_3$ )  $\delta$  137.8, 137.1, 133.6, 132.6, 131.5, 131.4, 131.3, 129.3, 127.9, 127.2, 47.3, 21.1 ppm. IR (neat):  $\nu = 3277, 3094, 2924, 1426, 1327, 1163, 1042, 760, 585$   $\text{cm}^{-1}$ . HRMS (ESI): calculated for  $\text{C}_{14}\text{H}_{15}\text{N}_1\text{O}_2\text{S}_1\text{Cl}_1$  [ $\text{M} + \text{H}$ ] $^+$  requires  $m/z$  296.05120, found  $m/z$  296.05140.

### ***N*-(4-methoxybenzyl)-4-nitrobenzenesulfonamide (3ae)<sup>9</sup>**

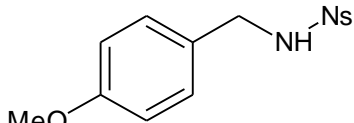

Tan solid (19 mg, 11%). M.p. 126-130 °C. Purification (hexanes:EtOAc, 60:40).  $R_f = 0.53$ .  $^1\text{H NMR}$  (400 MHz,  $\text{CDCl}_3$ )  $\delta = 8.31$  (d,  $J = 8.0$  Hz, 2H), 8.09 (d,  $J = 8.0$  Hz, 2H), 7.08 (d,  $J = 8.0$  Hz, 2H), 6.77 (d,  $J = 8.0$  Hz, 2H), 4.82 (t,  $J = 4.0$  Hz, 1H), 4.16 (d,  $J = 4.0$  Hz, 2H), 3.76 (s, 3H) ppm.  $^{13}\text{C NMR}$  (100 MHz,  $\text{CDCl}_3$ )  $\delta$  146.1, 129.3, 128.6, 128.3, 127.4, 124.3, 121.0, 114.2, 55.3, 47.0 ppm. IR (neat):  $\nu = 3269, 3110, 295, 2840, 1512, 1245, 1151, 1030, 817$   $\text{cm}^{-1}$ . HRMS (ESI): calculated for  $\text{C}_{14}\text{H}_{15}\text{N}_2\text{O}_5\text{S}_1$  [ $\text{M} + \text{H}$ ] $^+$  requires  $m/z$  323.07017, found  $m/z$  323.22165.

### ***N*-(4-chlorobenzyl)-4-nitrobenzenesulfonamide (smaller scale, 0.125 mmol) (3ee)<sup>11</sup>**

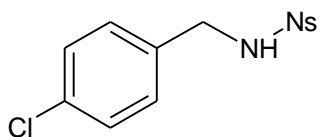

Oil (9 mg, 21%). Purification (hexanes:EtOAc, 60:40).  $R_f = 0.62$ .  $^1\text{H NMR}$  (400 MHz,  $\text{CDCl}_3$ )  $\delta = 8.35$  (d,  $J = 8.0$  Hz, 2H), 8.02 (d,  $J = 8.0$  Hz, 2H), 7.27 (d,  $J = 8.0$  Hz, 2H), 7.15 (d,  $J = 8.0$  Hz, 2H), 4.84 (t,  $J = 4.0$  Hz, 1H), 4.21 (d,  $J = 4.0$  Hz, 2H) ppm.  $^{13}\text{C NMR}$  (100 MHz,  $\text{CDCl}_3$ )  $\delta$  145.9, 134.3, 134.0, 129.2, 129.0, 128.3, 124.4, 46.7, 29.7 ppm. IR (neat):  $\nu = 3265, 2921, 1606, 1341, 1156, 837$   $\text{cm}^{-1}$ . HRMS (ESI): calculated for  $\text{C}_{13}\text{H}_{12}\text{N}_2\text{O}_4\text{S}_1\text{Cl}_1$  [ $\text{M} + \text{H}$ ] $^+$  requires  $m/z$  327.02063, found  $m/z$  327.07776.

### ***N*-(4-methylbenzyl)-3-nitrobenzenesulfonamide (3bf)<sup>10</sup>**

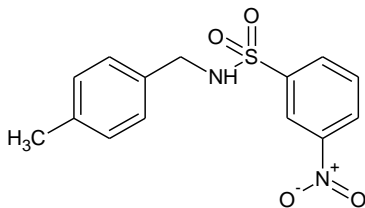

White solid (12 mg, 8%). M.p. 110-113 °C. Purification (hexanes:EtOAc, 70:30).  $R_f = 0.36$ .  $^1\text{H NMR}$  (400 MHz,  $\text{CDCl}_3$ )  $\delta = 8.57$  (t,  $J = 4.0$  Hz, 1H), 8.38 (ddd,  $J = 4.0$  Hz, 8.0 Hz, 1H), 8.13 (dt,  $J = 8.0$  Hz, 1H), 7.67 (t,  $J = 8.0$  Hz, 1H), 7.04 (s, 4H), 4.93 (t,  $J = 4.0$  Hz, 1H), 4.21 (d,  $J = 4.0$  Hz, 2H), 2.28 (s, 3H) ppm.  $^{13}\text{C NMR}$  (100 MHz,  $\text{CDCl}_3$ )  $\delta$  142.6, 138.1, 132.5, 130.3, 129.4, 127.9, 127.1, 126.9, 122.4, 47.2, 21.0 ppm. IR (neat):  $\nu = 3250, 3089, 2921, 1607, 1526, 1428, 1331, 1163$   $\text{cm}^{-1}$ . HRMS (ESI): calculated for  $\text{C}_{14}\text{H}_{15}\text{N}_2\text{O}_4\text{S}_1$  [ $\text{M} + \text{H}$ ] $^+$  requires  $m/z$  307.07525, found  $m/z$  307.07416.

## References:

1. Hopkins, M. D.; Scott, K. A.; DeMier, B. C.; Morgan, H. R.; Macgruder, J. A.; Lamar, A. A., Formation of N-sulfonyl imines from iminoiodinanes by iodine-promoted, N-centered radical sulfonamidation of aldehydes. *Organic & biomolecular chemistry* **2017**, *15* (43), 9209-9216.
2. Castellano, S.; Fiji, H. D. G.; Kinderman, S. S.; Watanabe, M.; de Leon, P.; Tamanoi, F.; Kwon, O., Small-Molecule Inhibitors of Protein Geranylgeranyltransferase Type I. *Journal of the American Chemical Society* **2007**, *129* (18), 5843-5845.
3. Chen, D.; Chen, X.; Du, T.; Kong, L.; Zhen, R.; Zhen, S.; Wen, Y.; Zhu, G., Highly efficient and diastereoselective synthesis of 1,3-oxazolidines featuring a palladium-catalyzed cyclization reaction of 2-butene-1,4-diol derivatives and imines. *Tetrahedron Letters* **2010**, *51* (39), 5131-5133.
4. Kohler, M. C.; Yost, J. M.; Garnsey, M. R.; Coltart, D. M., Direct Carbon–Carbon Bond Formation via Soft Enolization: A Biomimetic Asymmetric Mannich Reaction of Phenylacetate Thioesters. *Organic letters* **2010**, *12* (15), 3376-3379.
5. Gao, F.; Deng, M.; Qian, C., The effect of coordination on the reaction of N-tosyl imines with diethylzinc. *Tetrahedron* **2005**, *61* (52), 12238-12243.
6. Zhu, M.; Fujita, K.-i.; Yamaguchi, R., Simple and Versatile Catalytic System for N-Alkylation of Sulfonamides with Various Alcohols. *Organic letters* **2010**, *12* (6), 1336-1339.
7. Wallach, D. R.; Chisholm, J. D., Alkylation of Sulfonamides with Trichloroacetimidates under Thermal Conditions. *The Journal of organic chemistry* **2016**, *81* (17), 8035-42.
8. Cui, X.; Shi, F.; Tse, M. K.; GÃ¶rdes, D.; Thurow, K.; Beller, M.; Deng, Y., Copper-Catalyzed N-Alkylation of Sulfonamides with Benzylic Alcohols: Catalysis and Mechanistic Studies. *Advanced Synthesis & Catalysis* **2009**, *351* (17), 2949-2958.
9. Yrjölä, S.; Parkkari, T.; Navia-Paldanius, D.; Laitinen, T.; Kaczor, A. A.; Kokkola, T.; Adusei-Mensah, F.; Savinainen, J. R.; Laitinen, J. T.; Poso, A.; Alexander, A.; Penman, J.; Stott, L.; Anskat, M.; Irving, A. J.; Nevalainen, T. J., Potent and selective N-(4-sulfamoylphenyl)thiourea-based GPR55 agonists. *European Journal of Medicinal Chemistry* **2016**, *107*, 119-132.
10. Caddick, S.; Wilden, J. D.; Judd, D. B., Direct Synthesis of Sulfonamides and Activated Sulfonate Esters from Sulfonic Acids. *Journal of the American Chemical Society* **2004**, *126* (4), 1024-1025.
11. Yu, X.; Liu, C.; Jiang, L.; Xu, Q., Manganese Dioxide Catalyzed N-Alkylation of Sulfonamides and Amines with Alcohols under Air. *Organic letters* **2011**, *13* (23), 6184-6187.
12. Li, Z.-l.; Jin, L.-k.; Cai, C., Nickel-catalyzed product-controllable amidation and imidation of sp<sup>3</sup> C-H bonds in substituted toluenes with sulfonamides. *Organic & biomolecular chemistry* **2017**, *15* (6), 1317-1320.

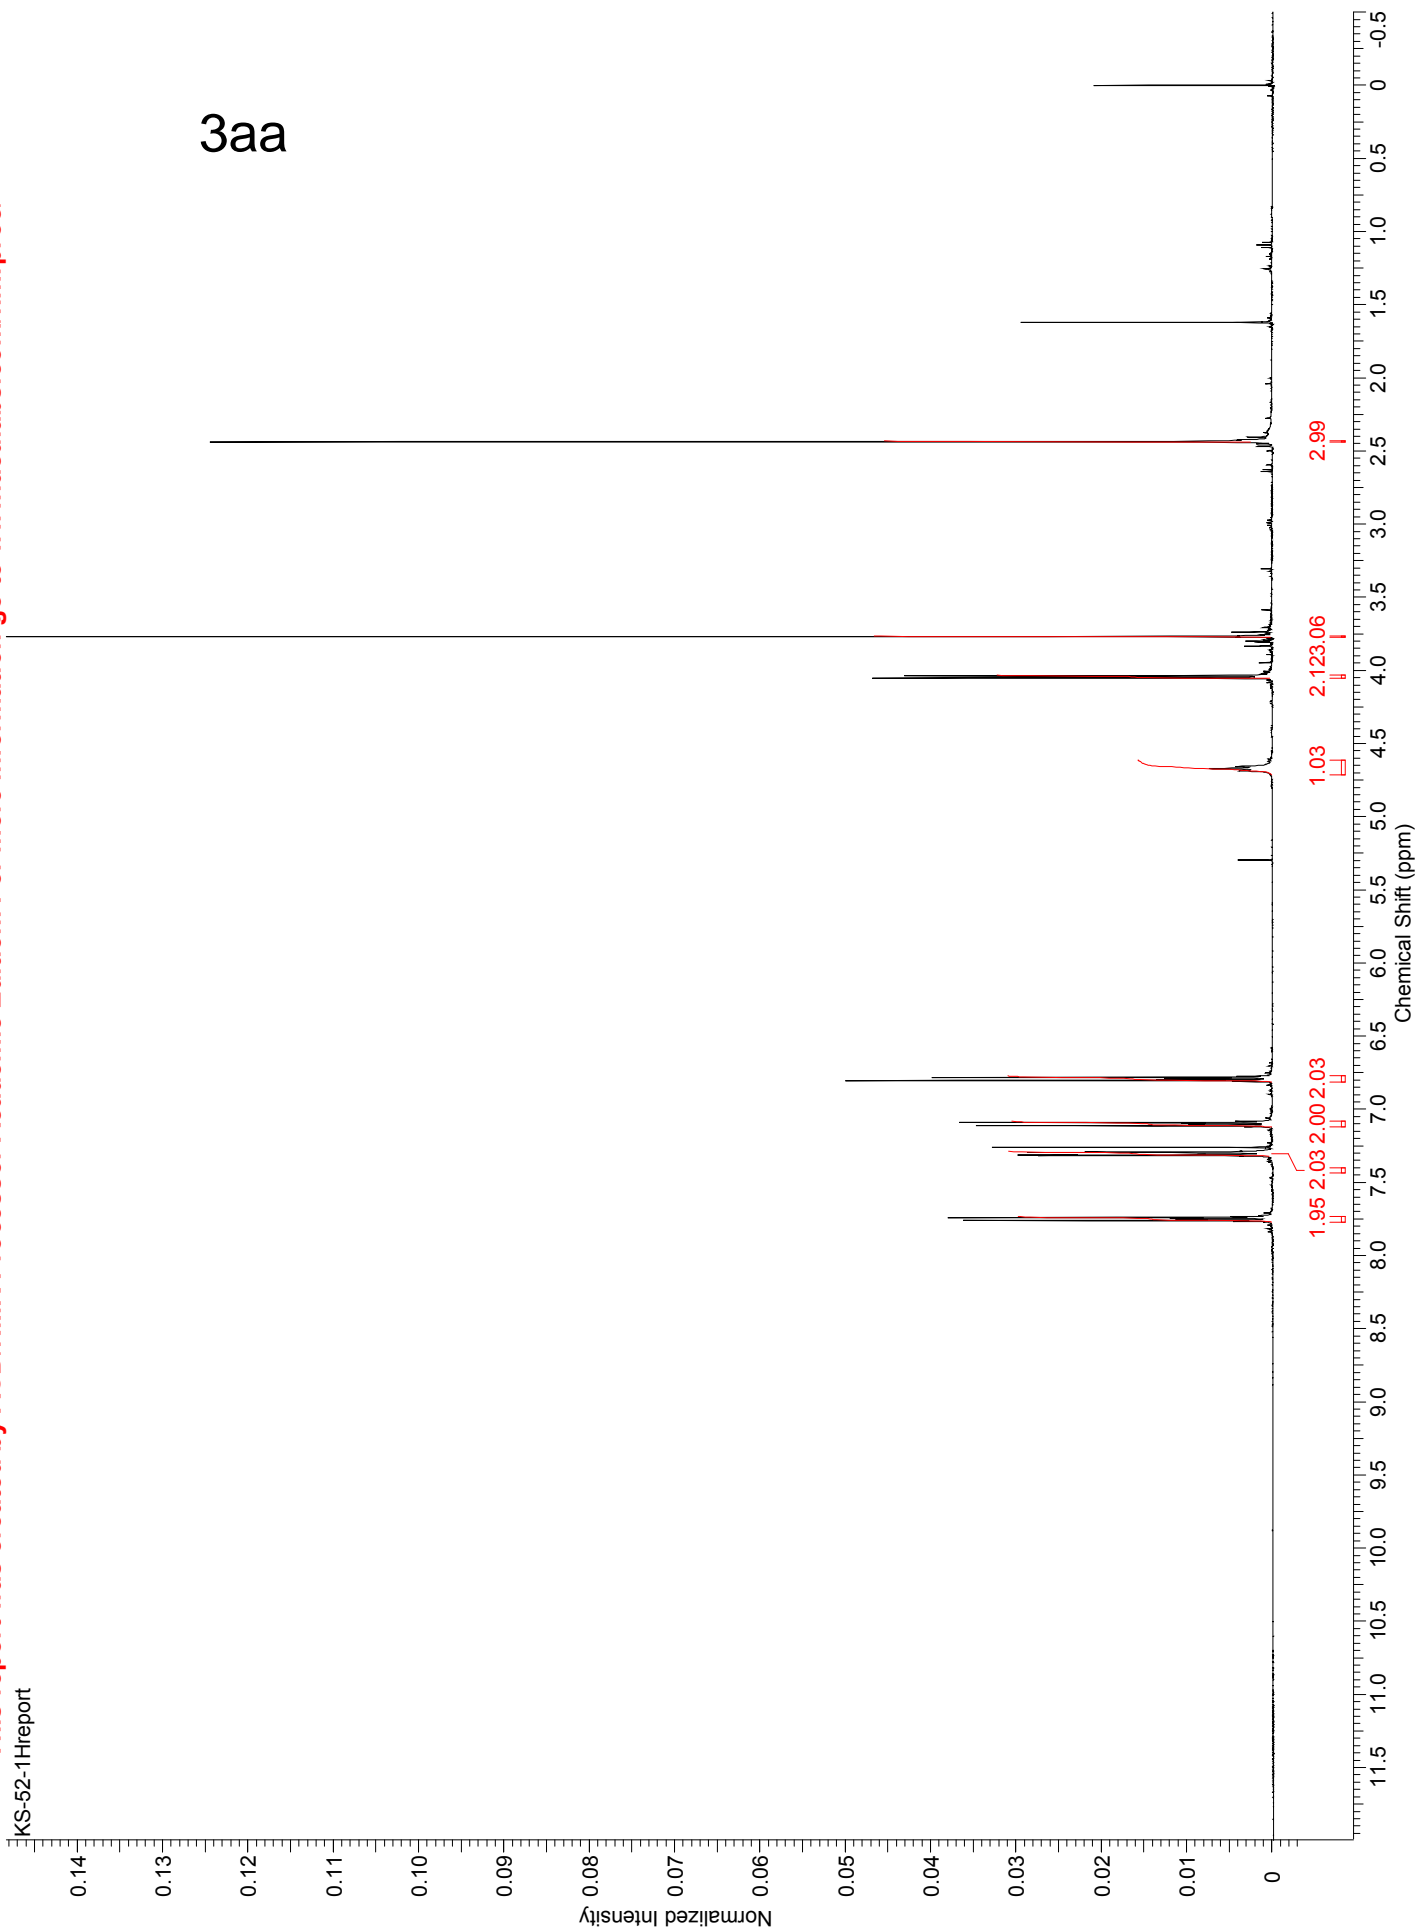



KS-52-13Creport

3aa

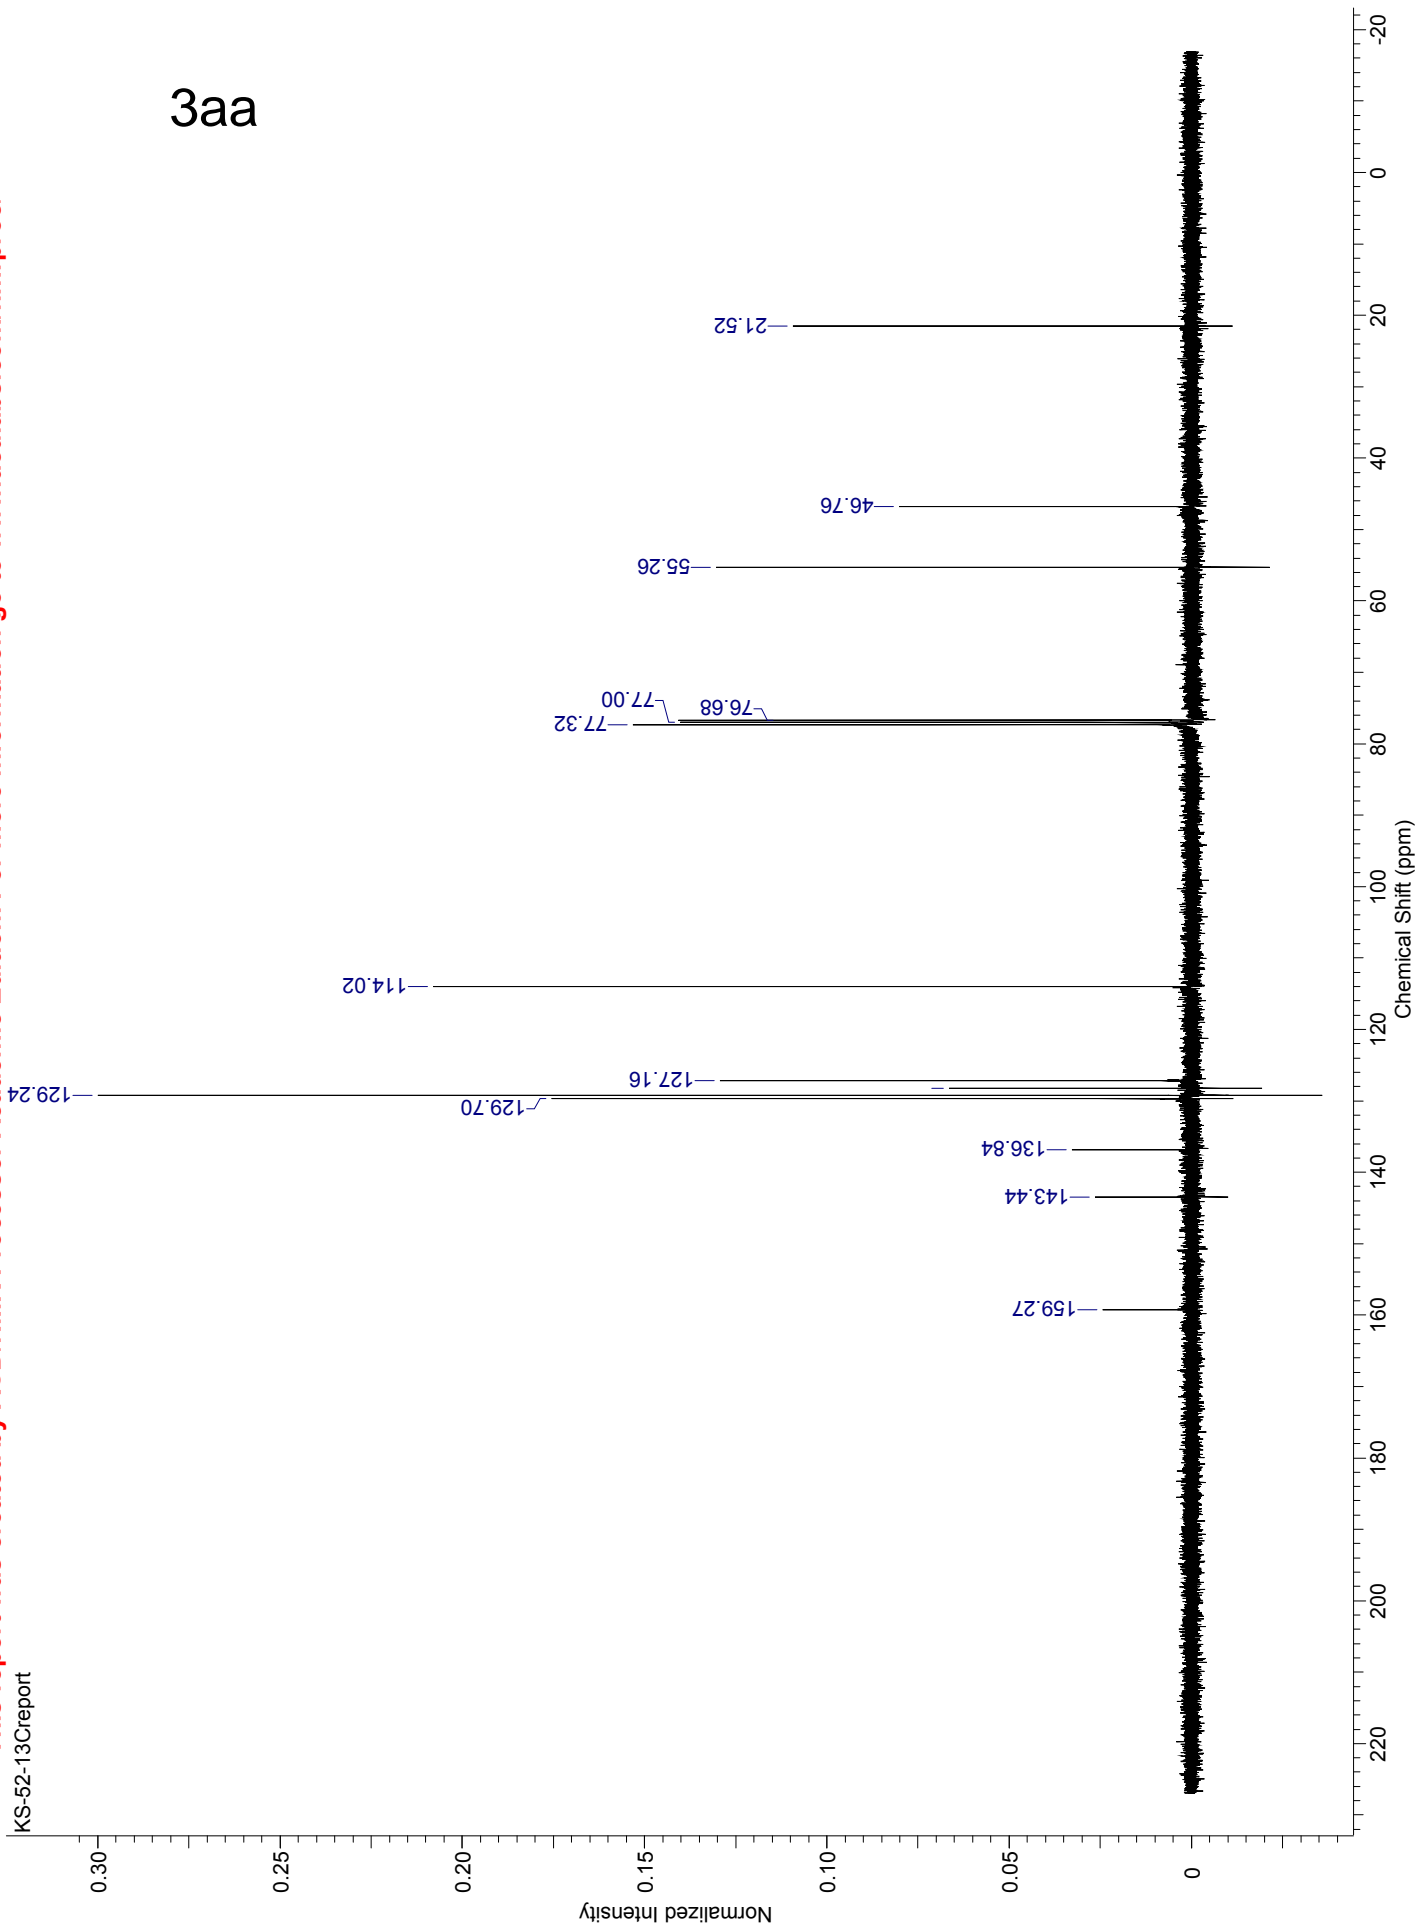

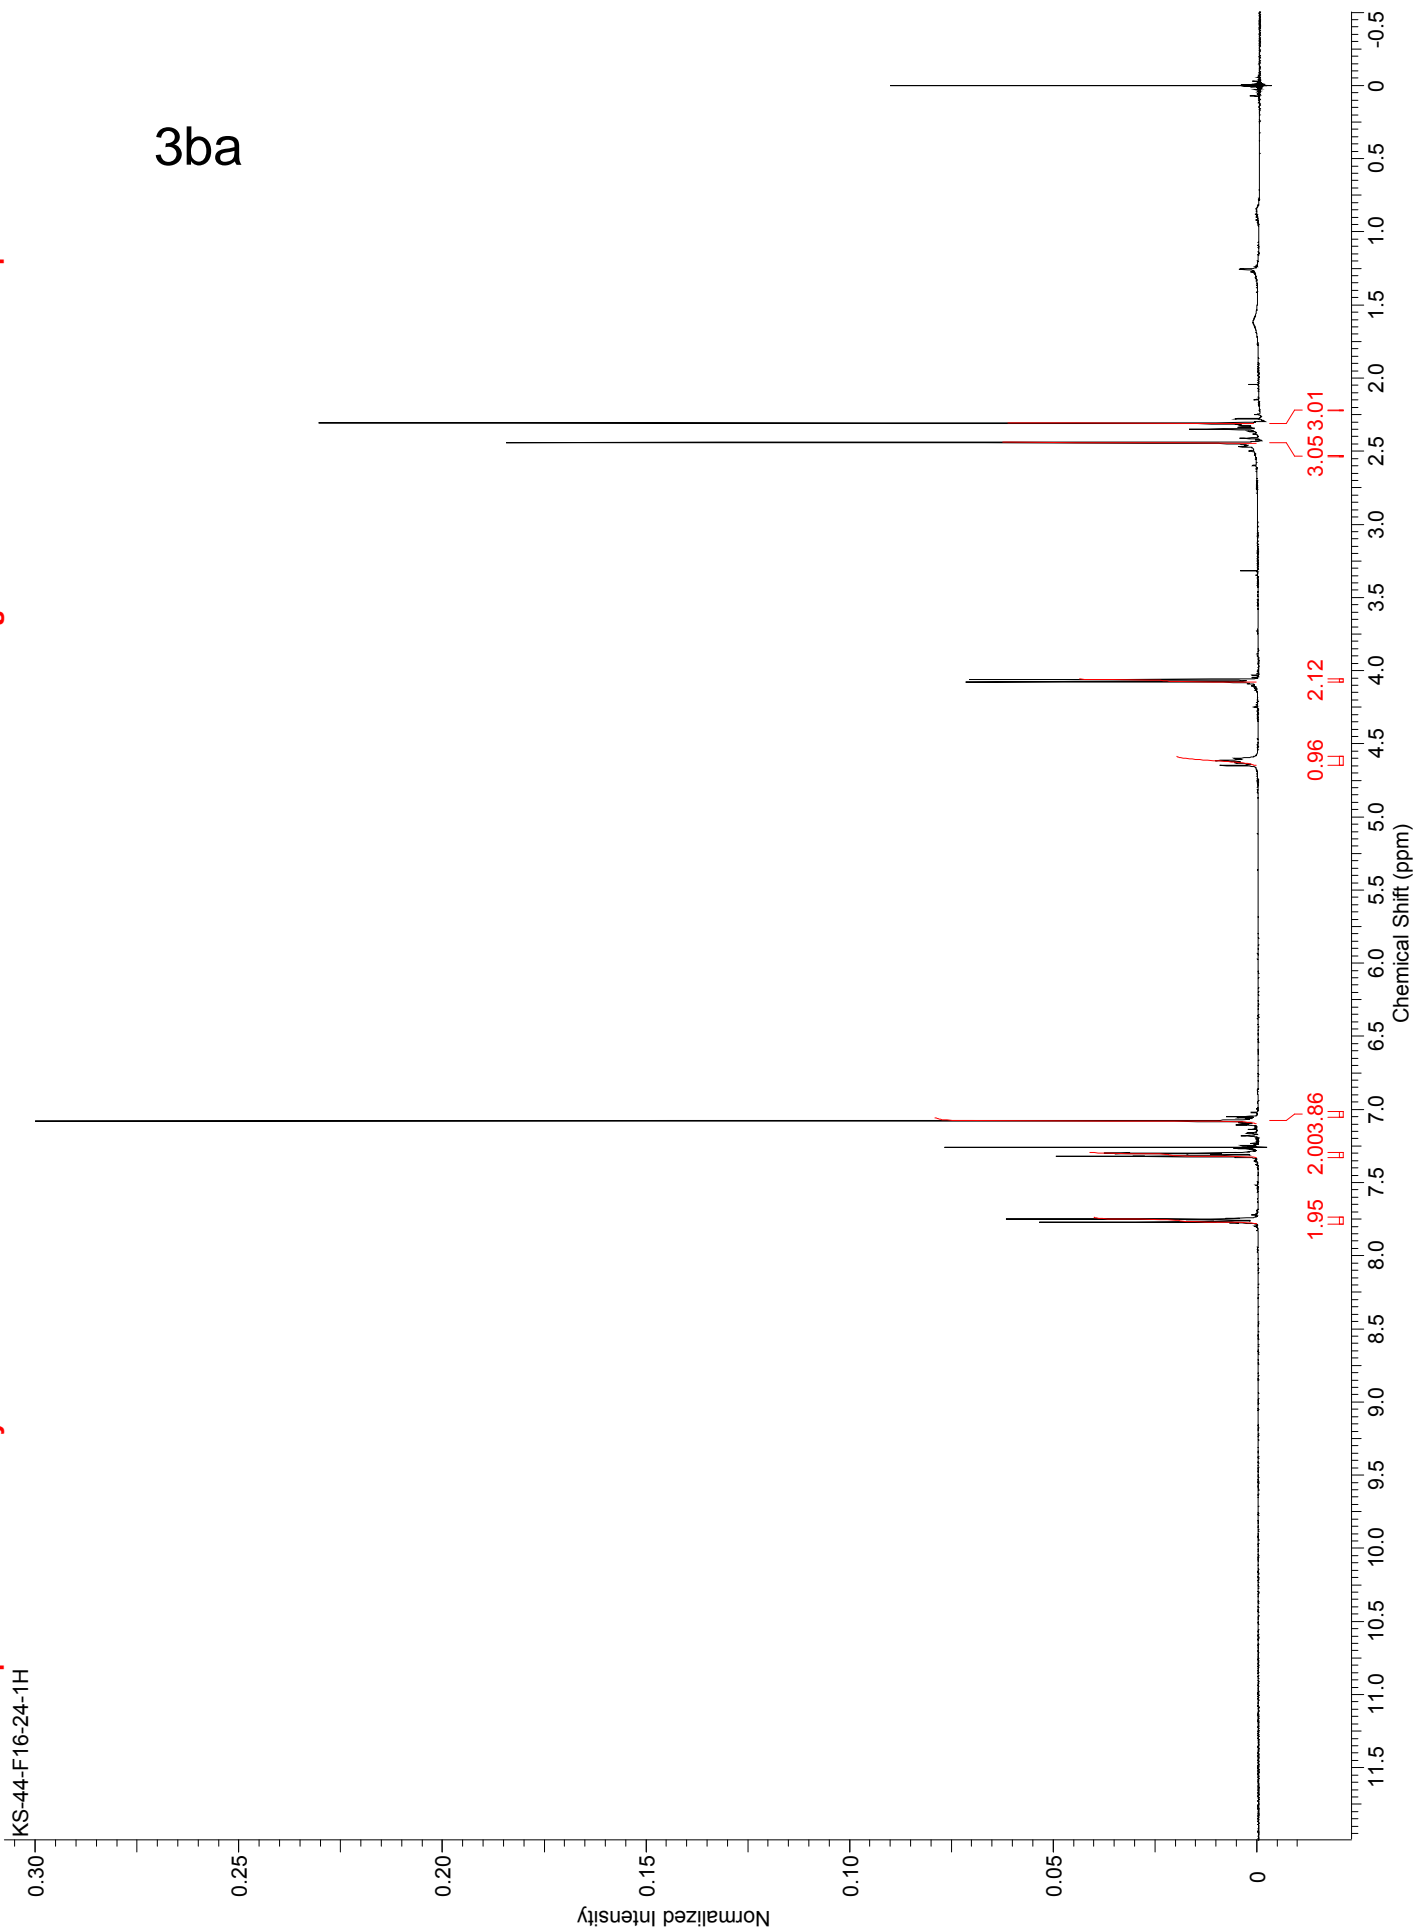

KS-44-F16-24-1H

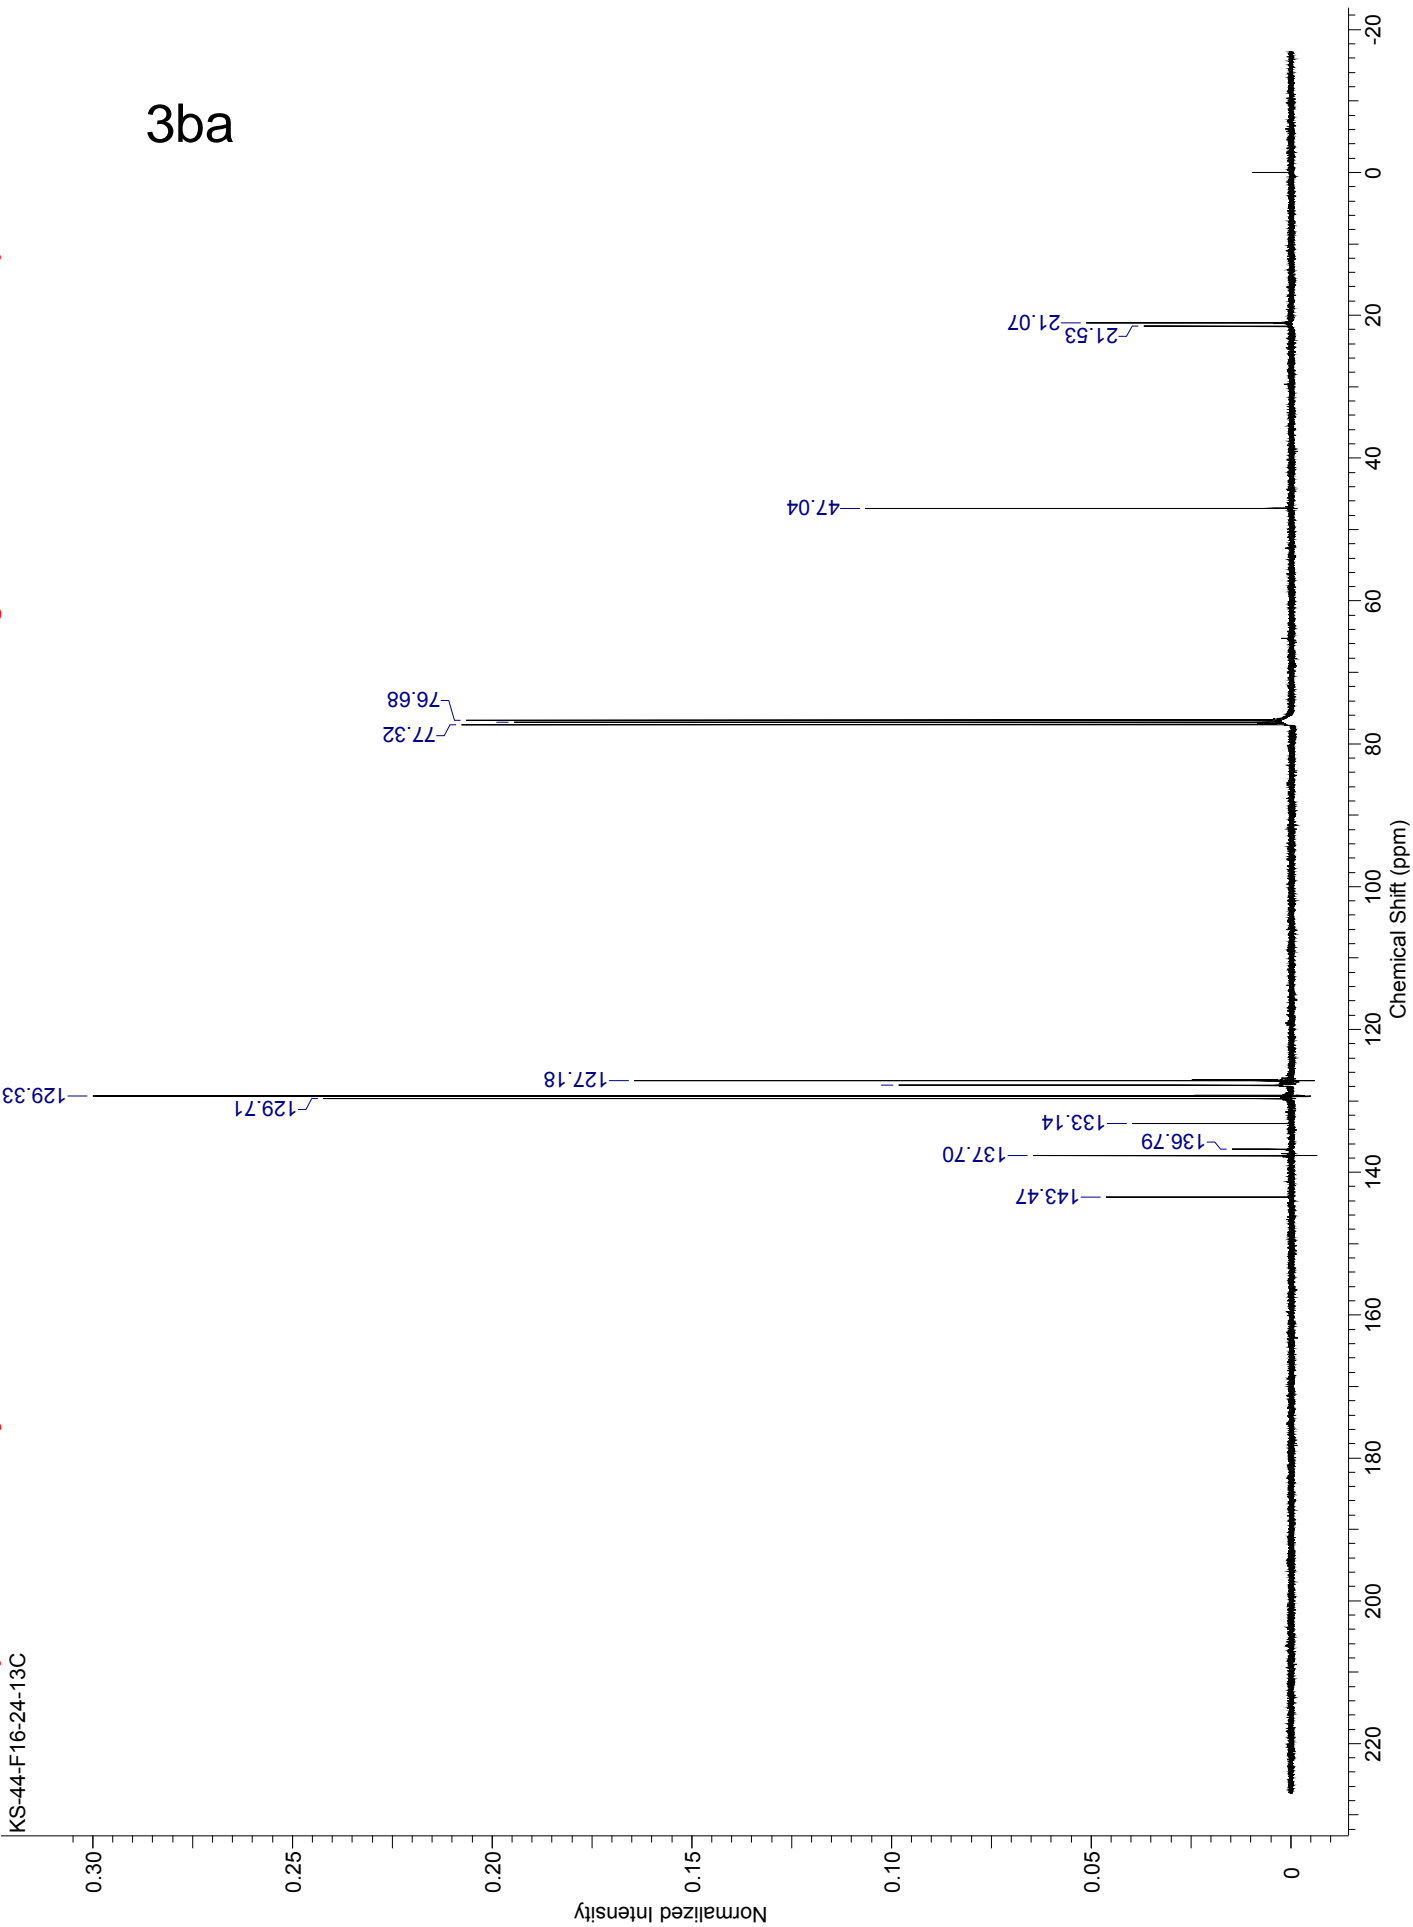

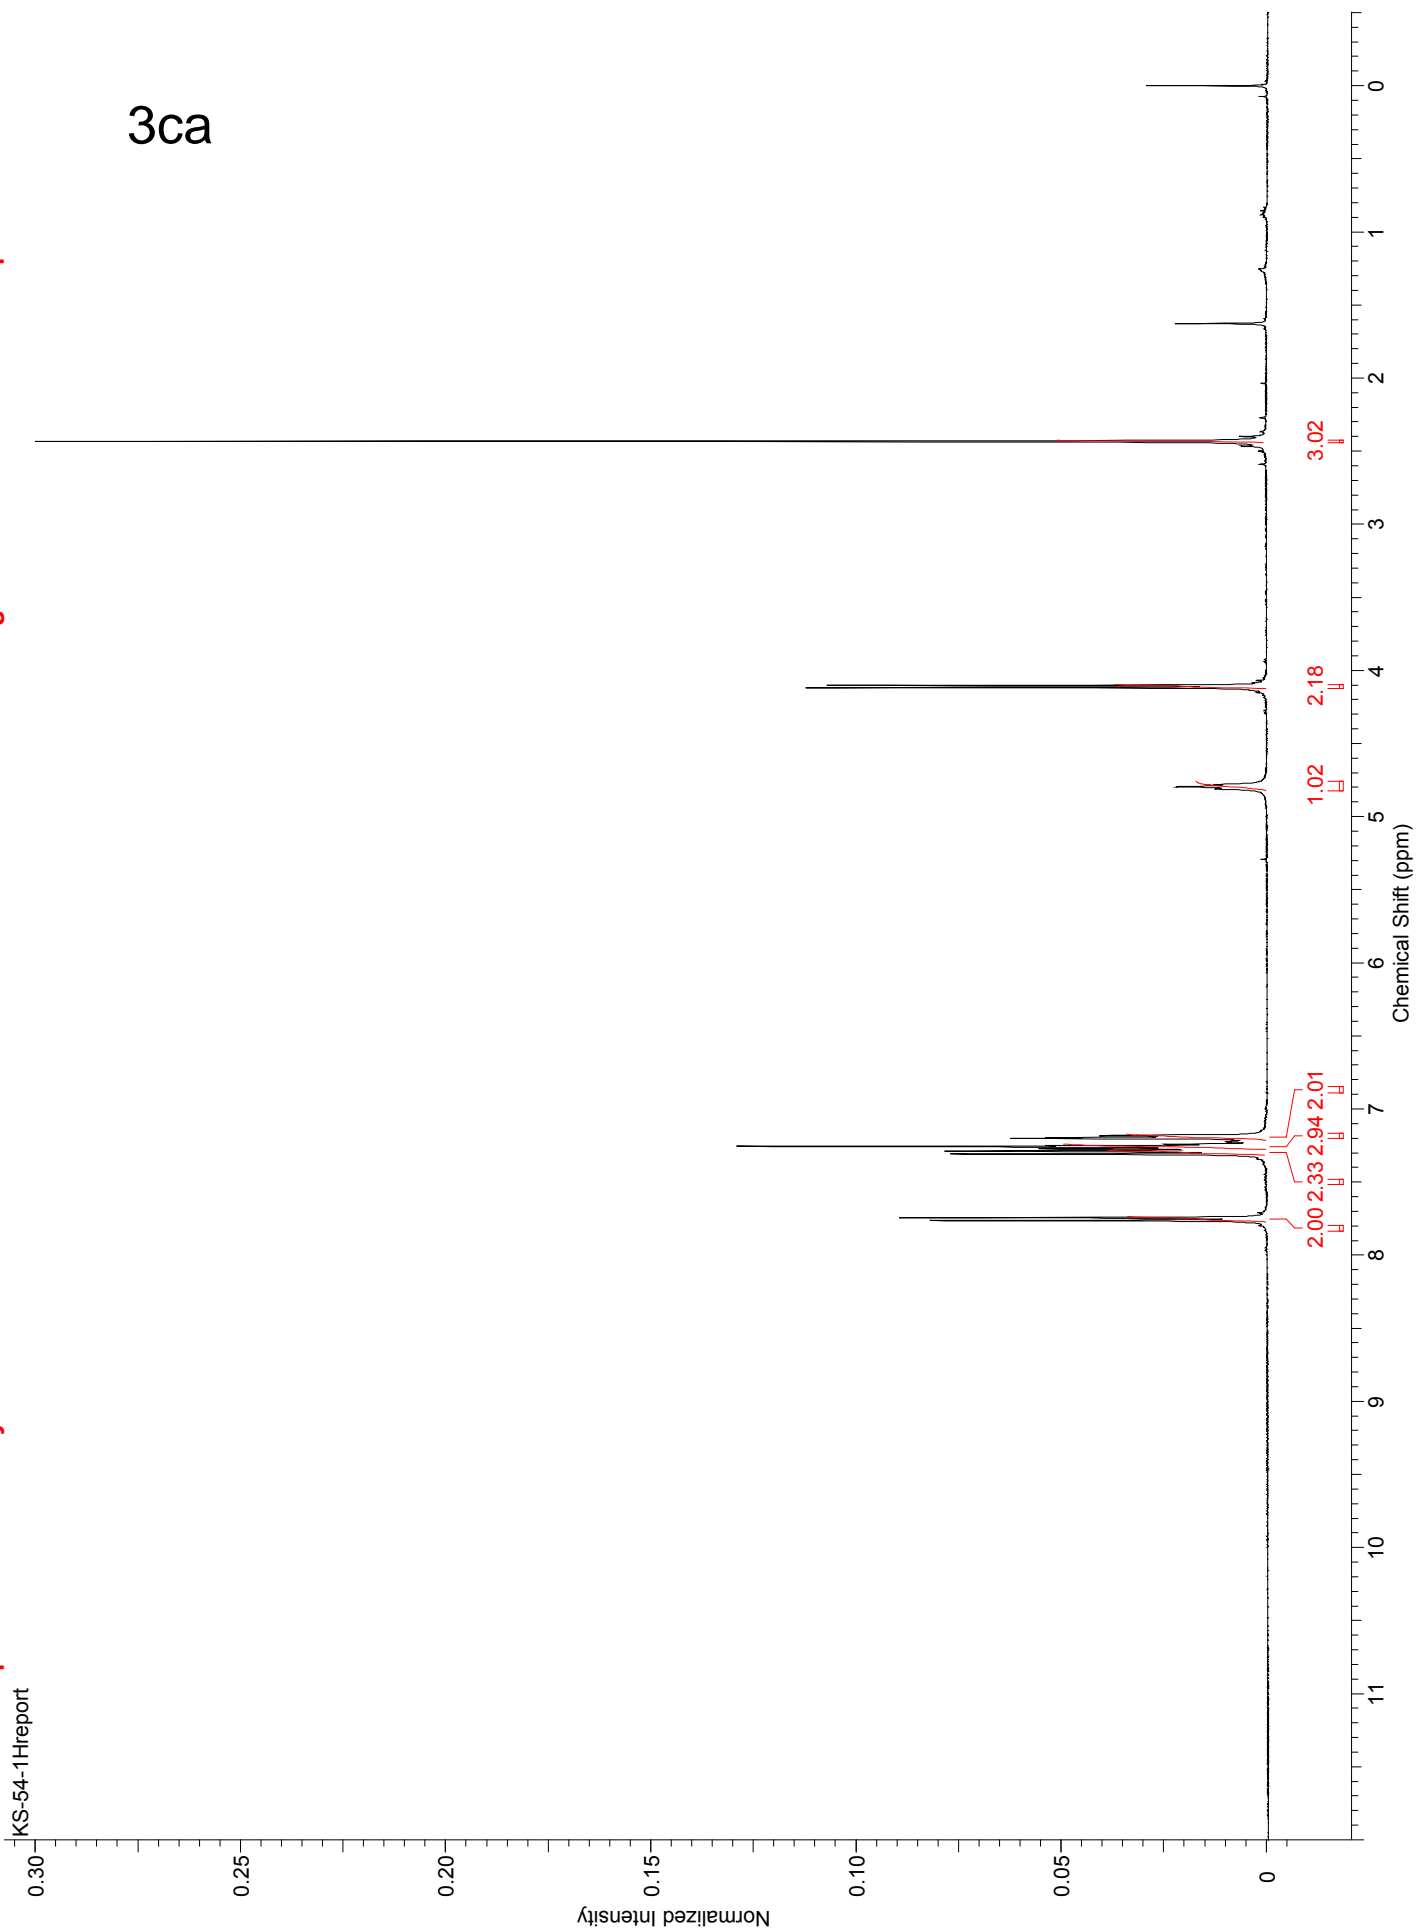

KS-54-13Creport

3ca

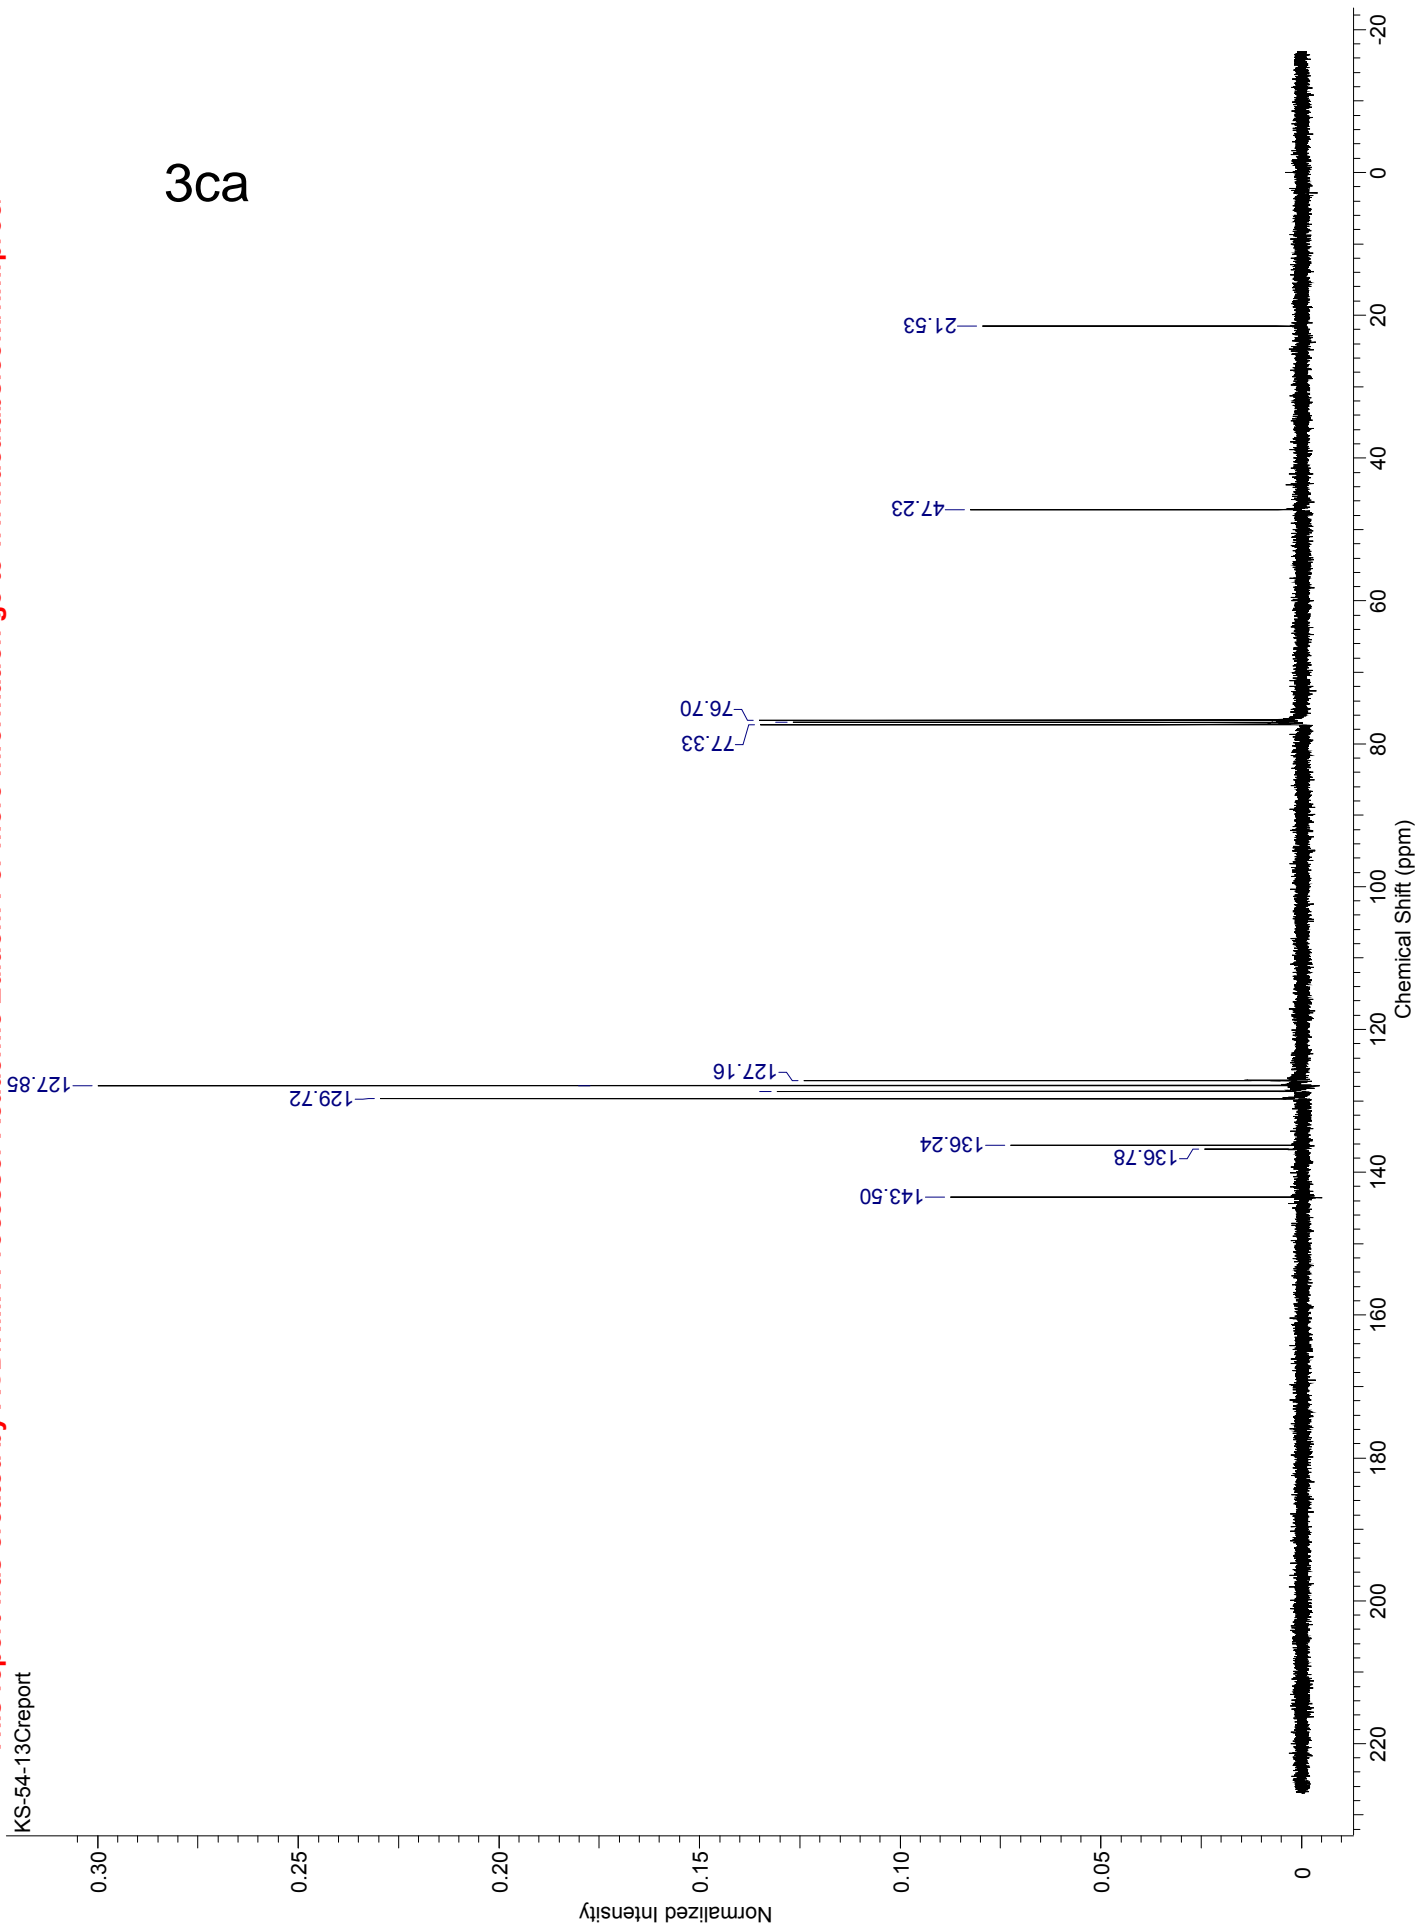

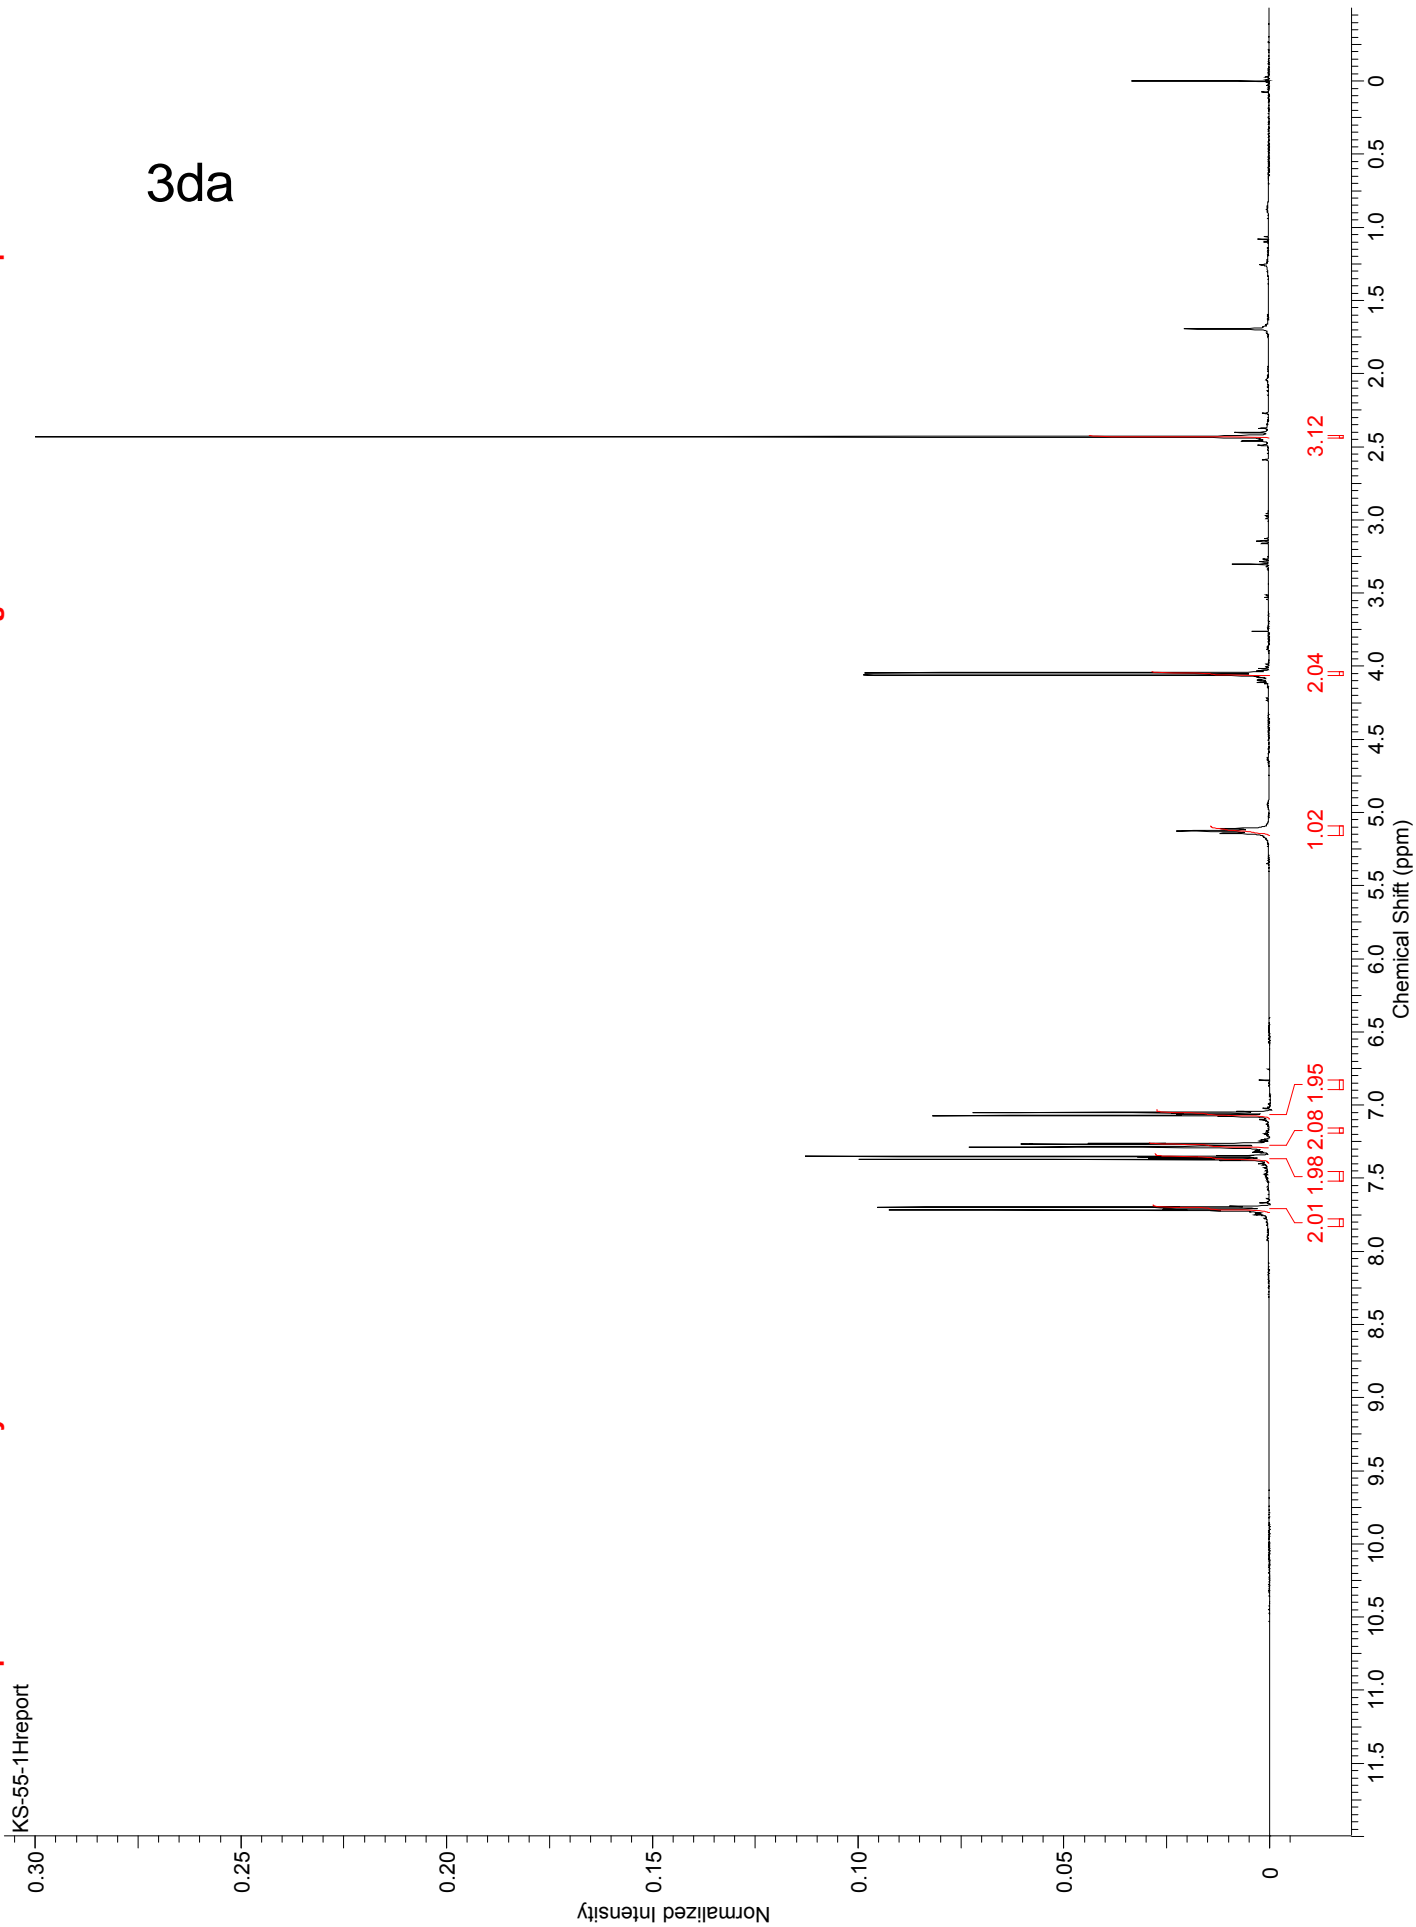

KS-55-13Creport

3da

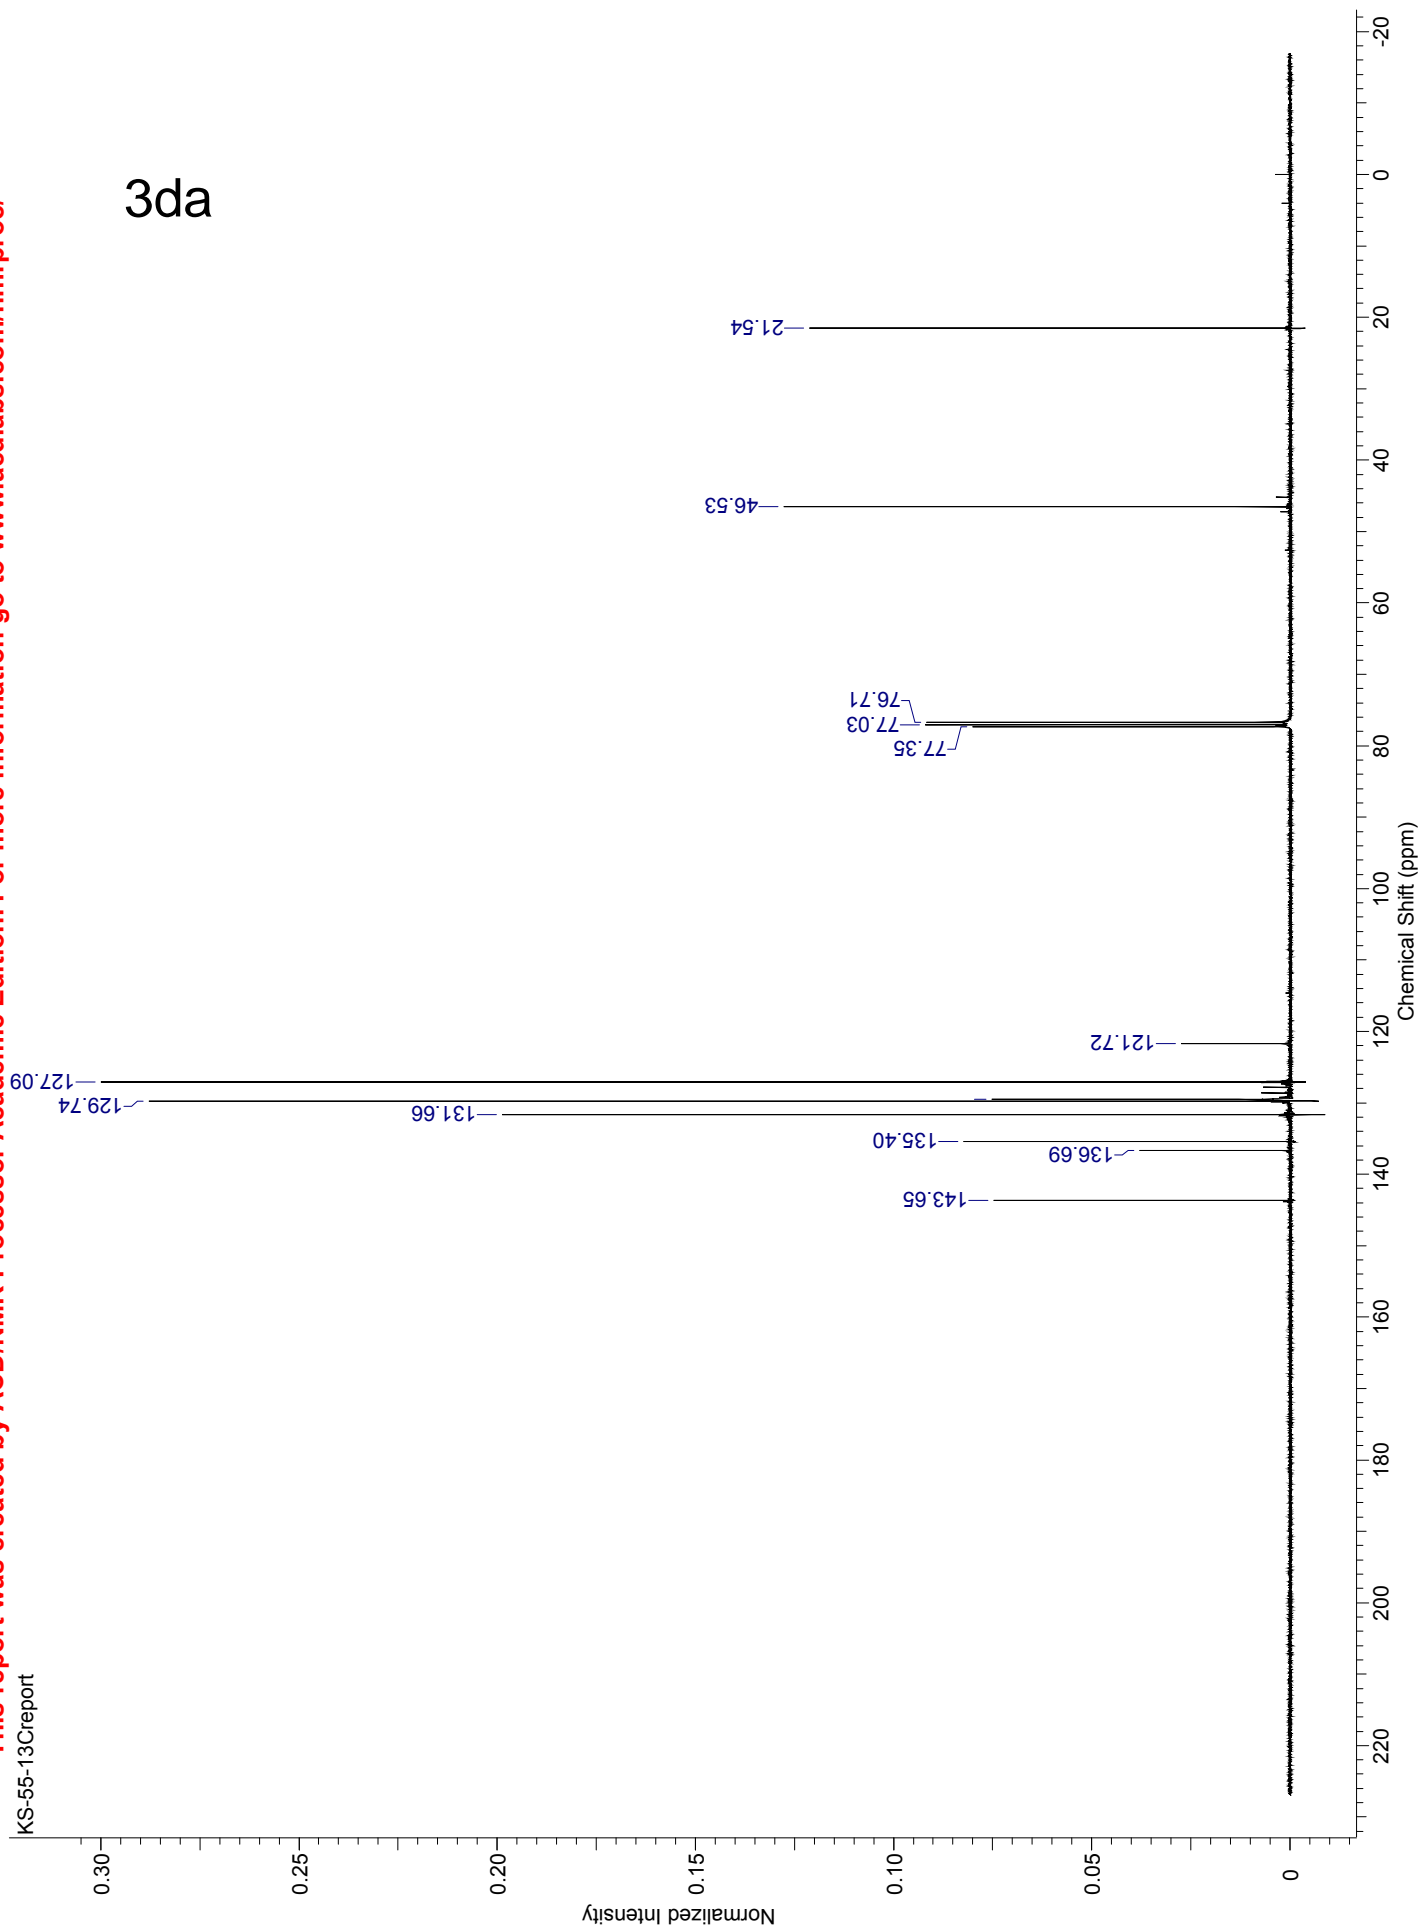

3ea

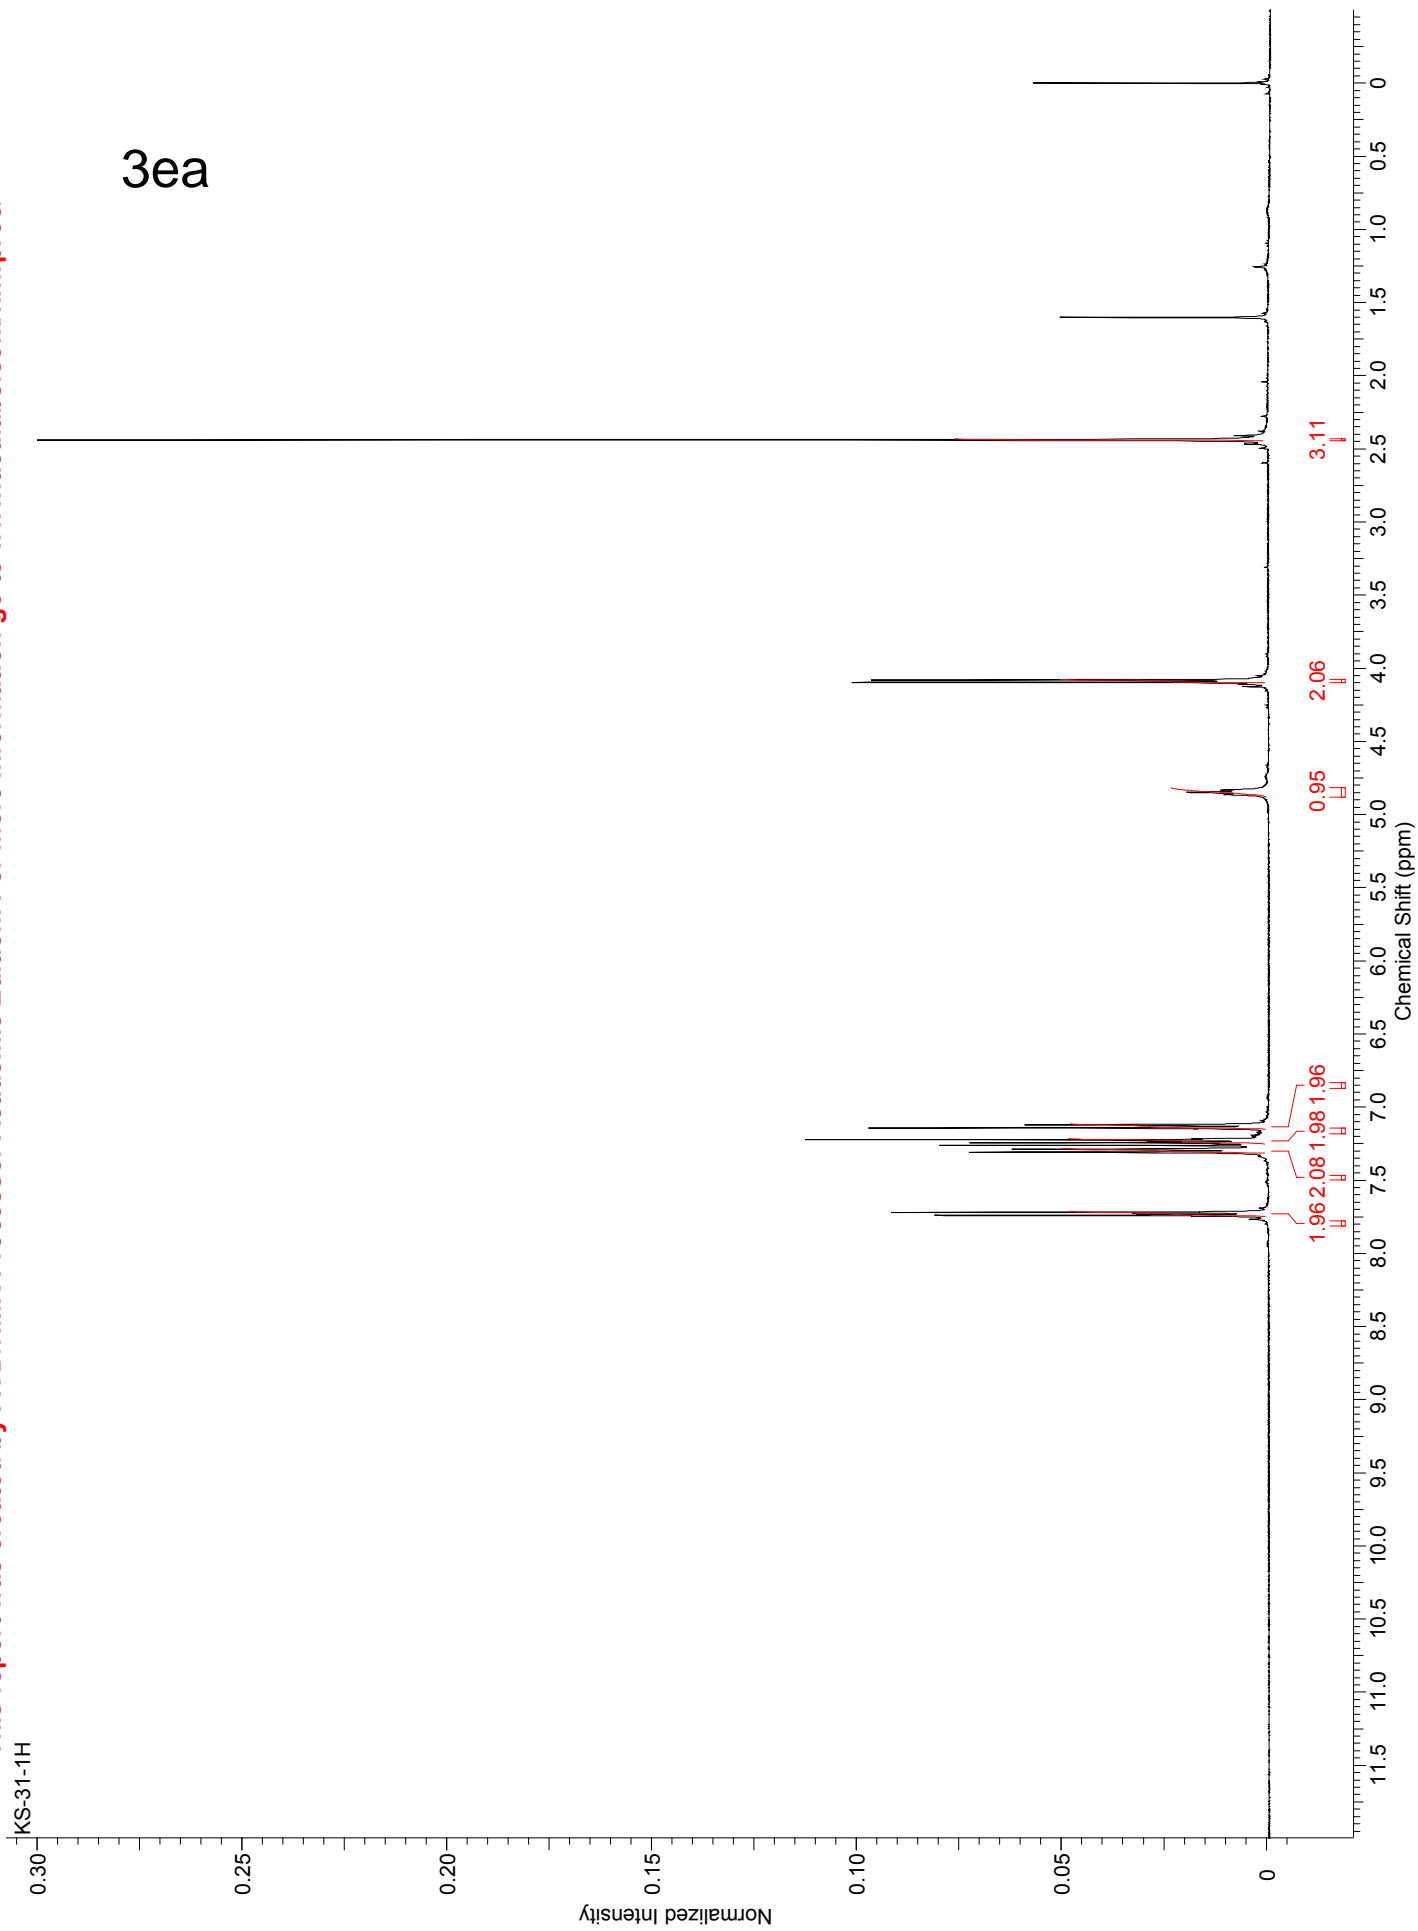



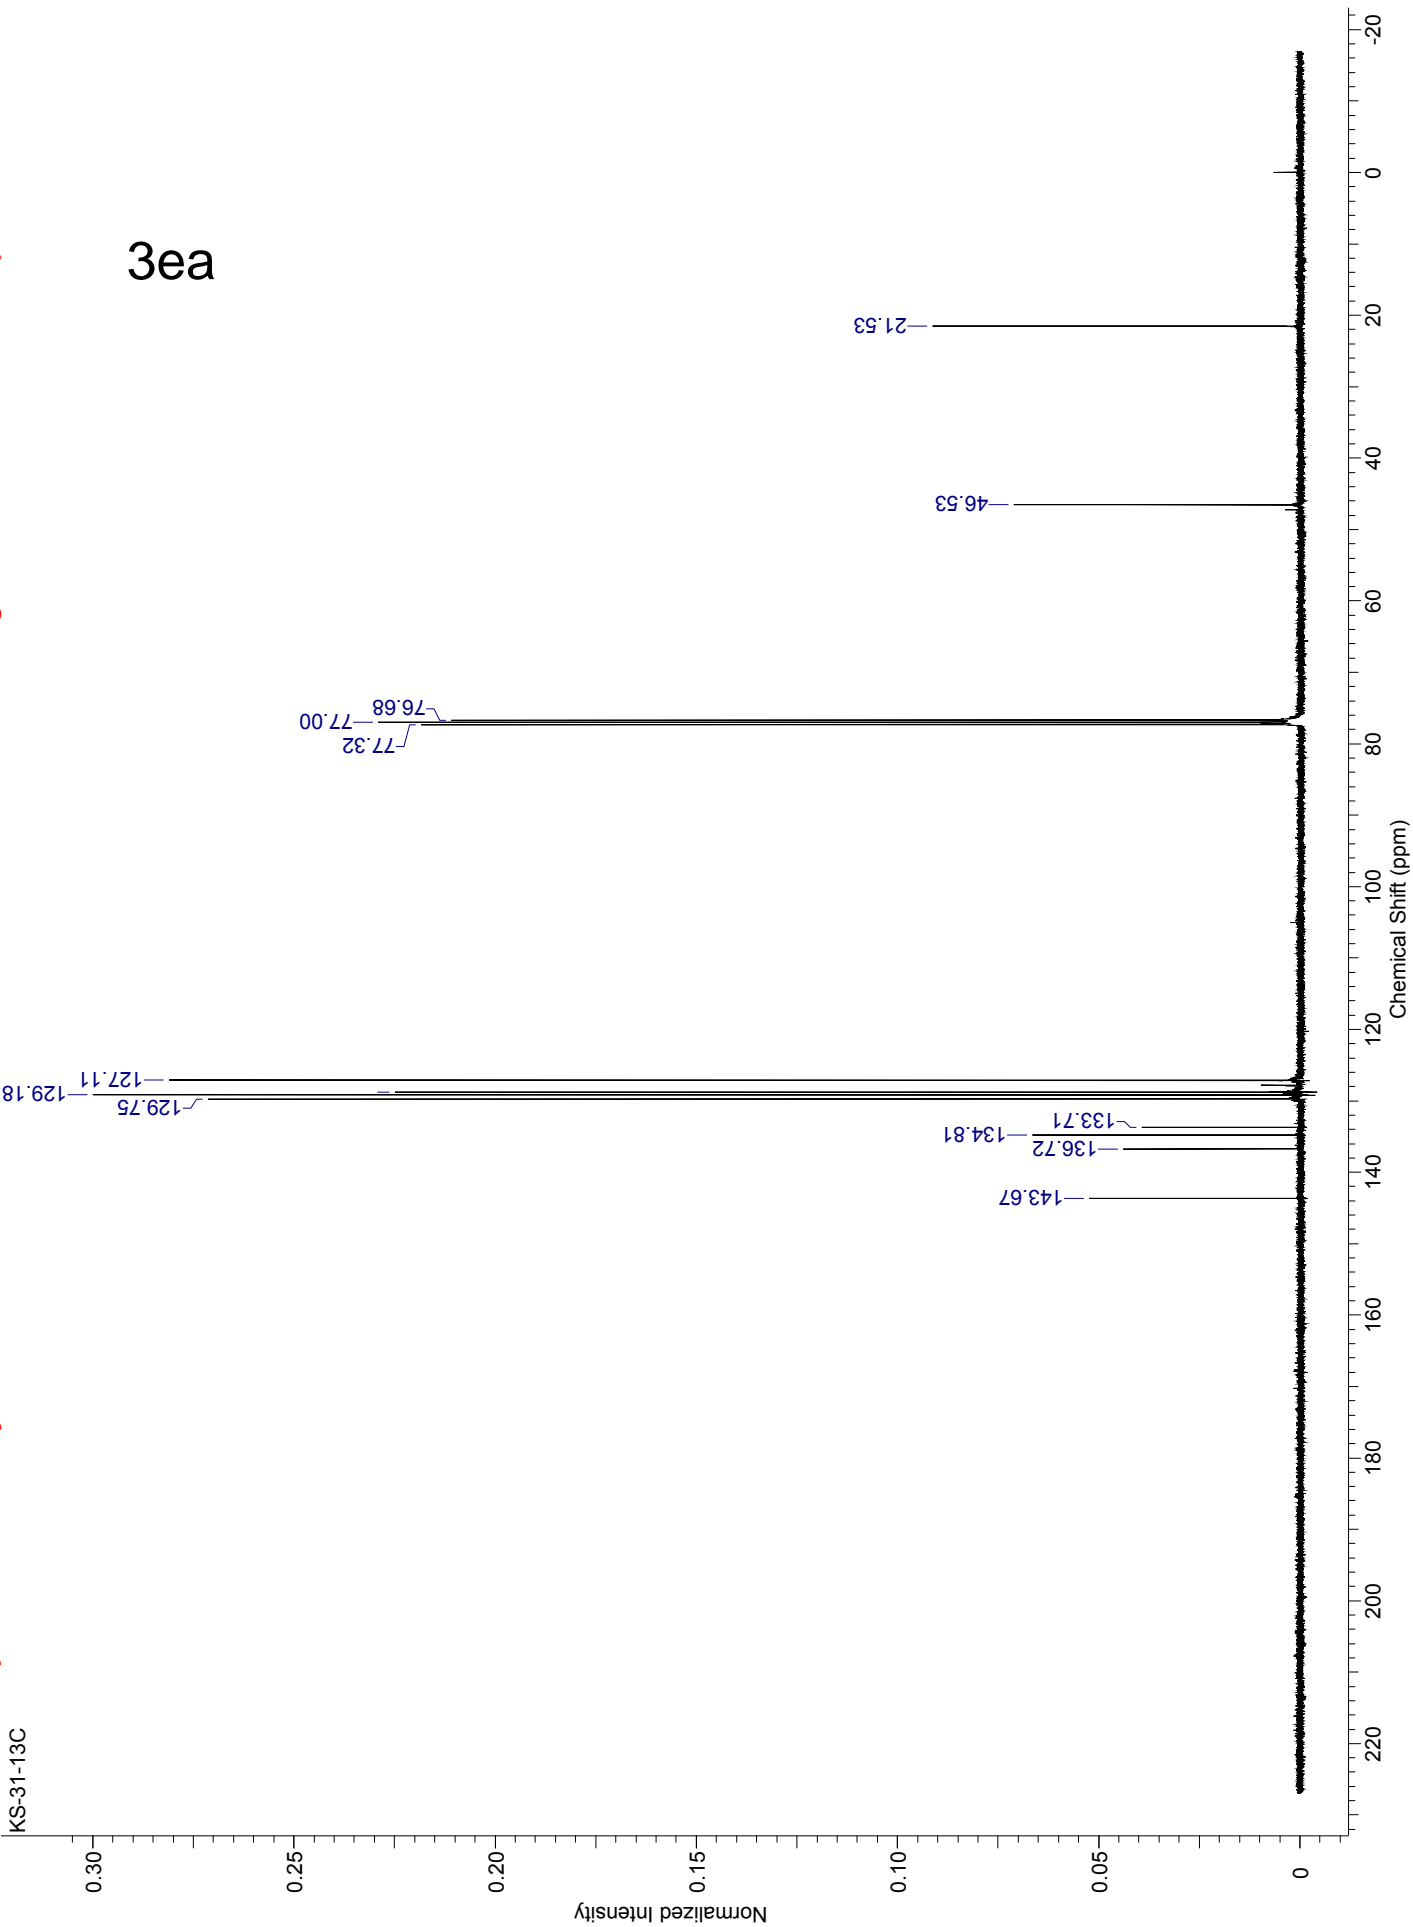

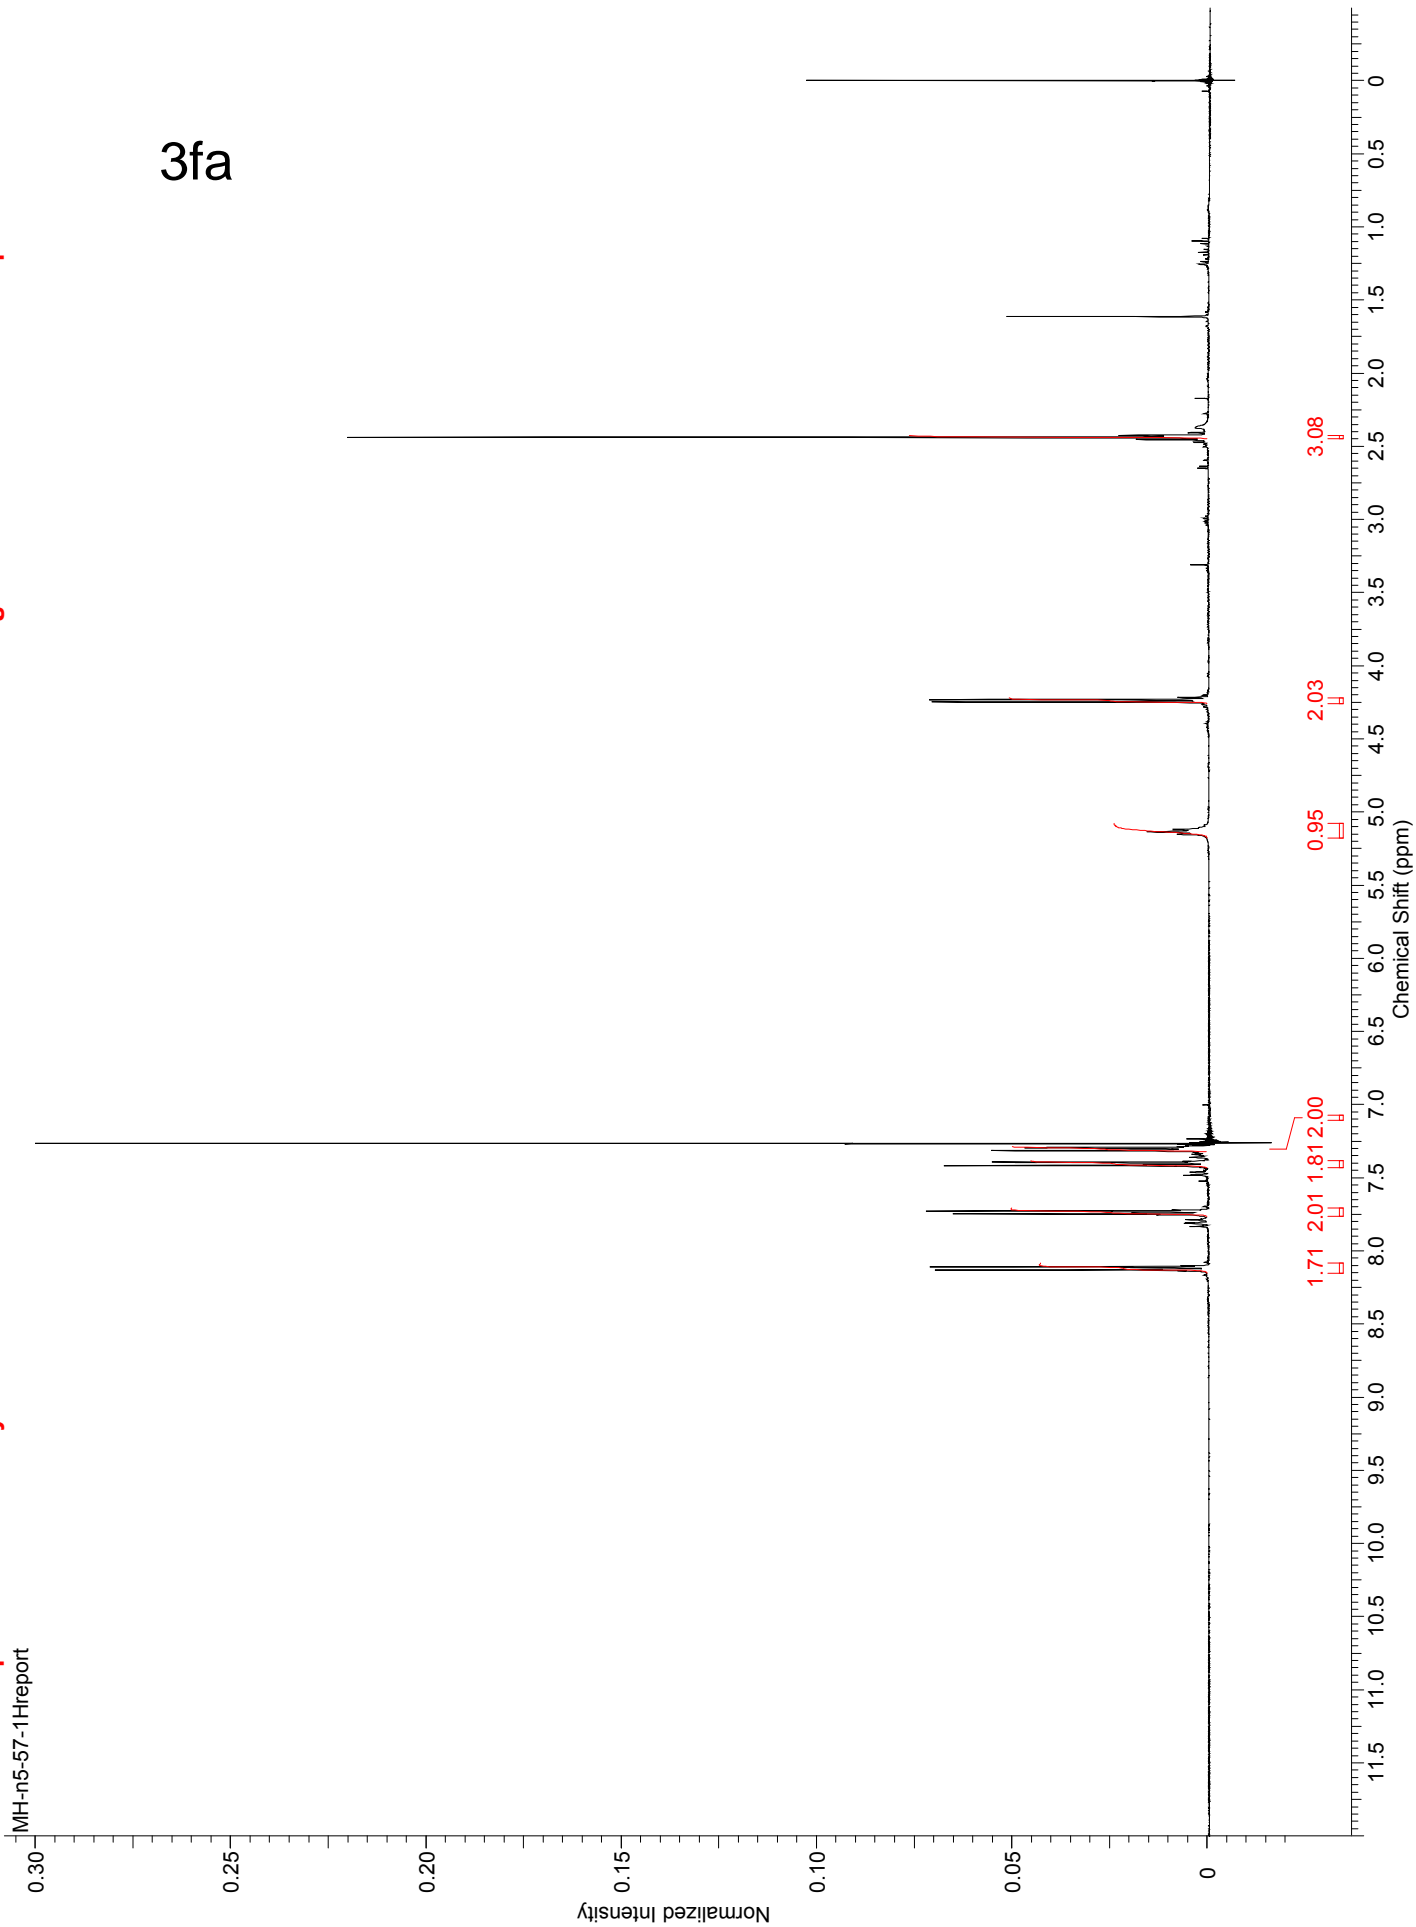

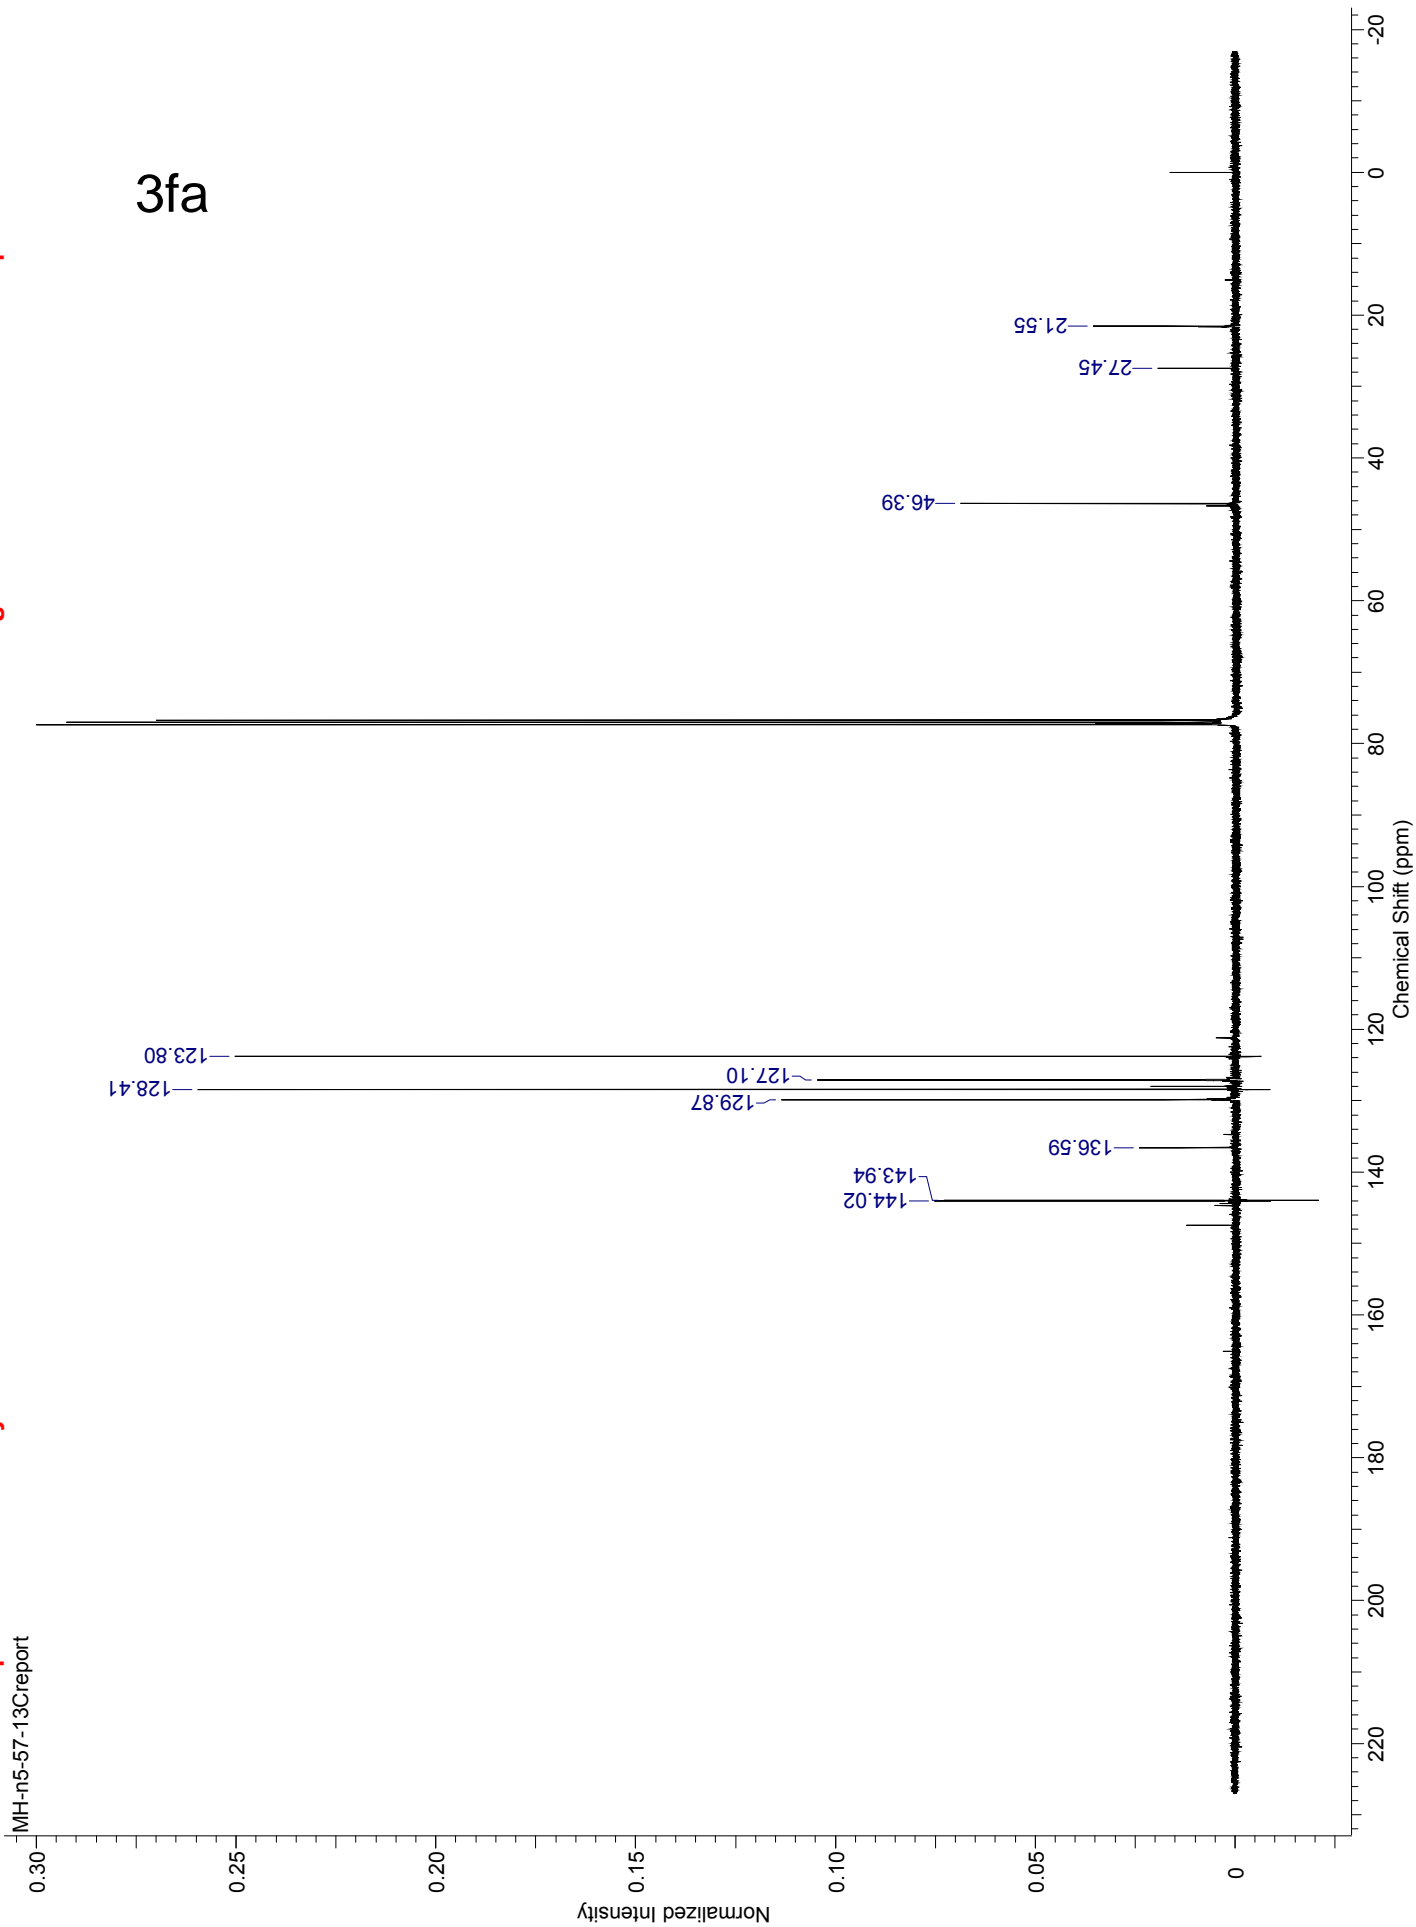

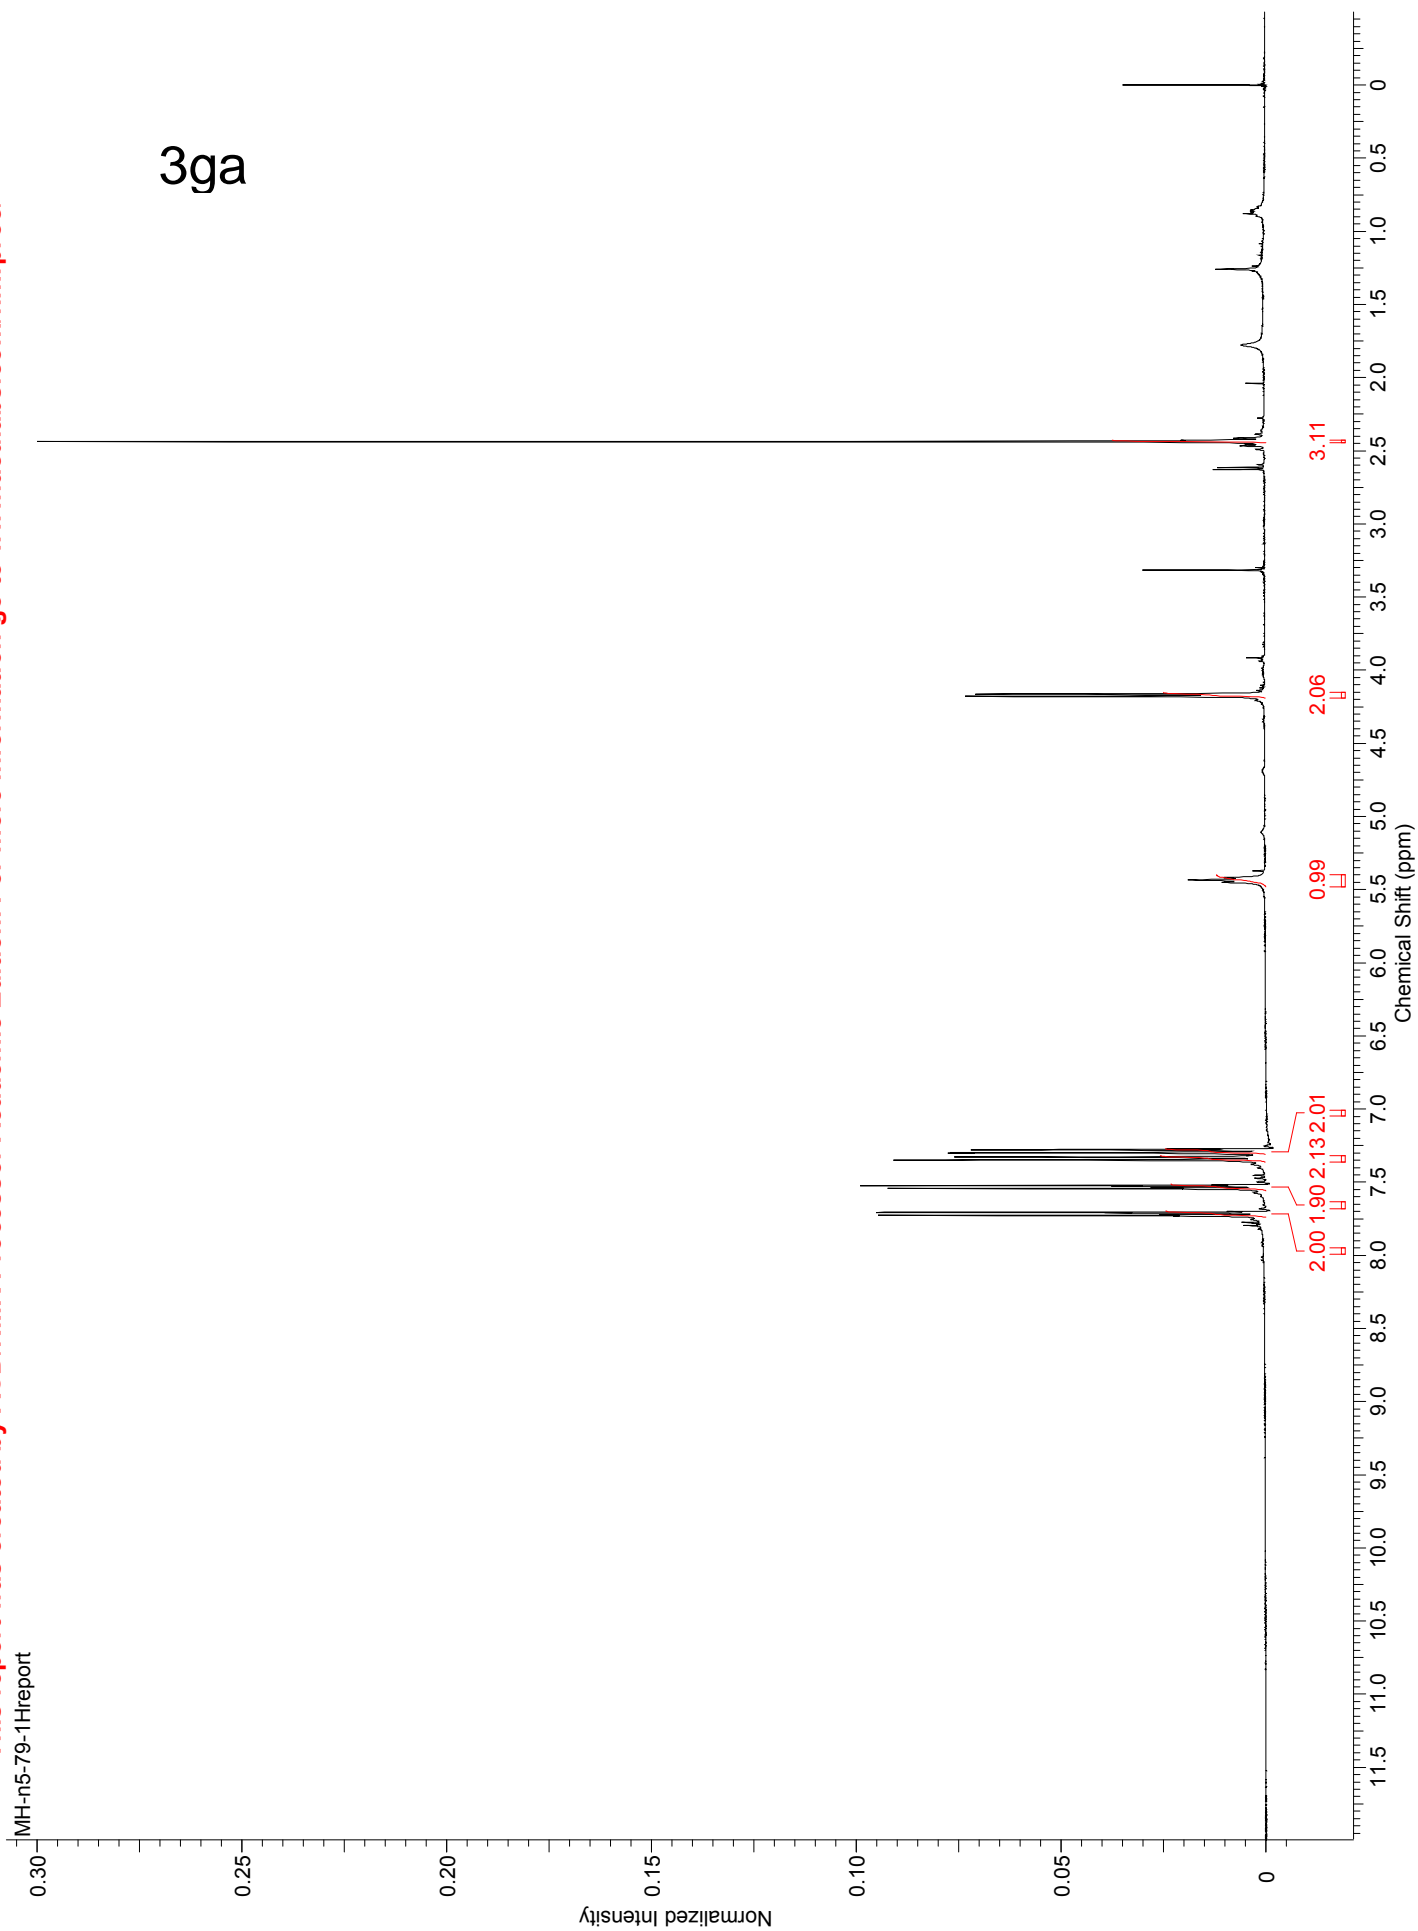

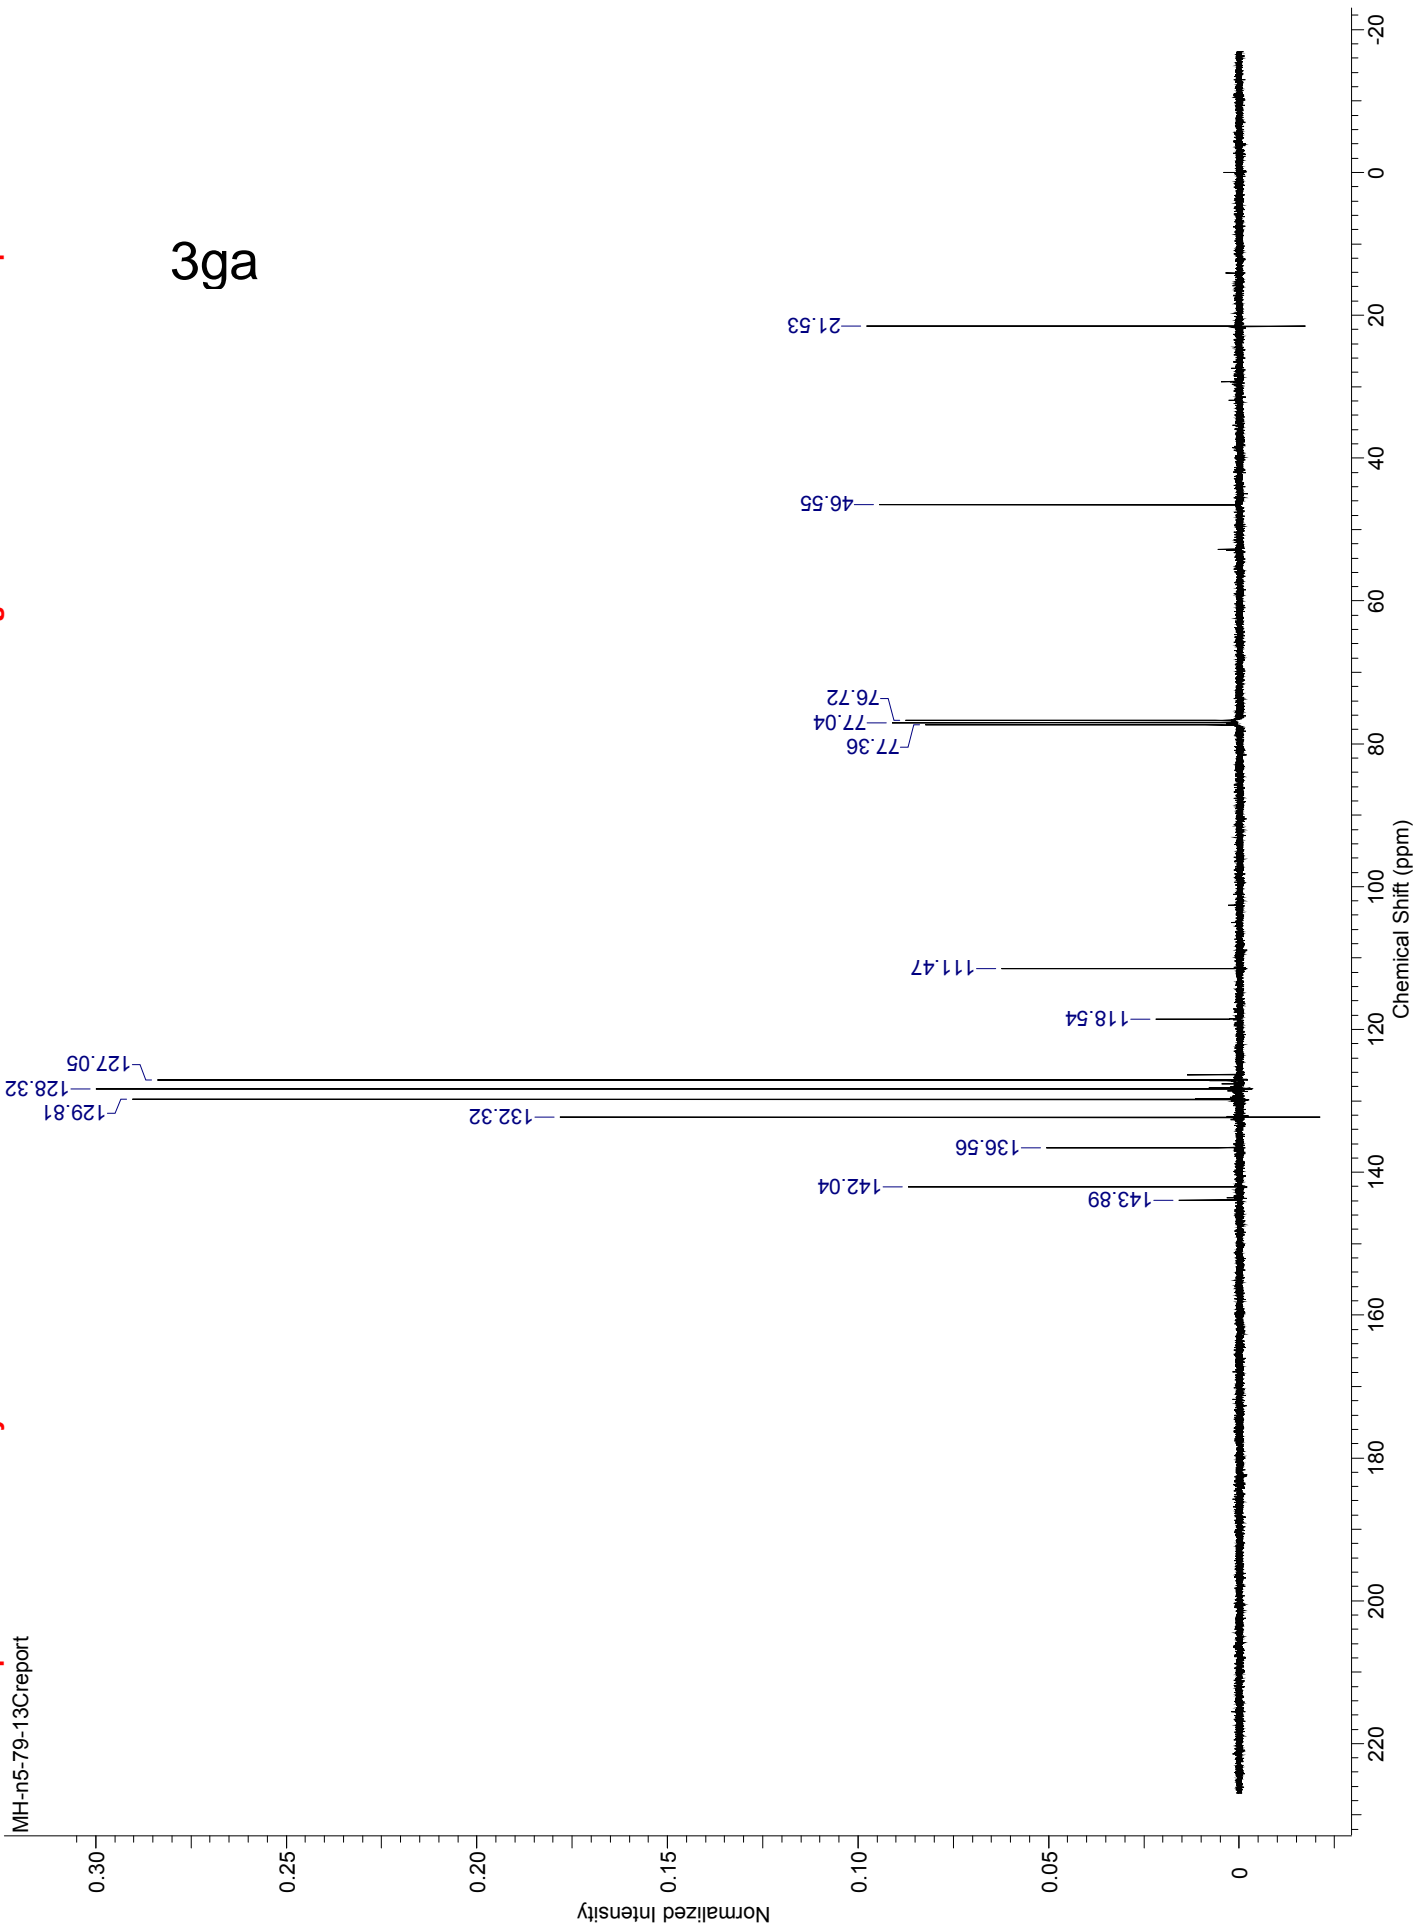

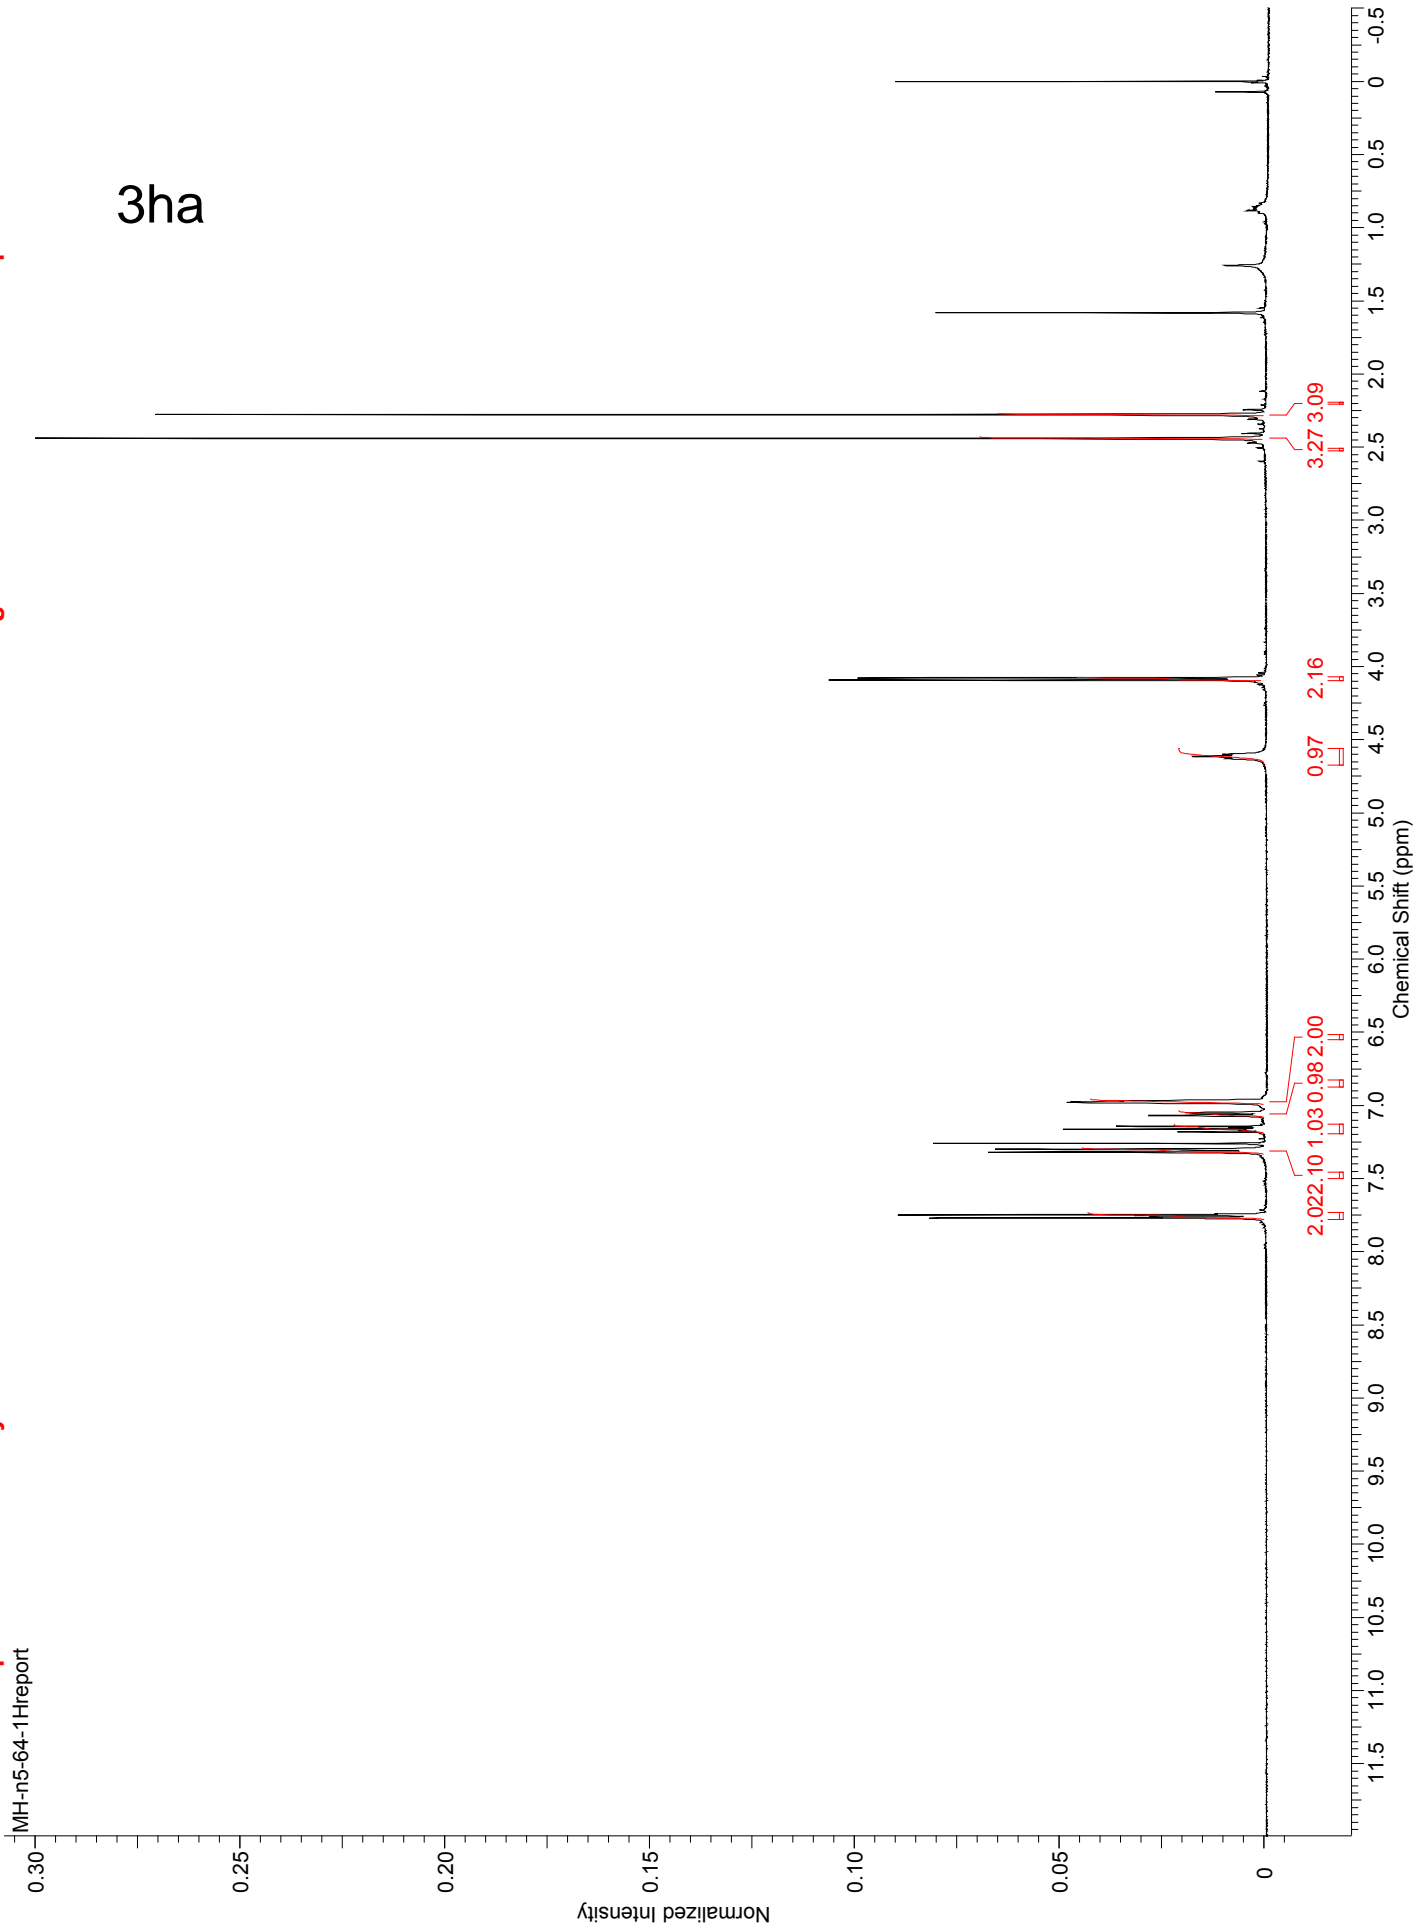

MH-n5-64-13Creport

3ha

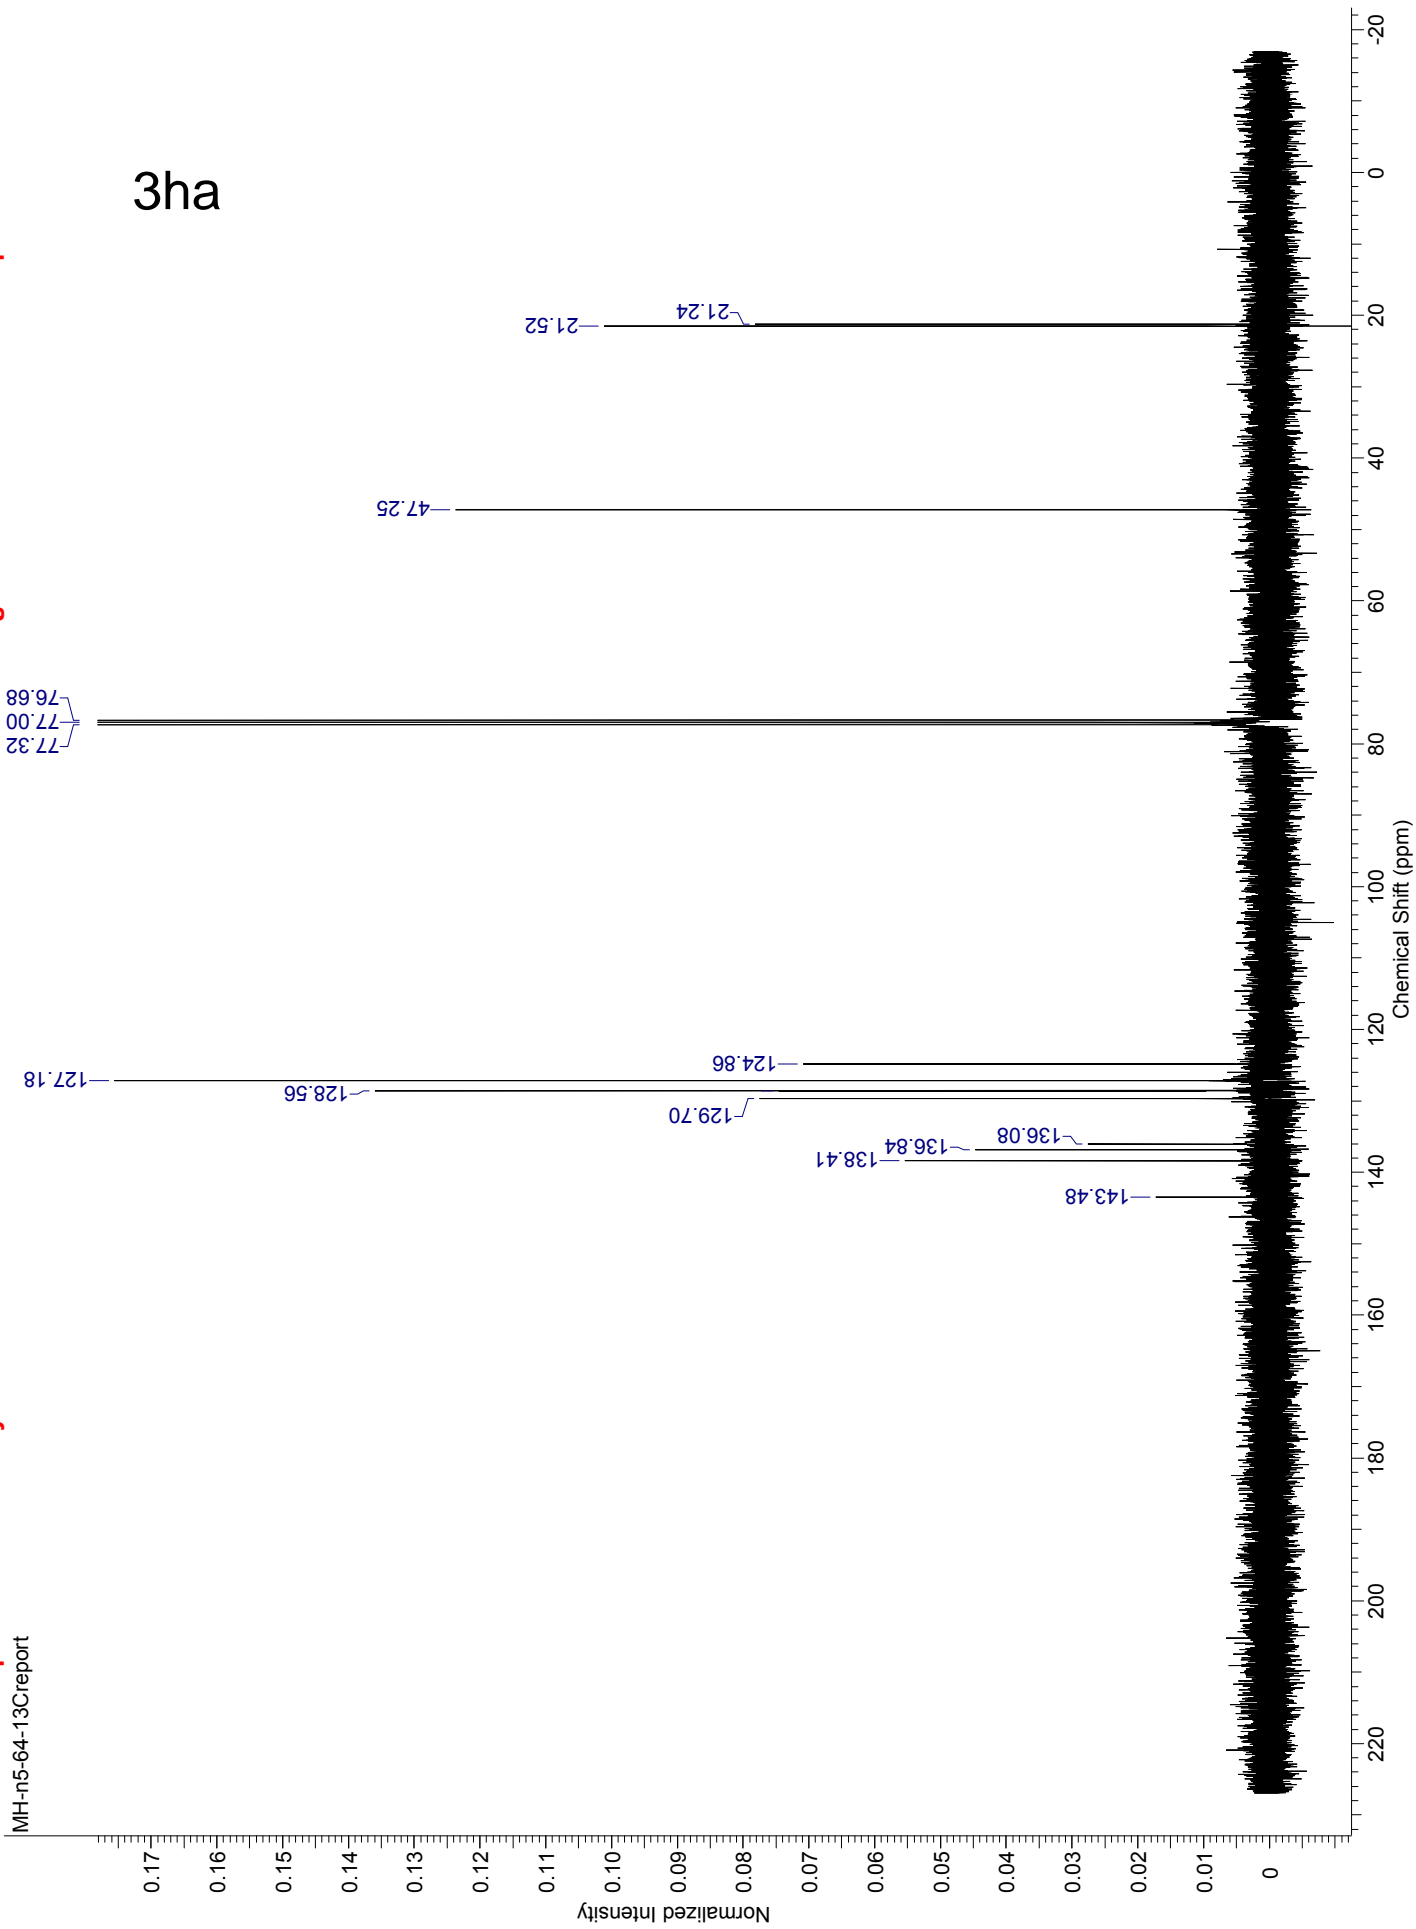

KS-34-1Hreport

3ia

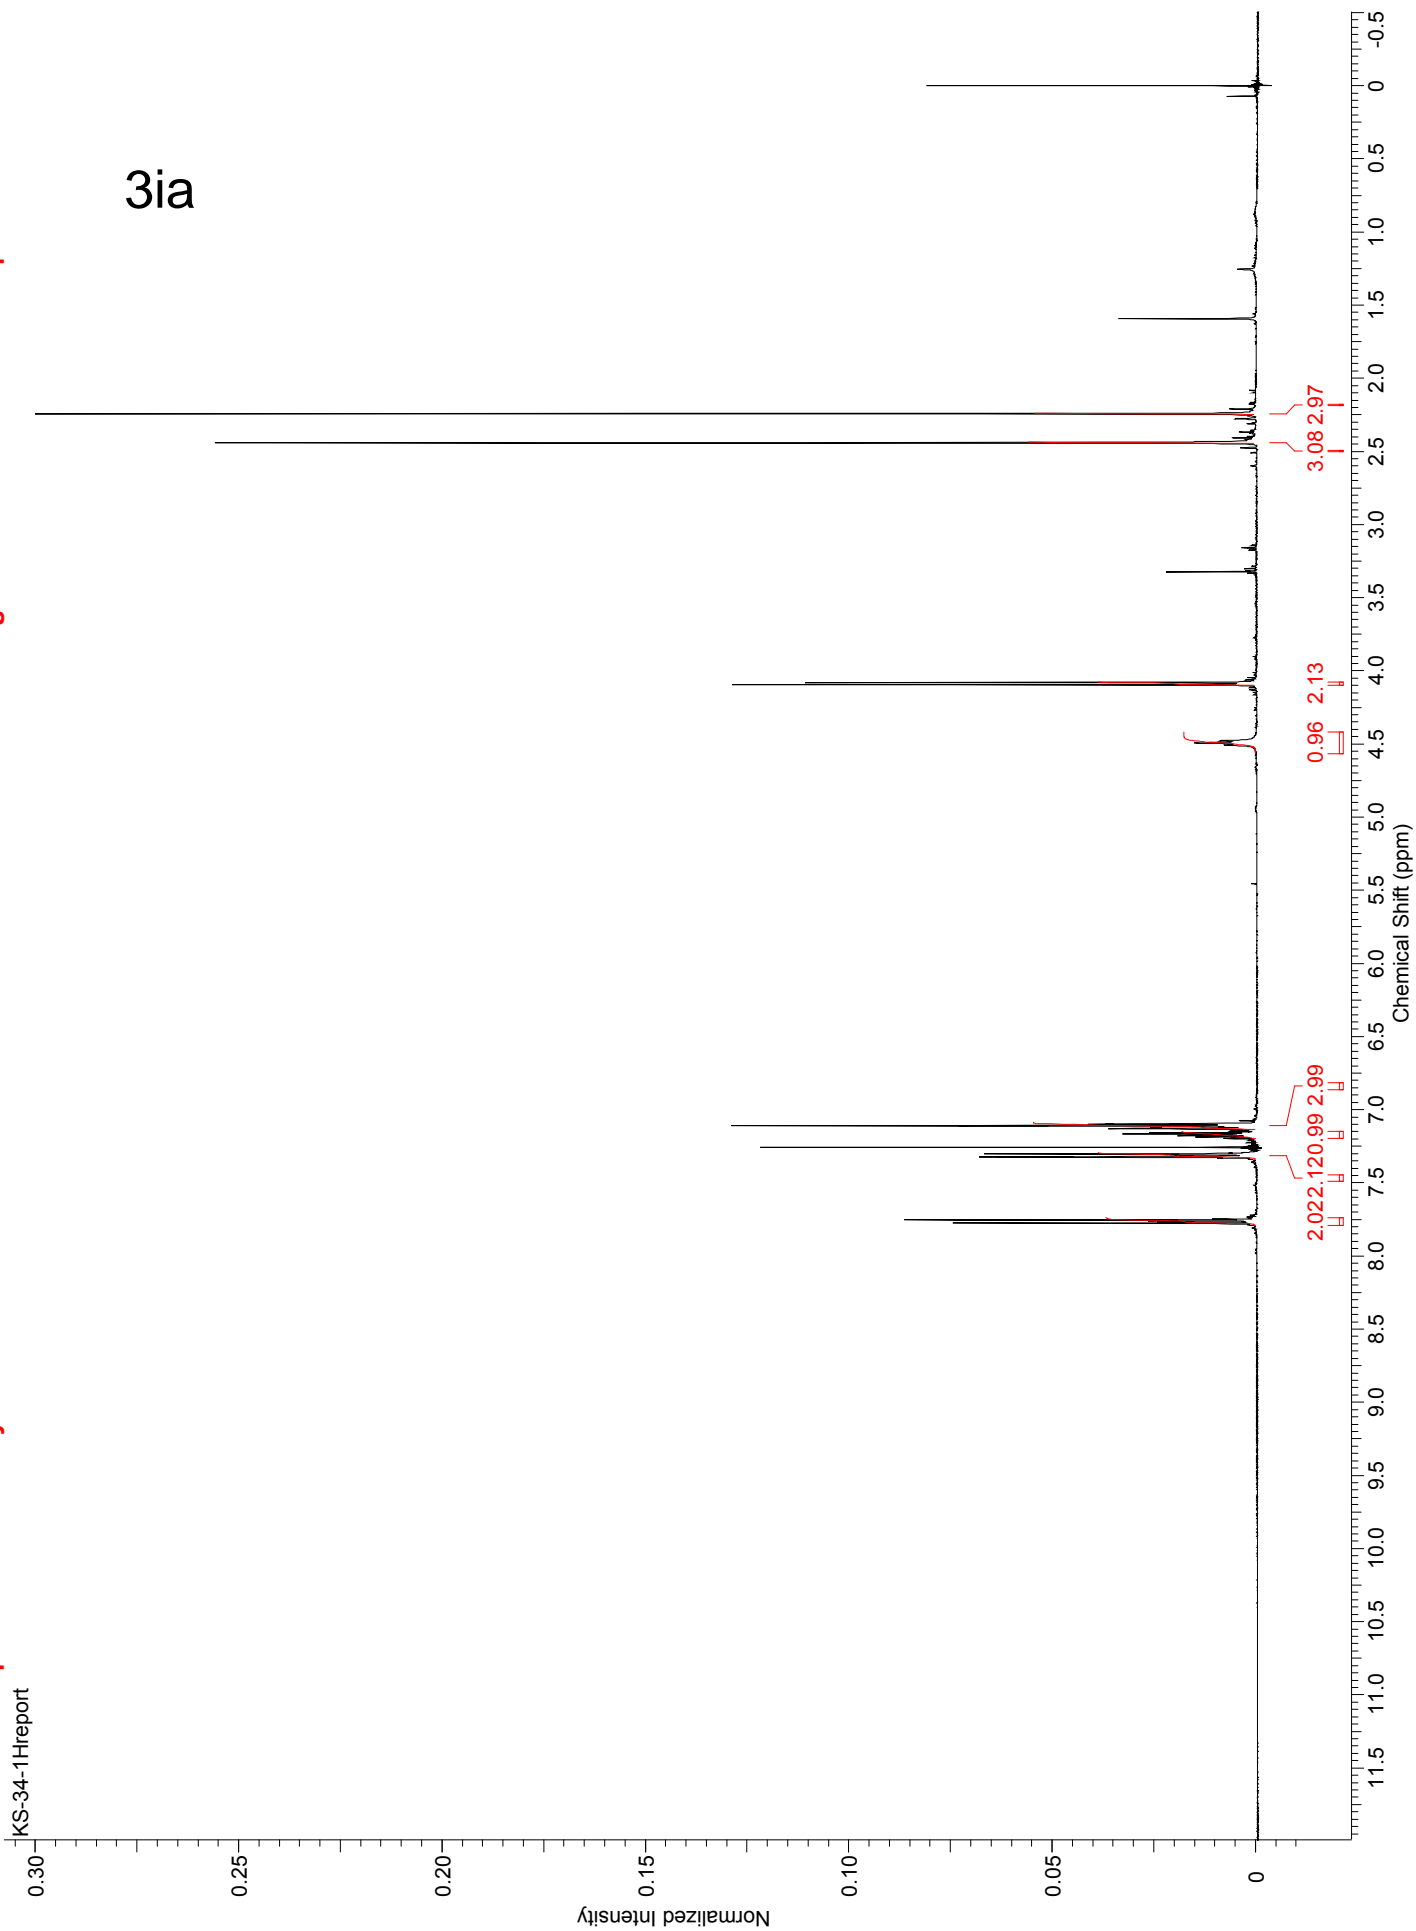



KS-34-13Creport

3ia

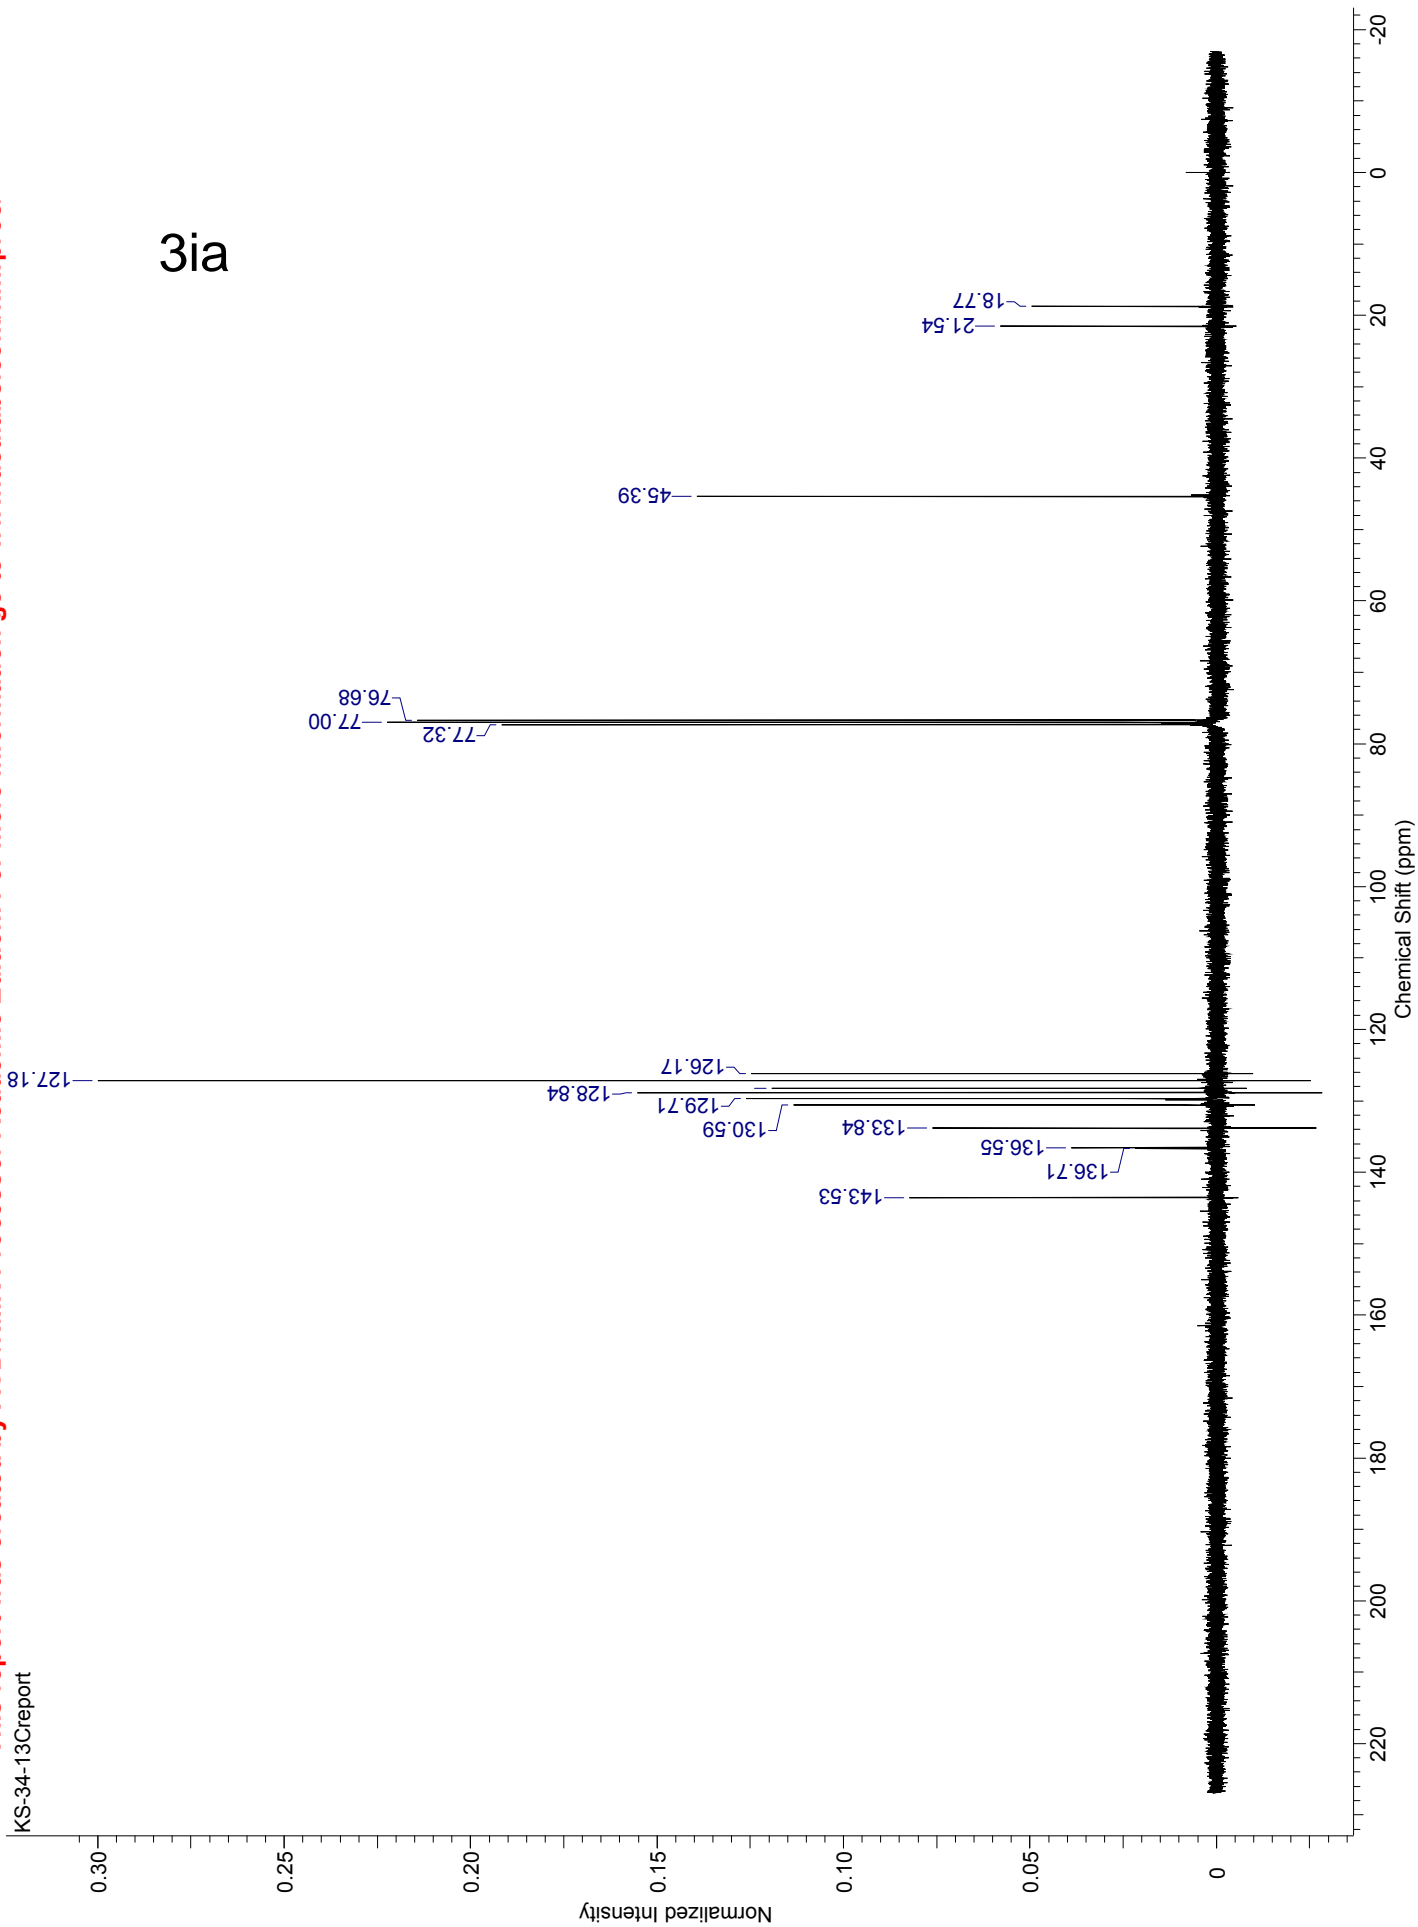

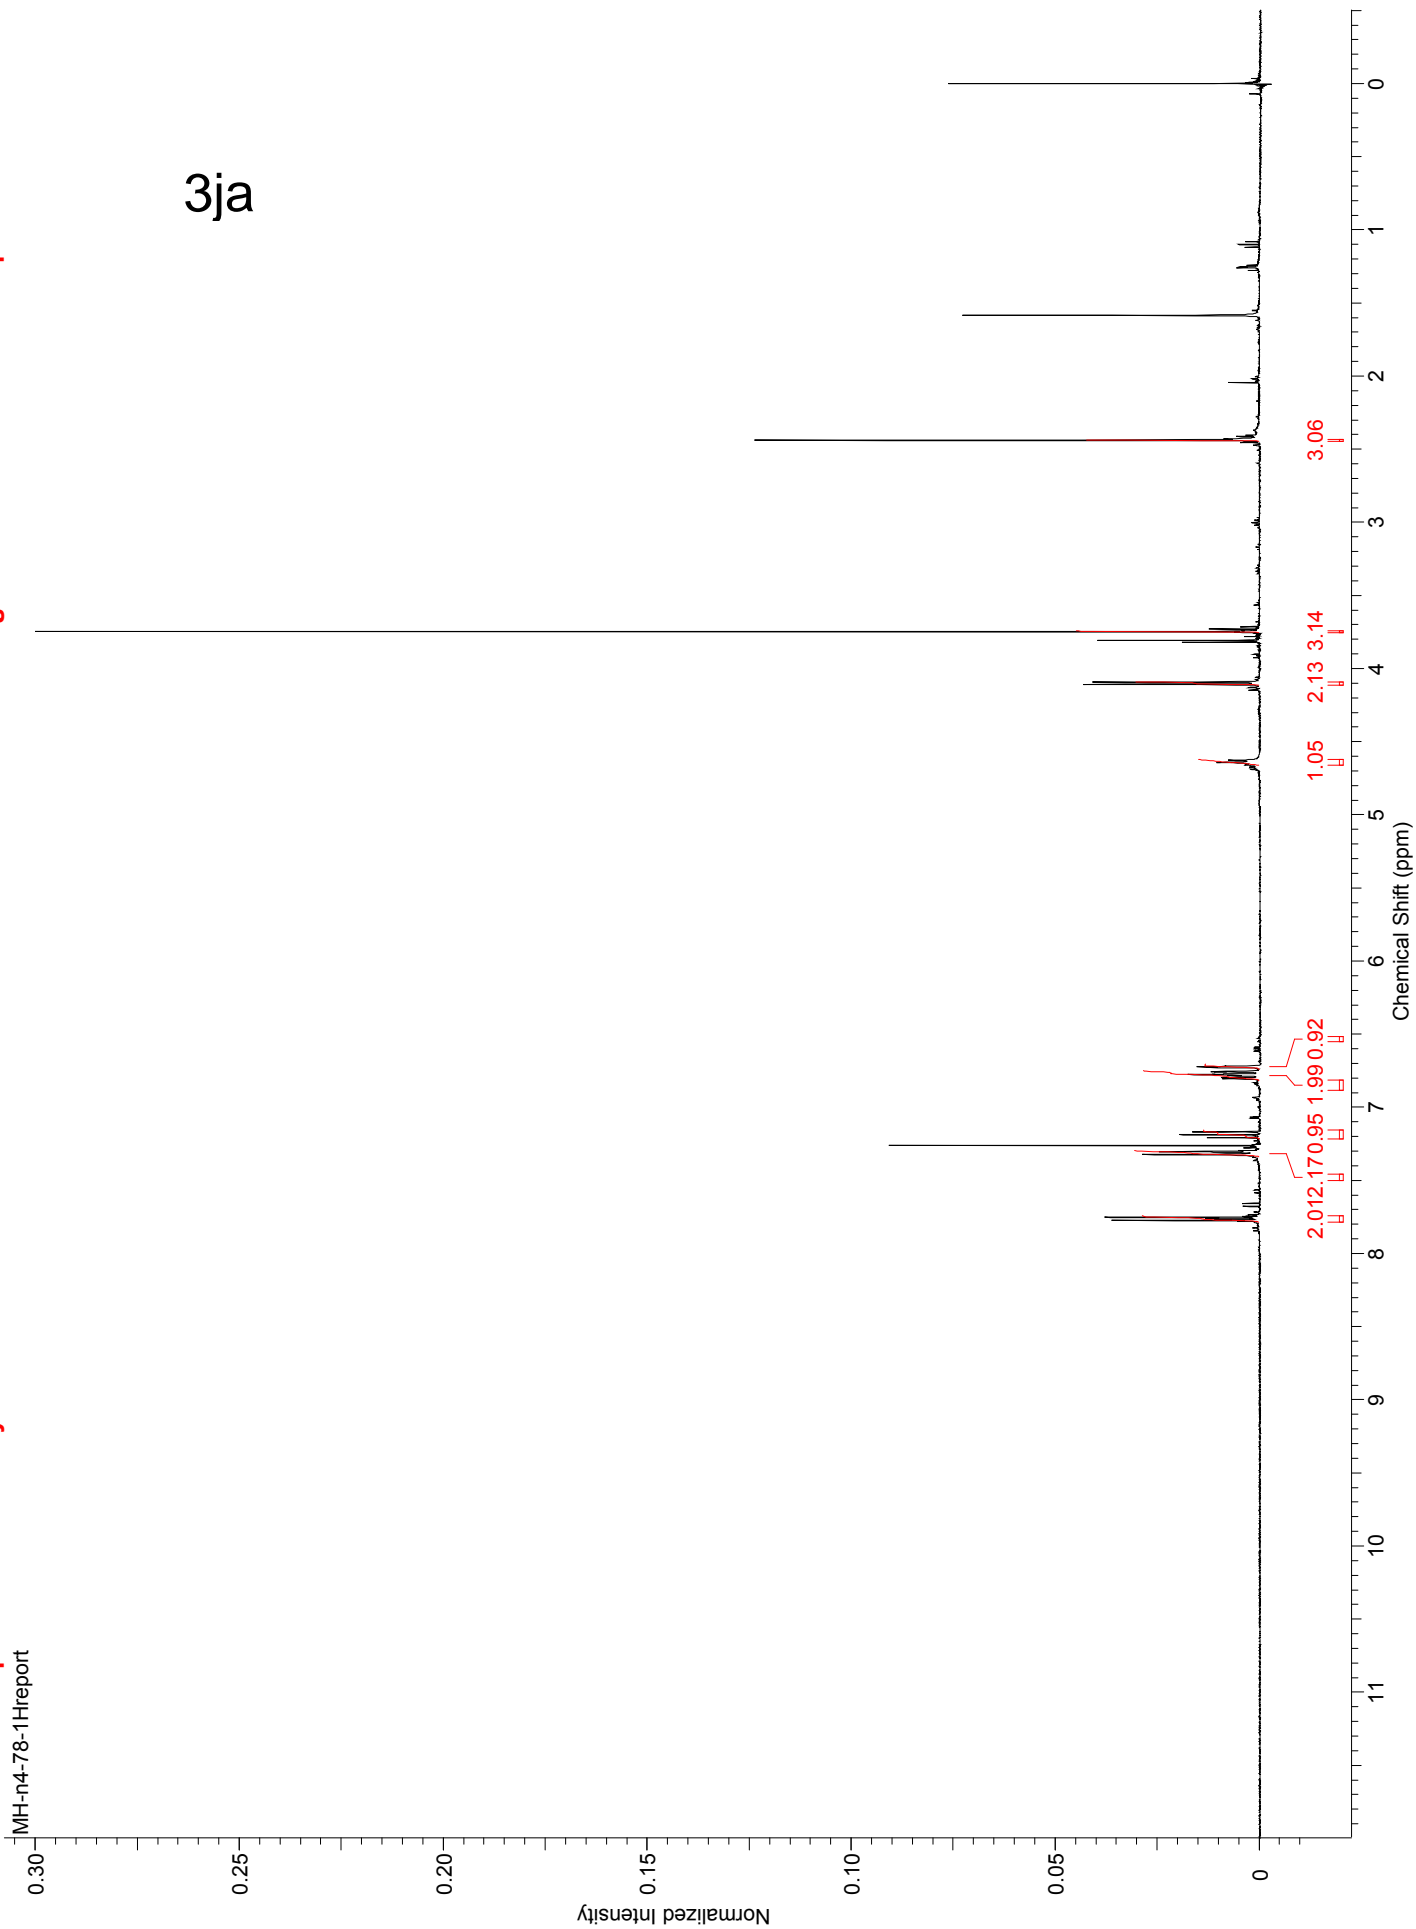

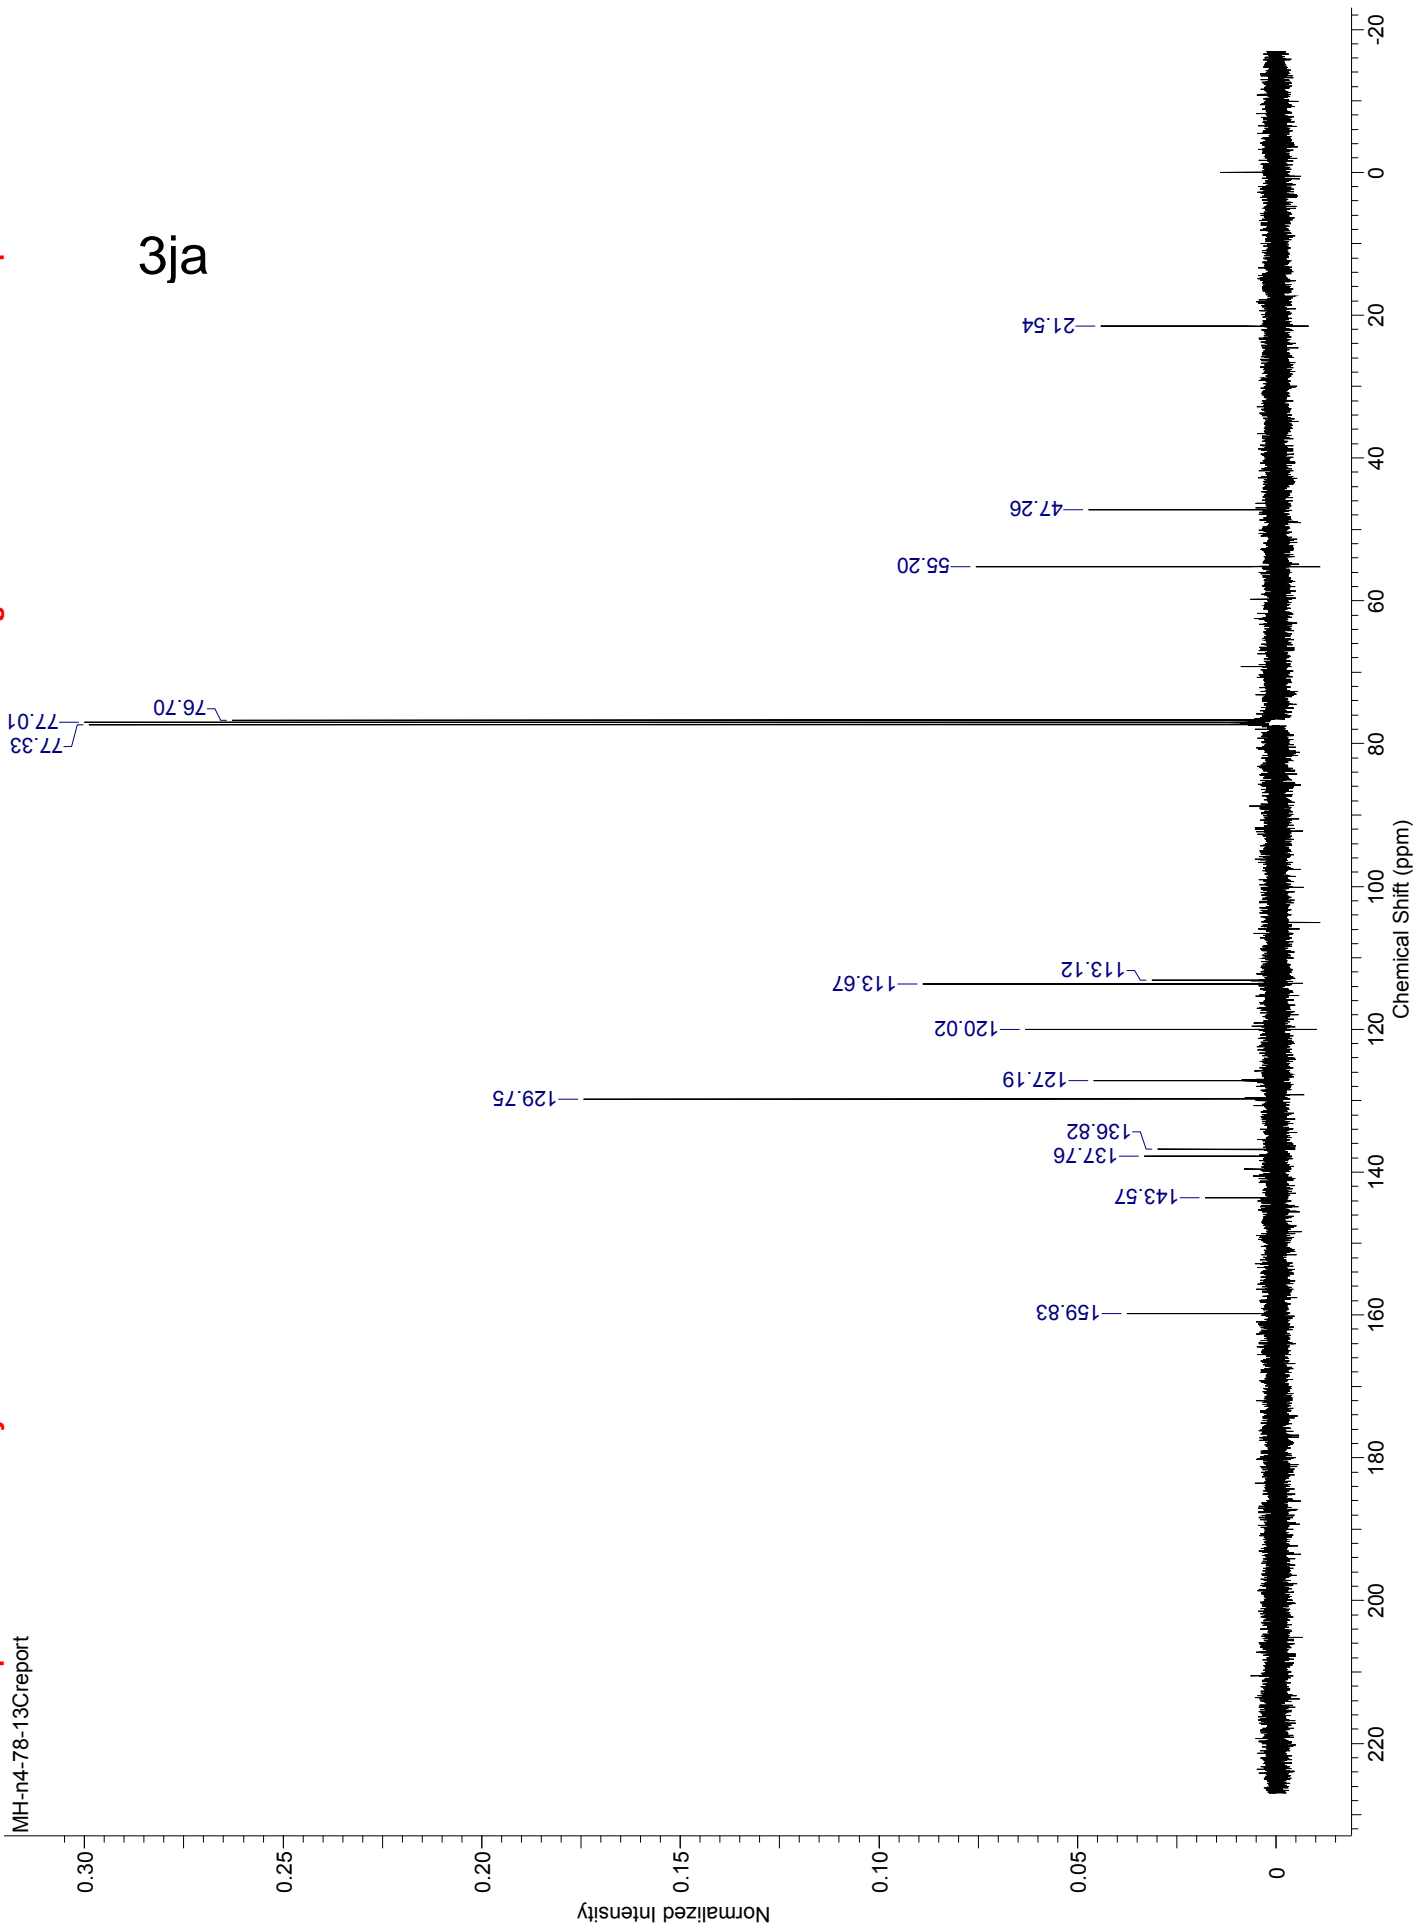

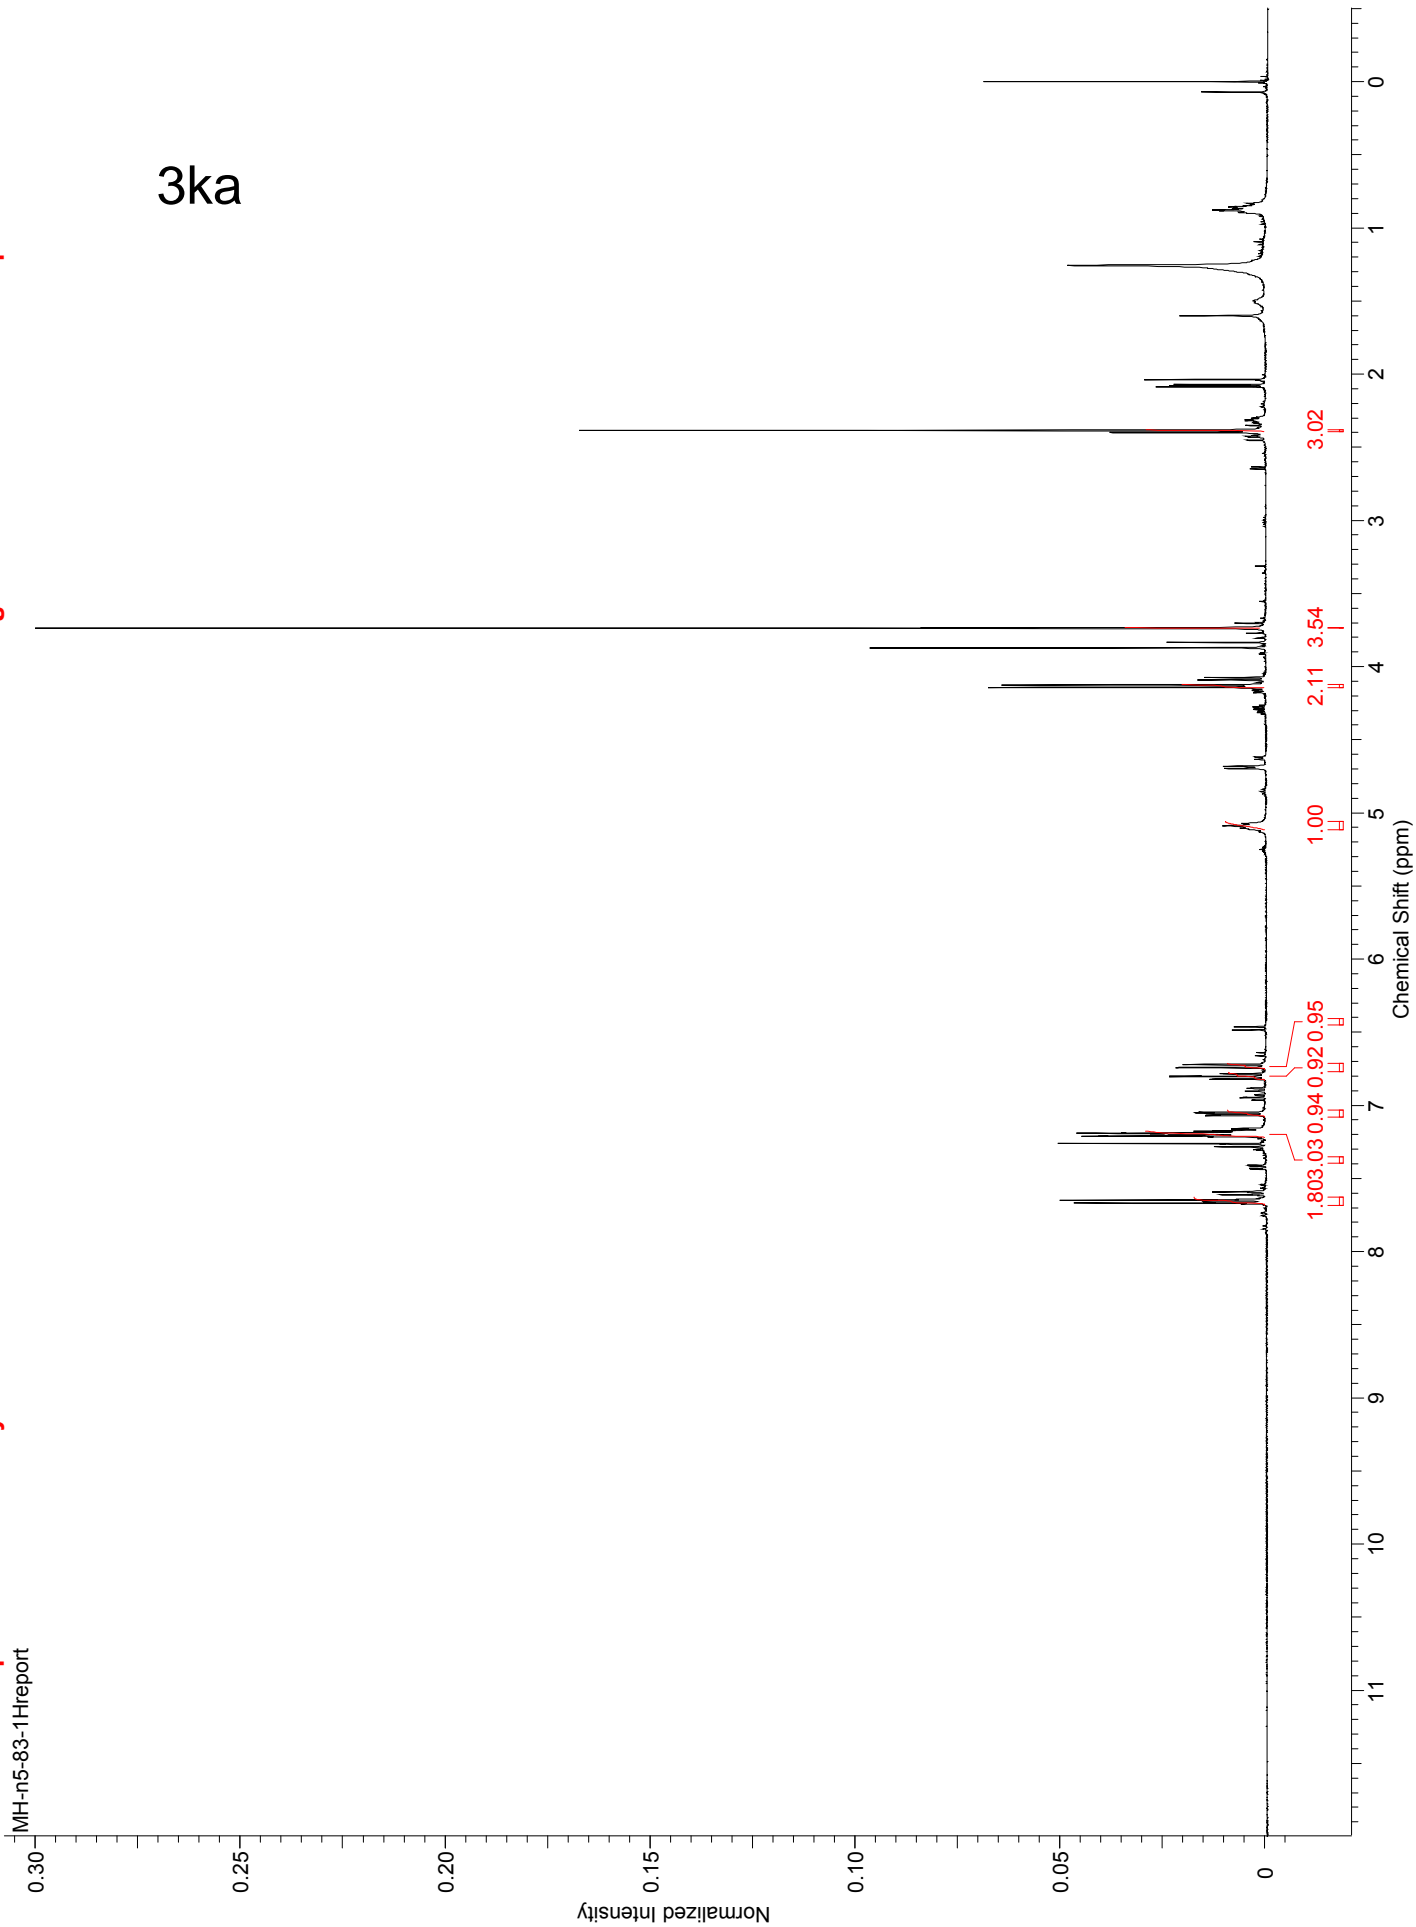

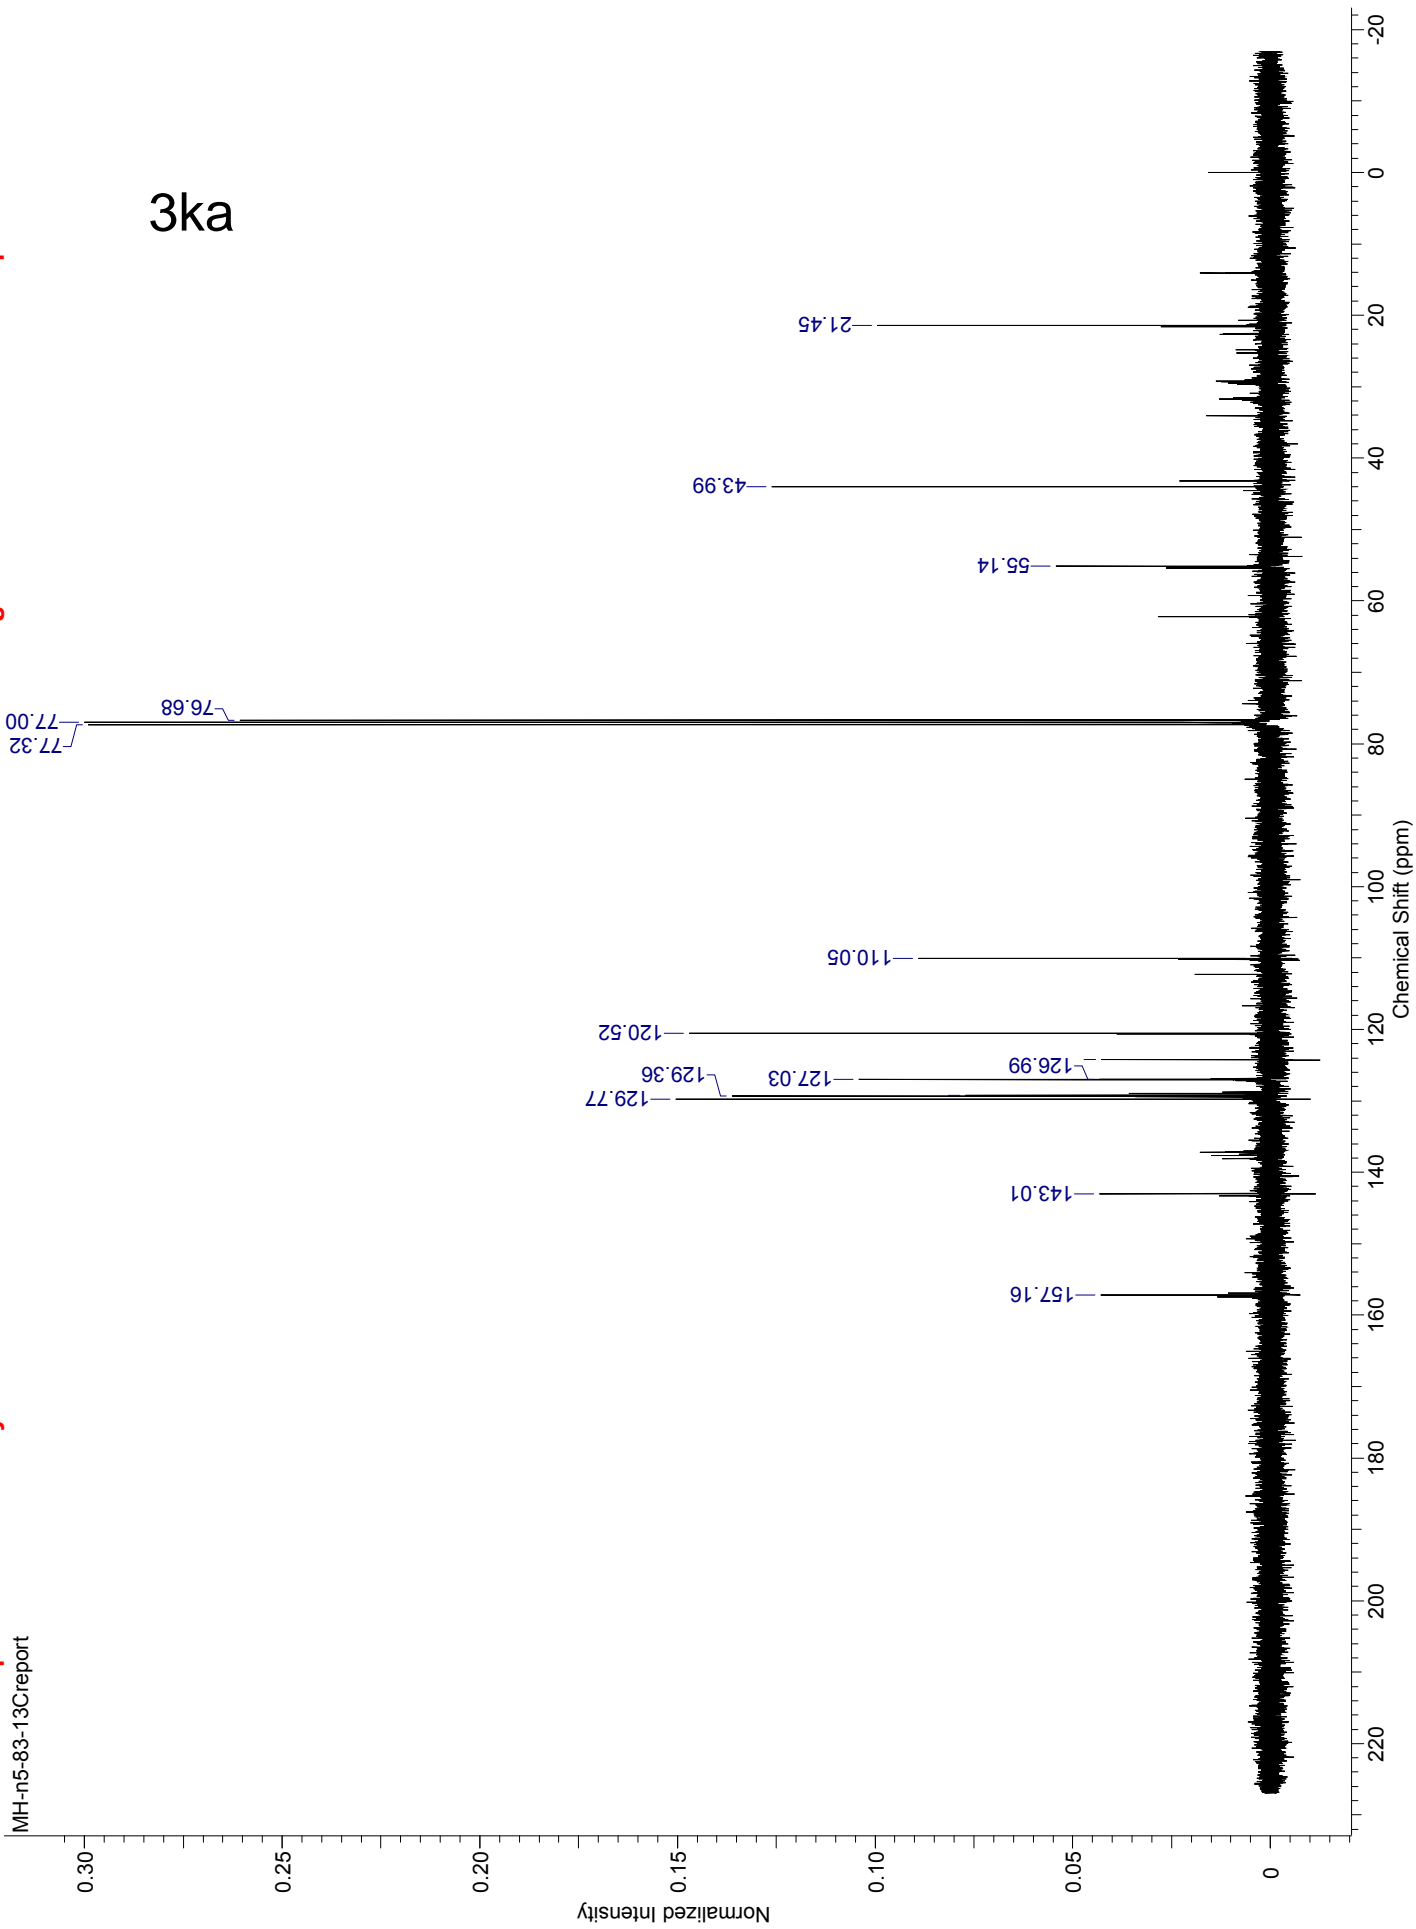

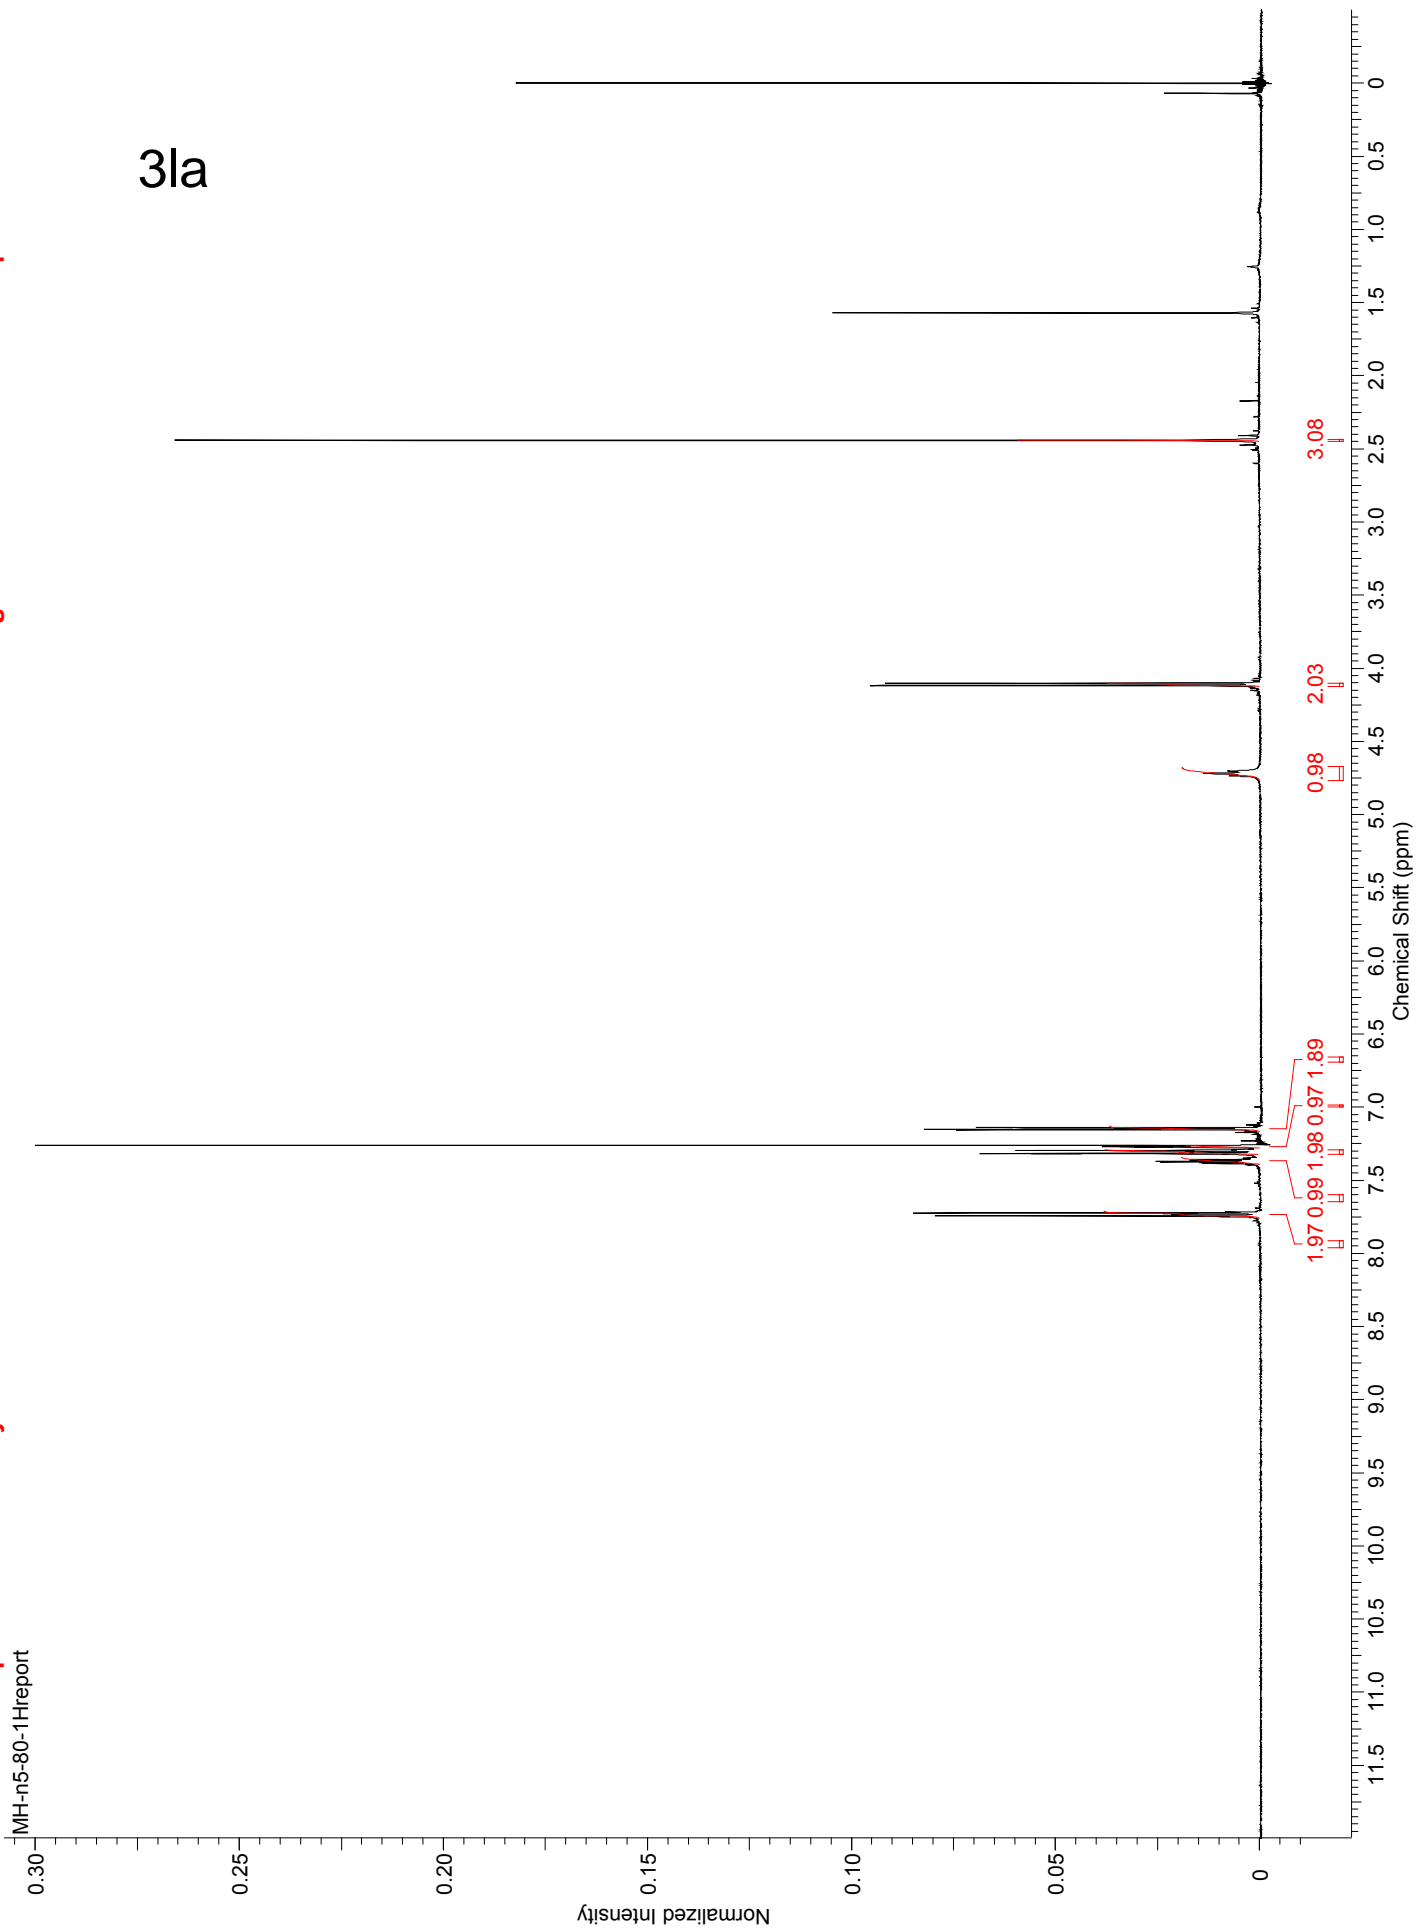

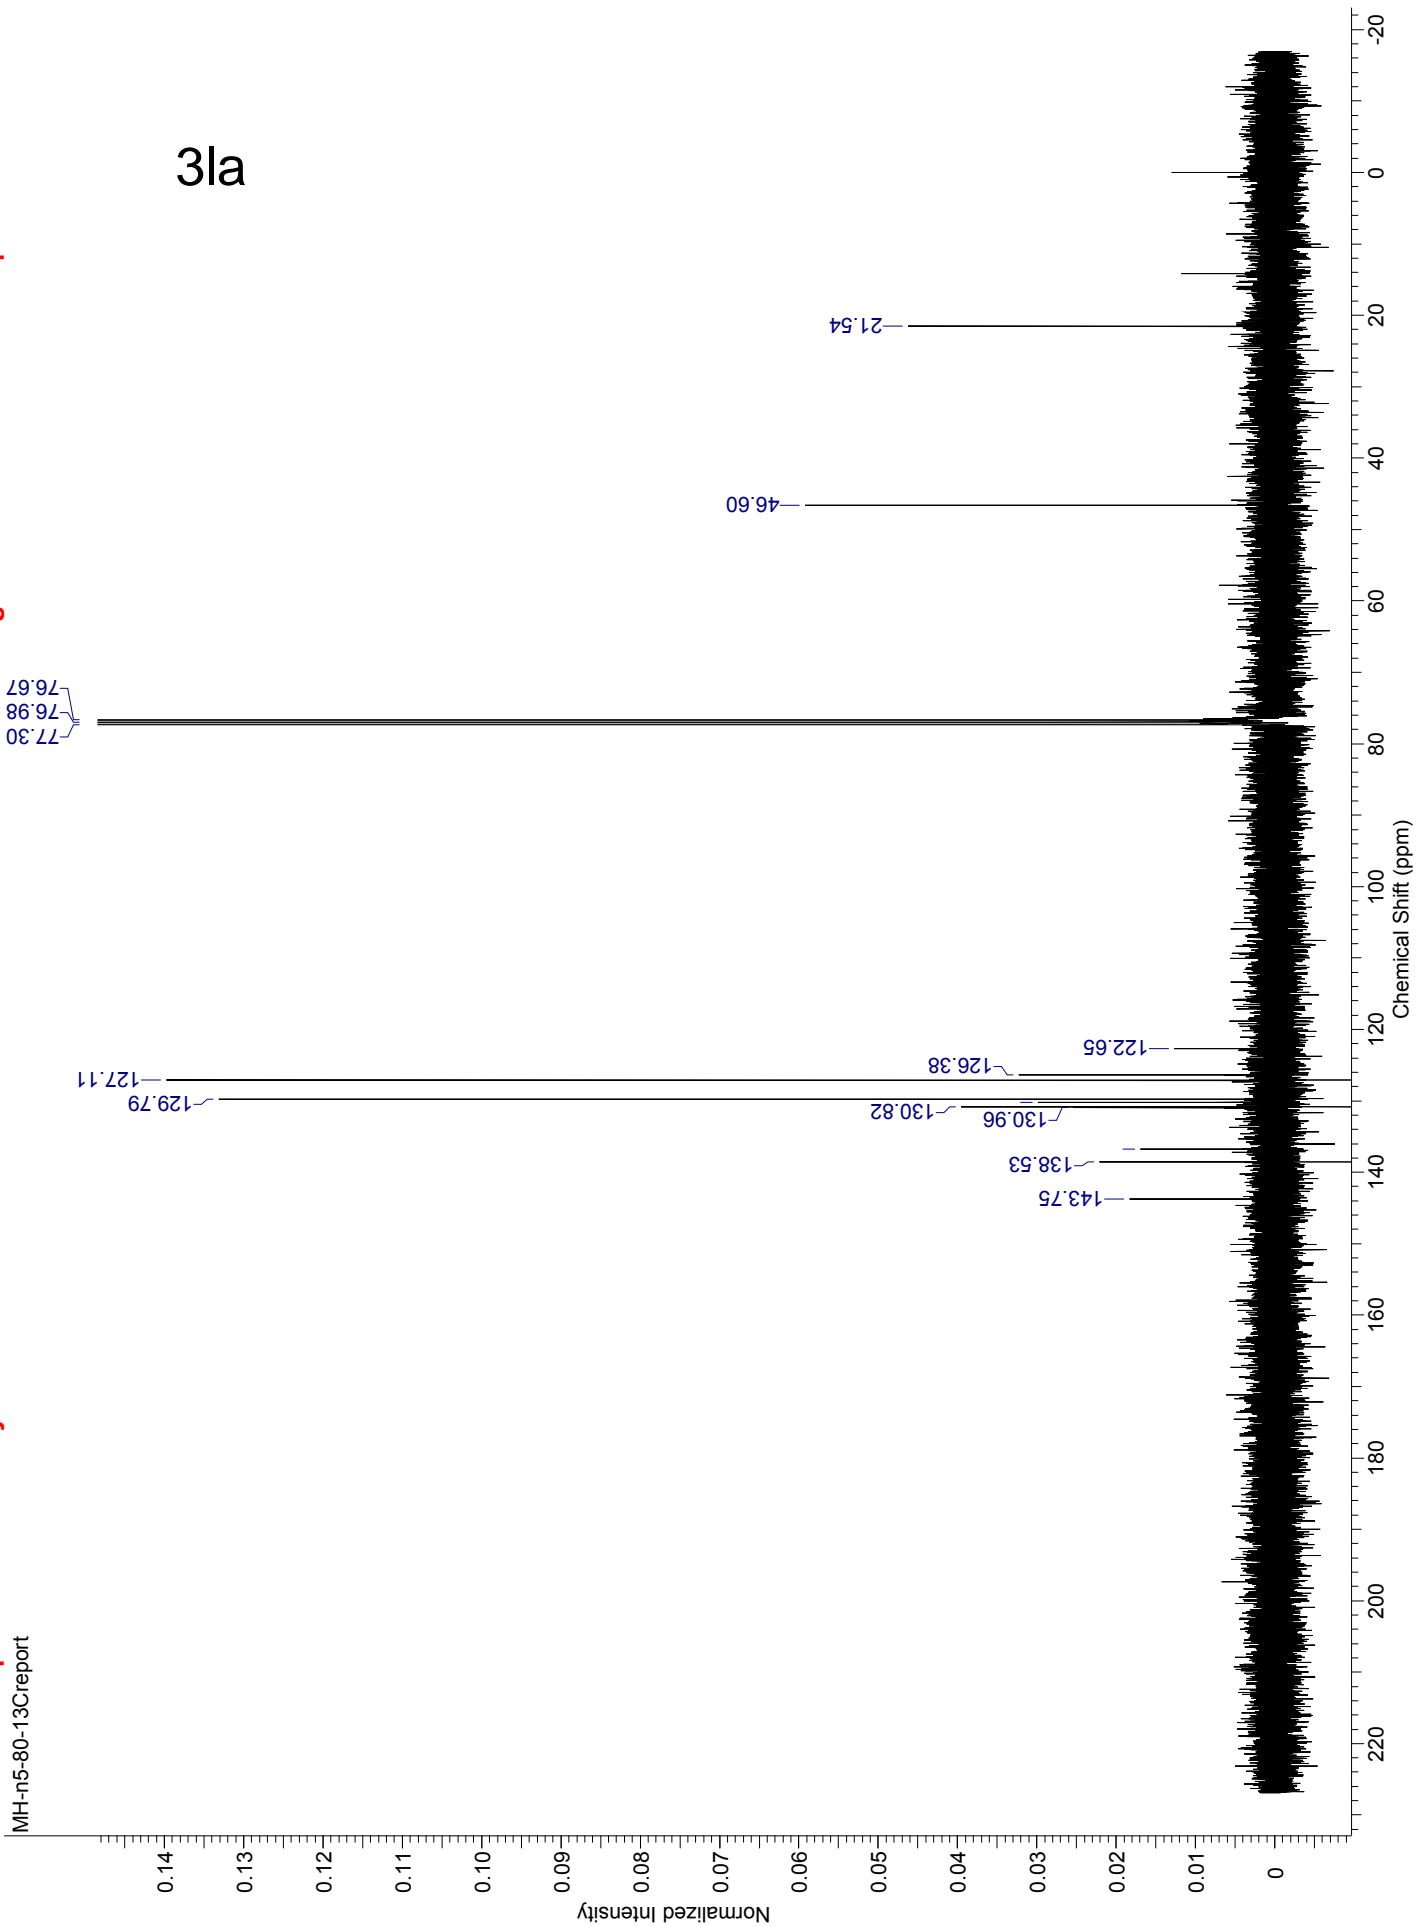

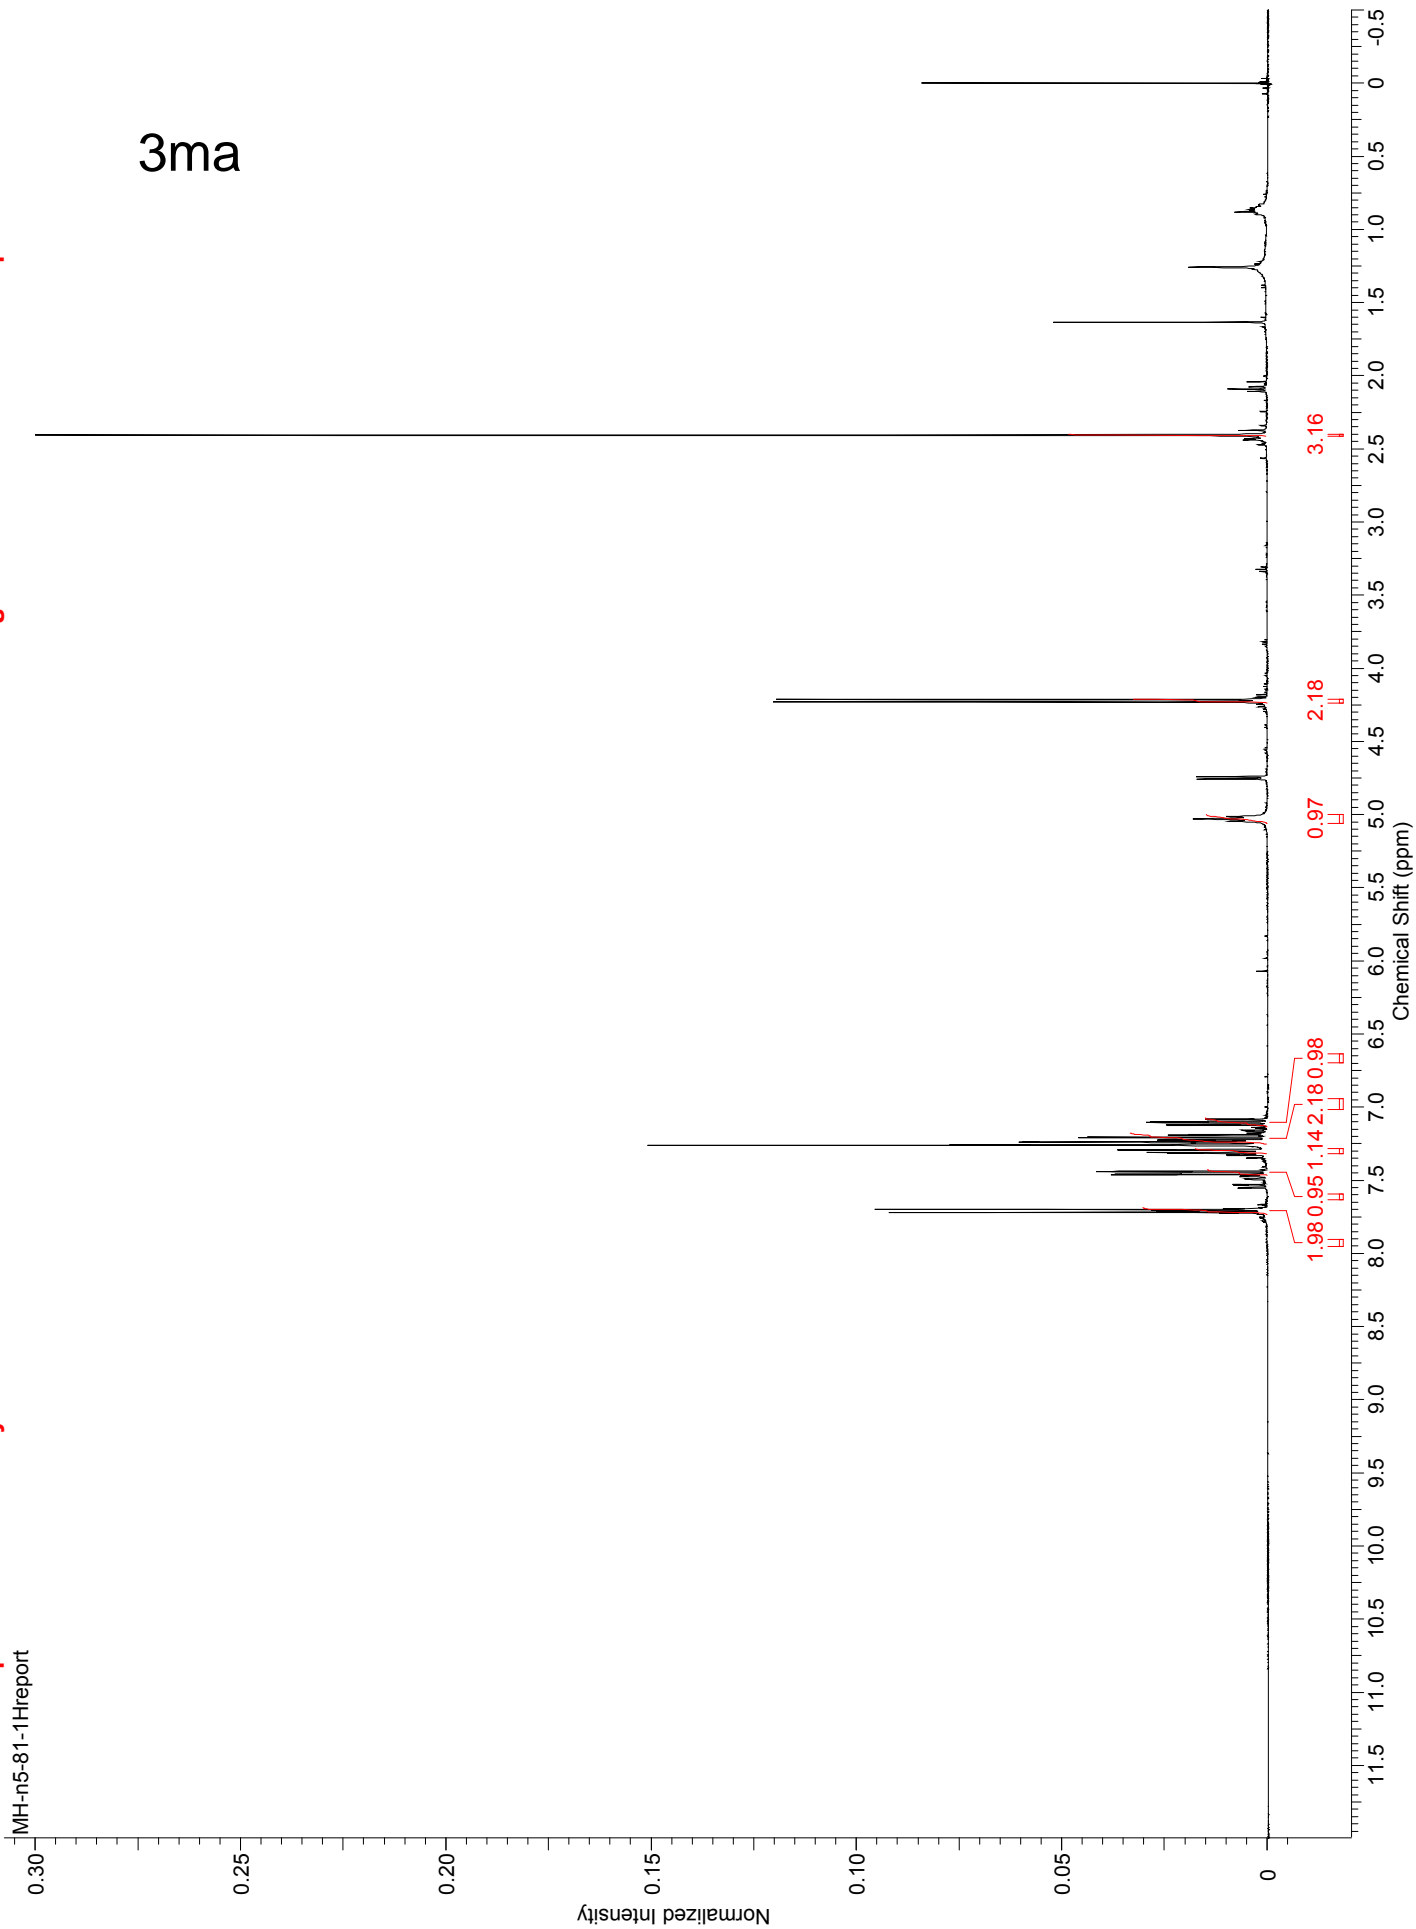



This report was created by ACD/NMR Processor Academic Edition. For more information go to [www.acdlabs.com/nmrproc/](http://www.acdlabs.com/nmrproc/)

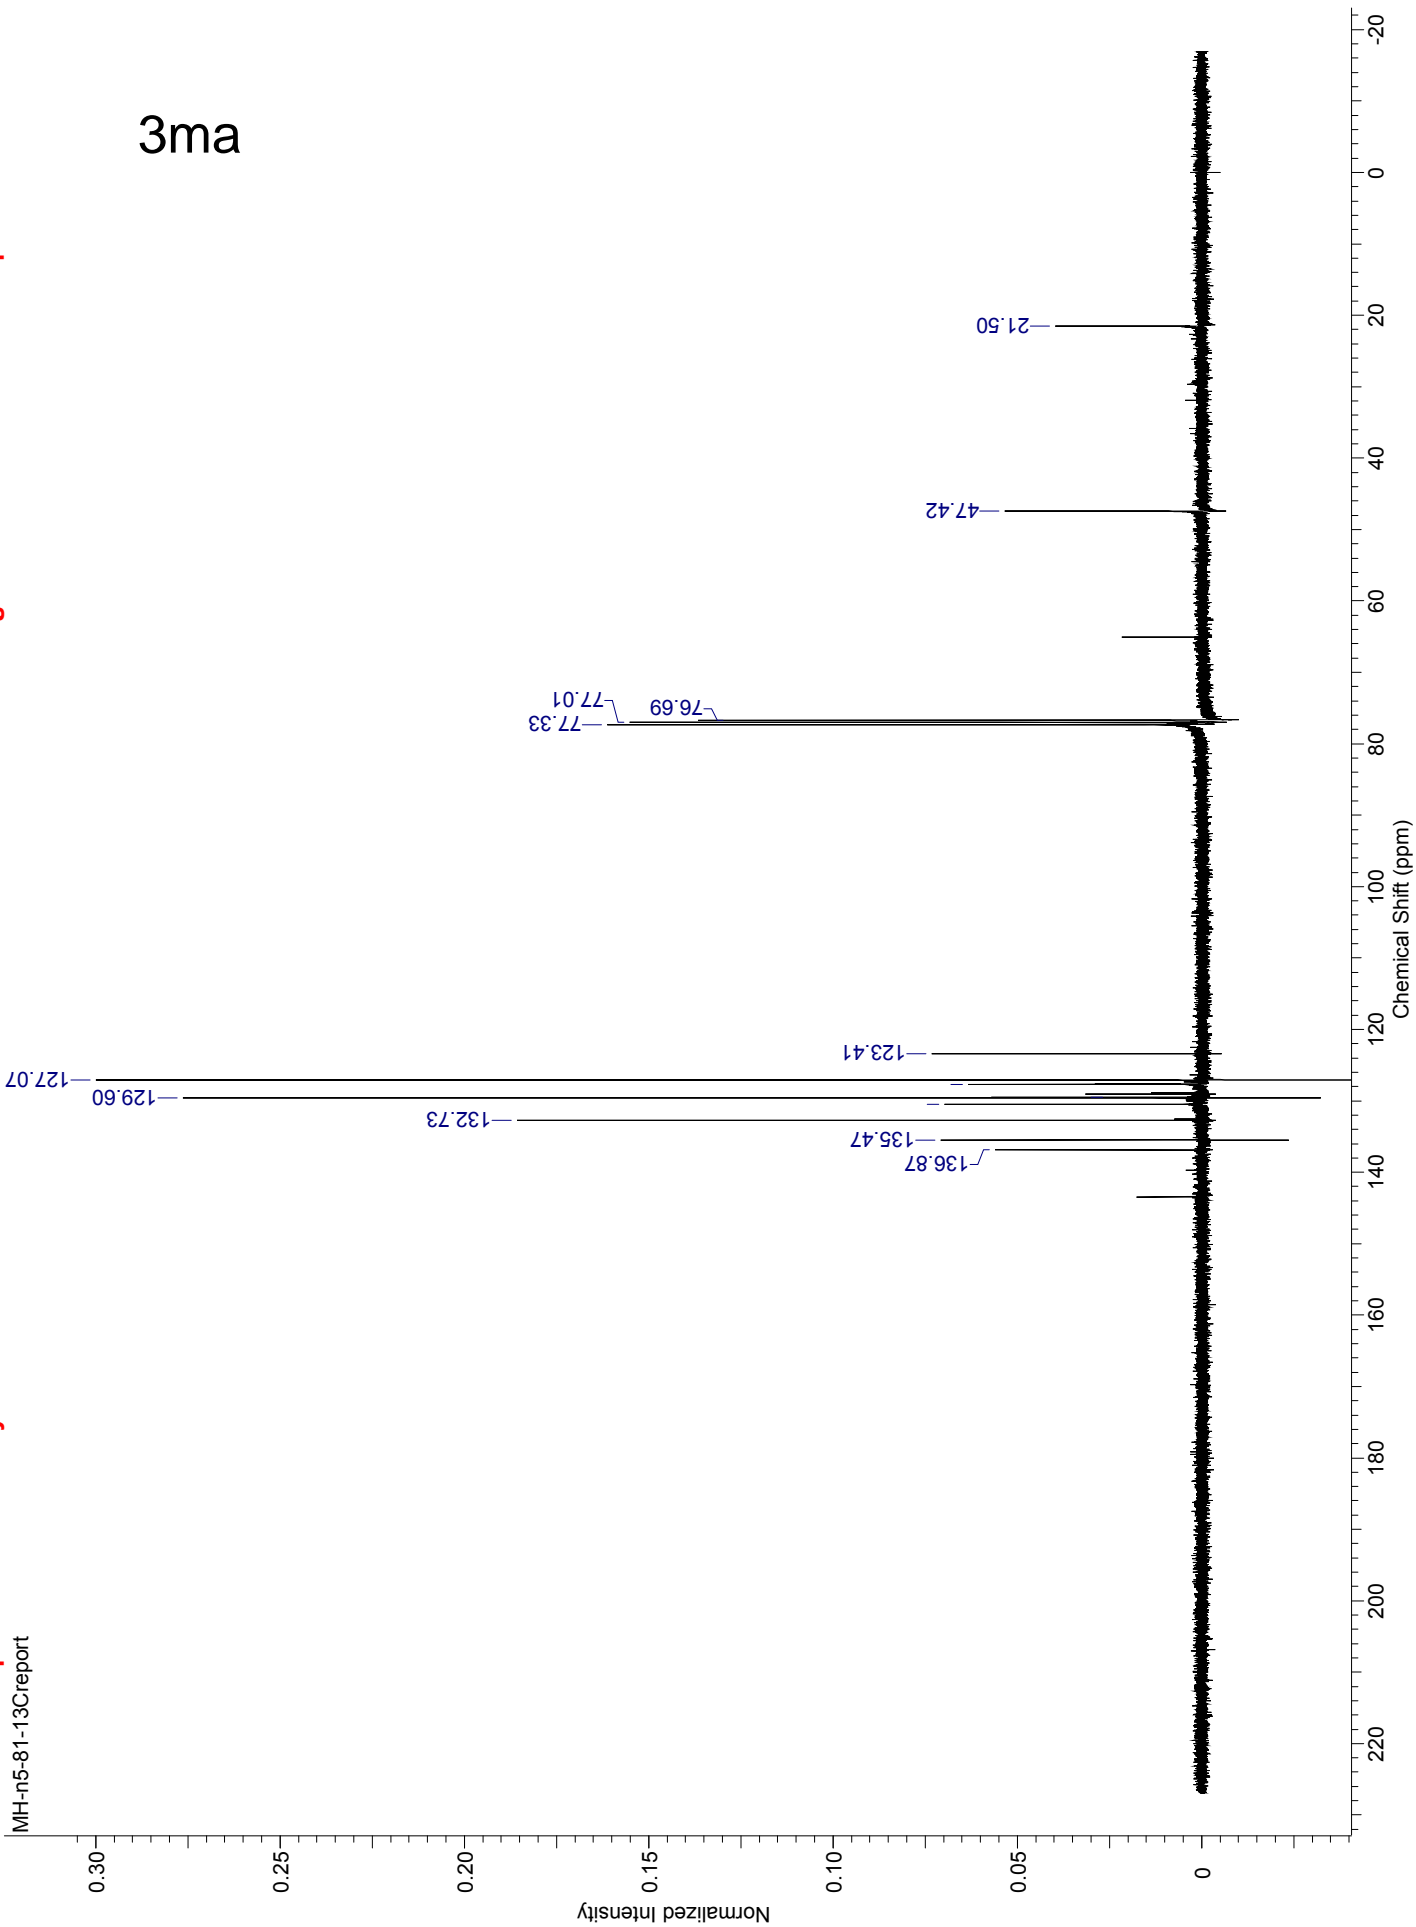

This report was created by ACD/NMR Processor Academic Edition. For more information go to [www.acdlabs.com/nmrproc/](http://www.acdlabs.com/nmrproc/)

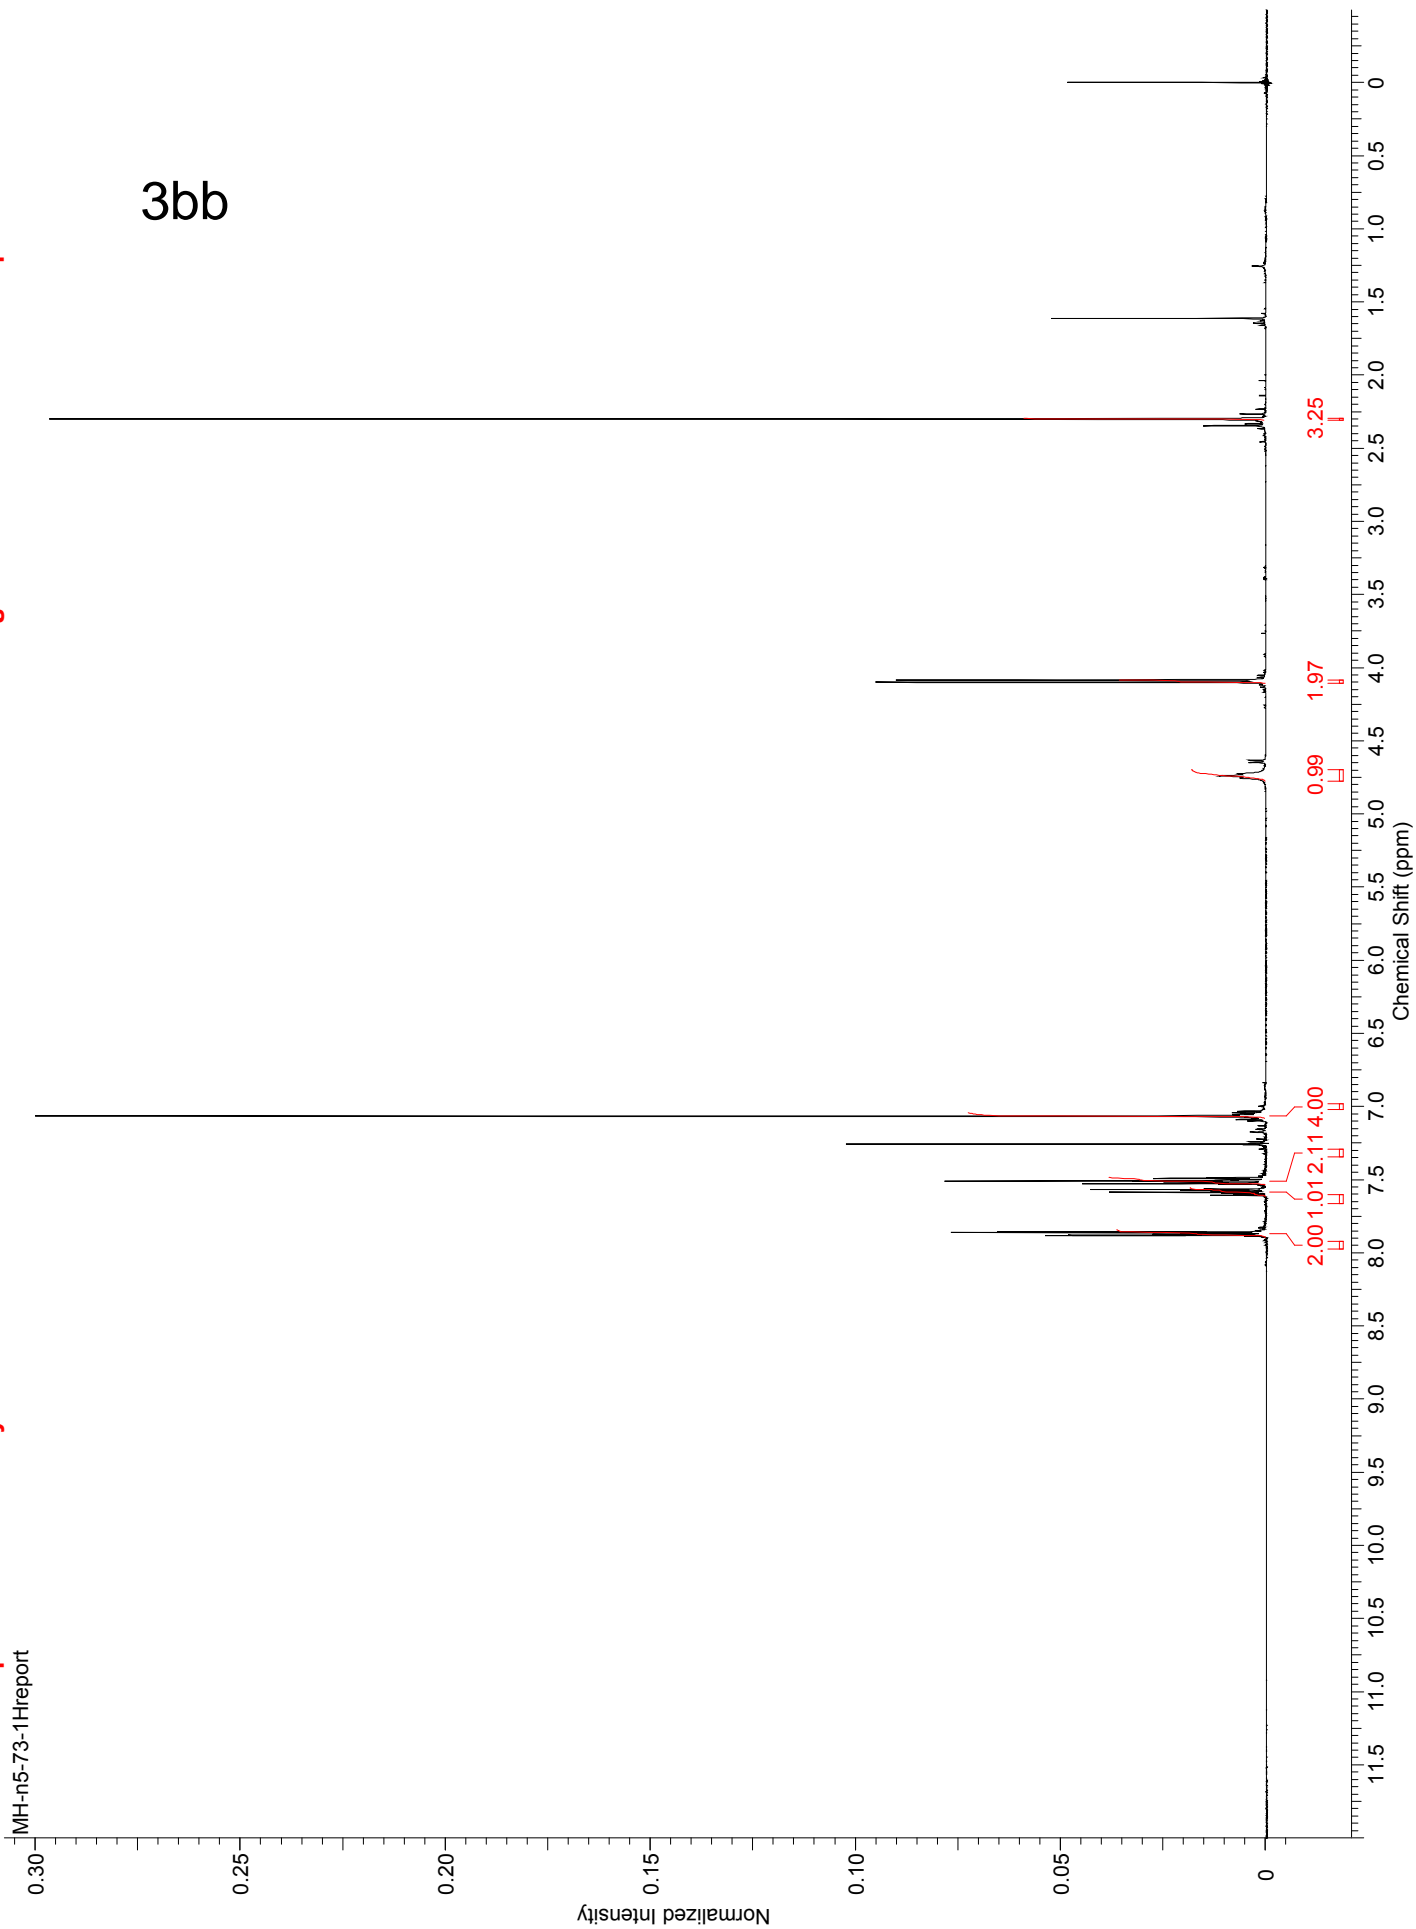

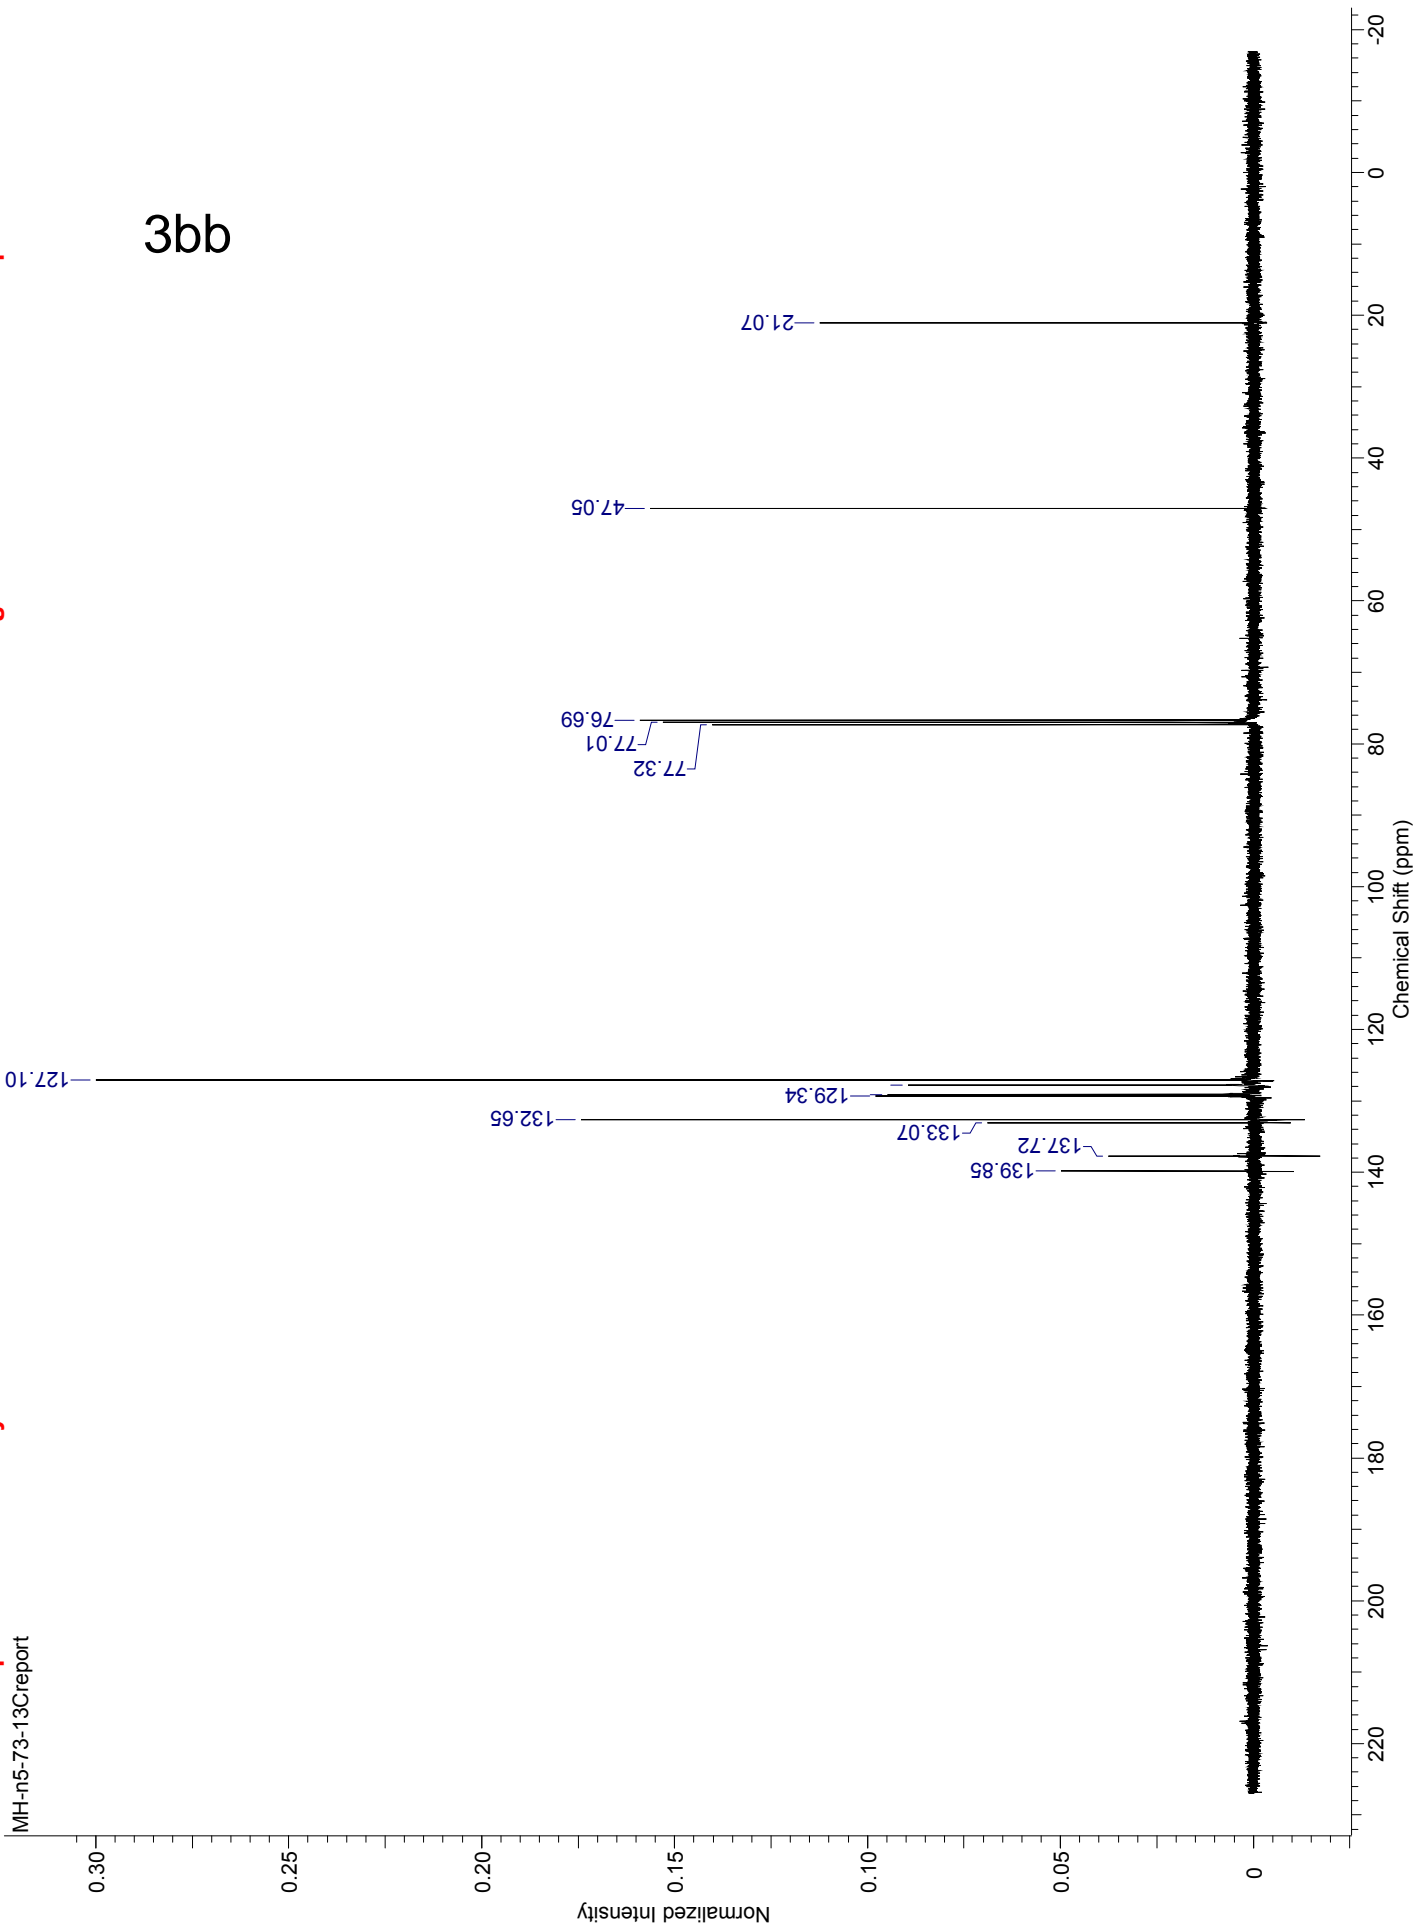

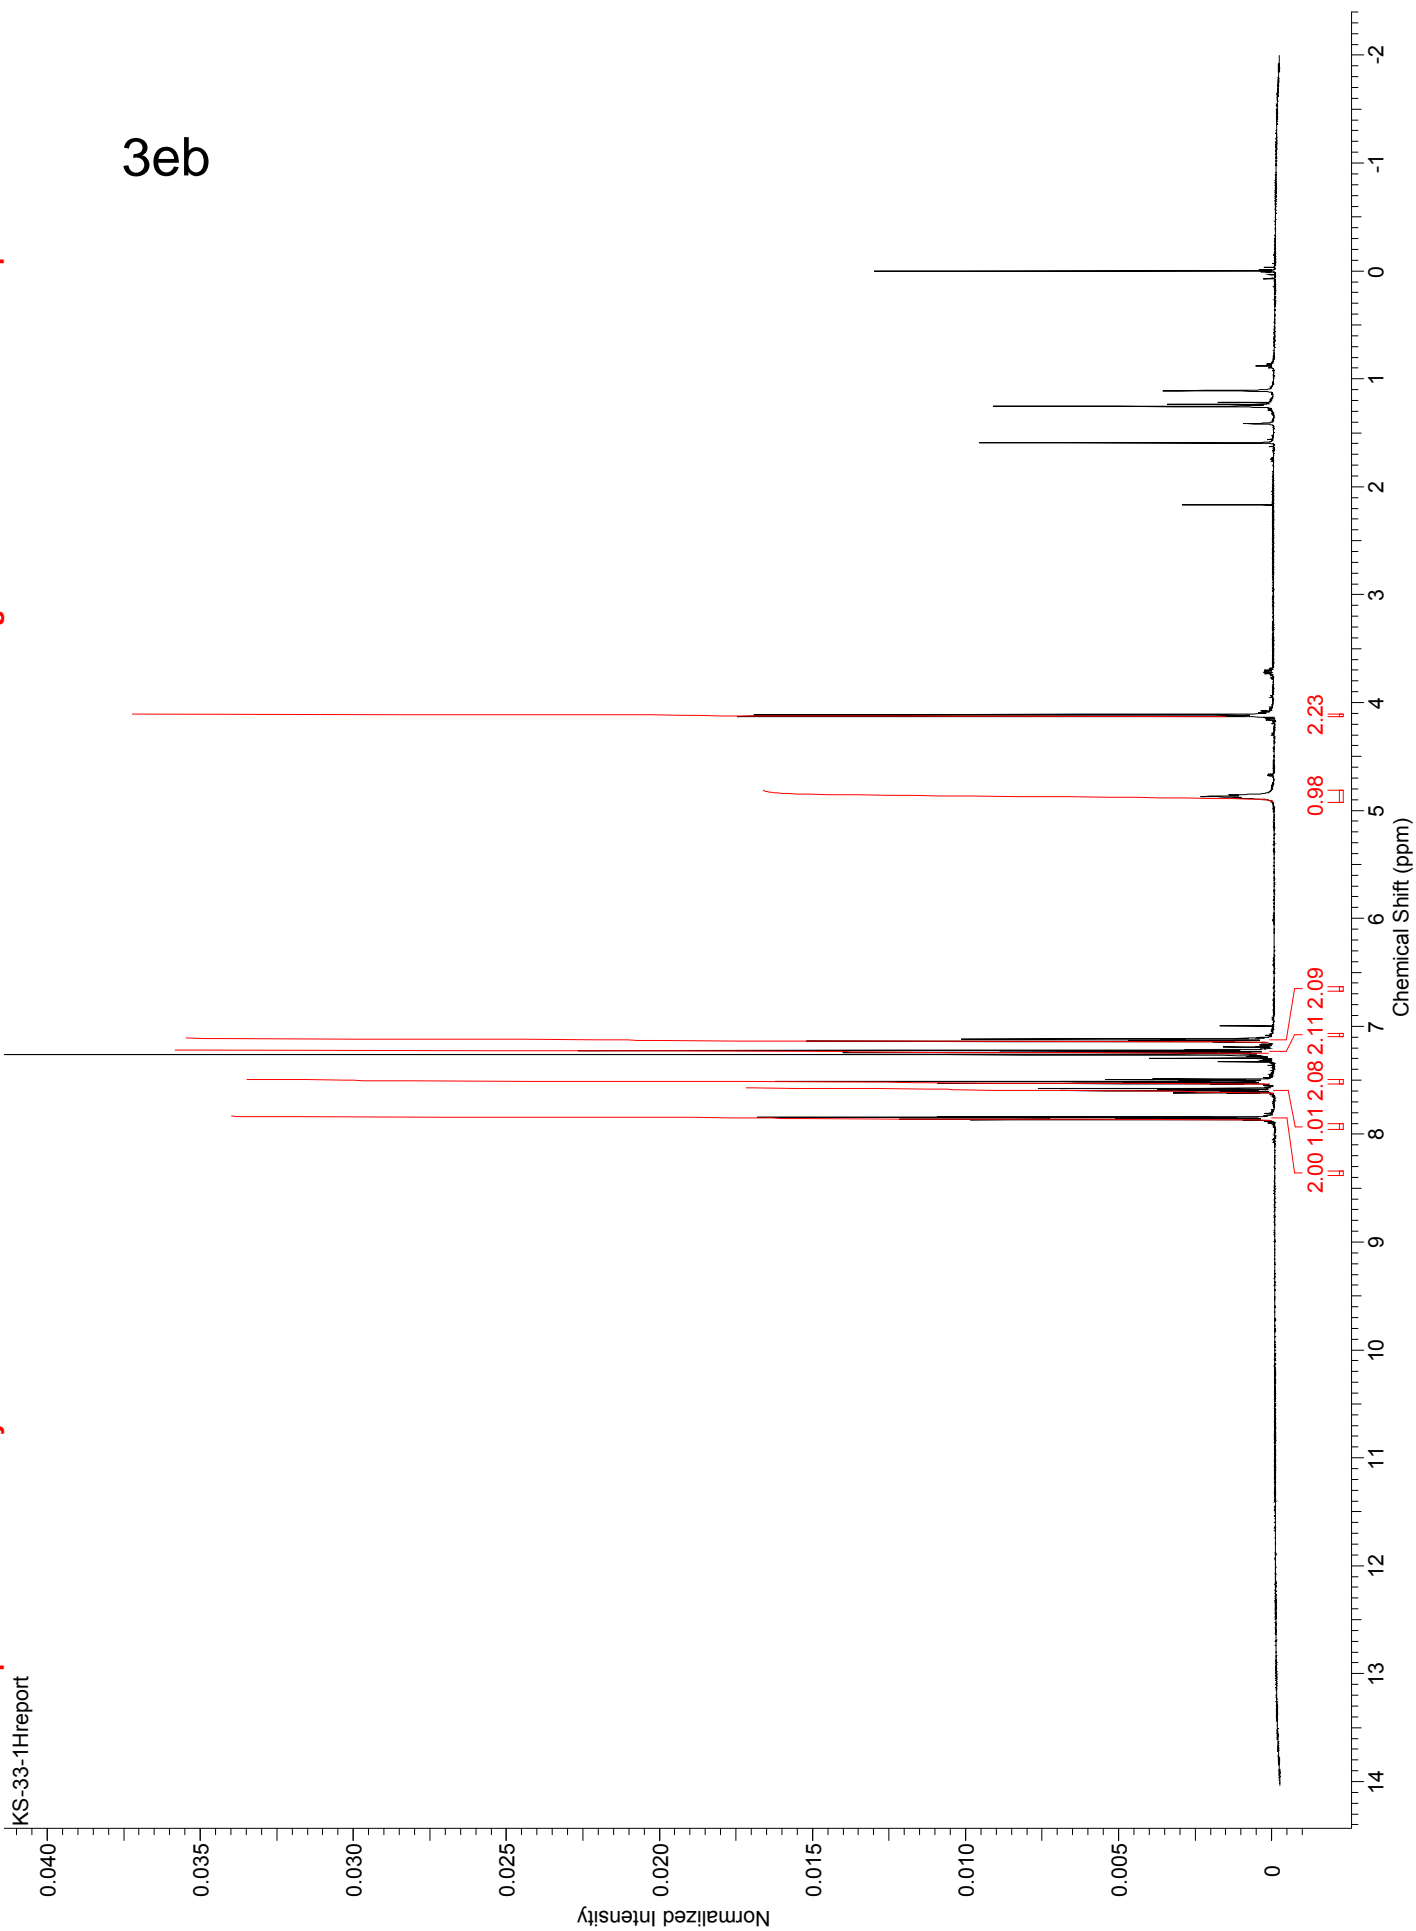

KS-33-13Creport

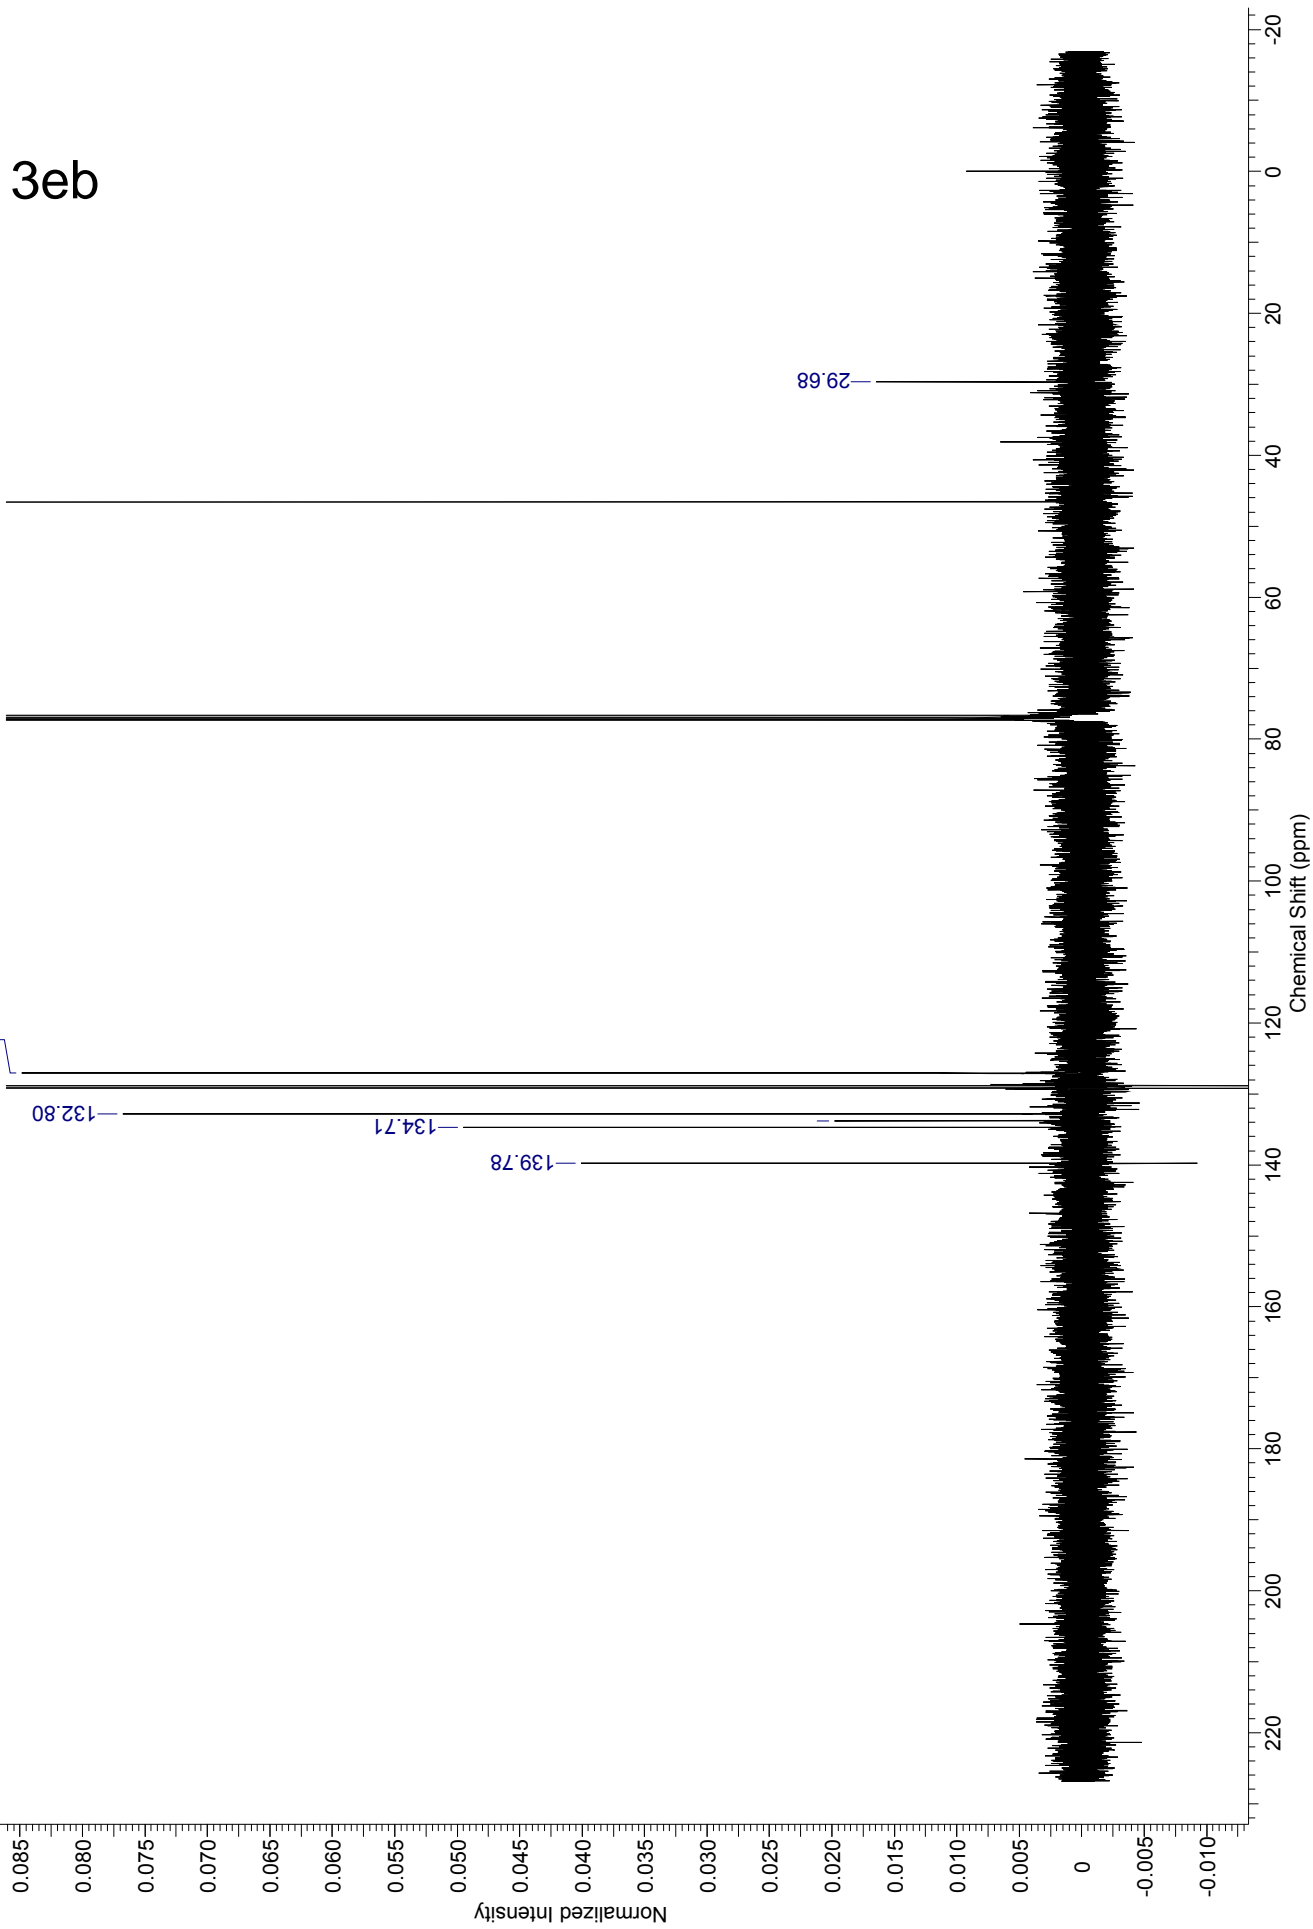

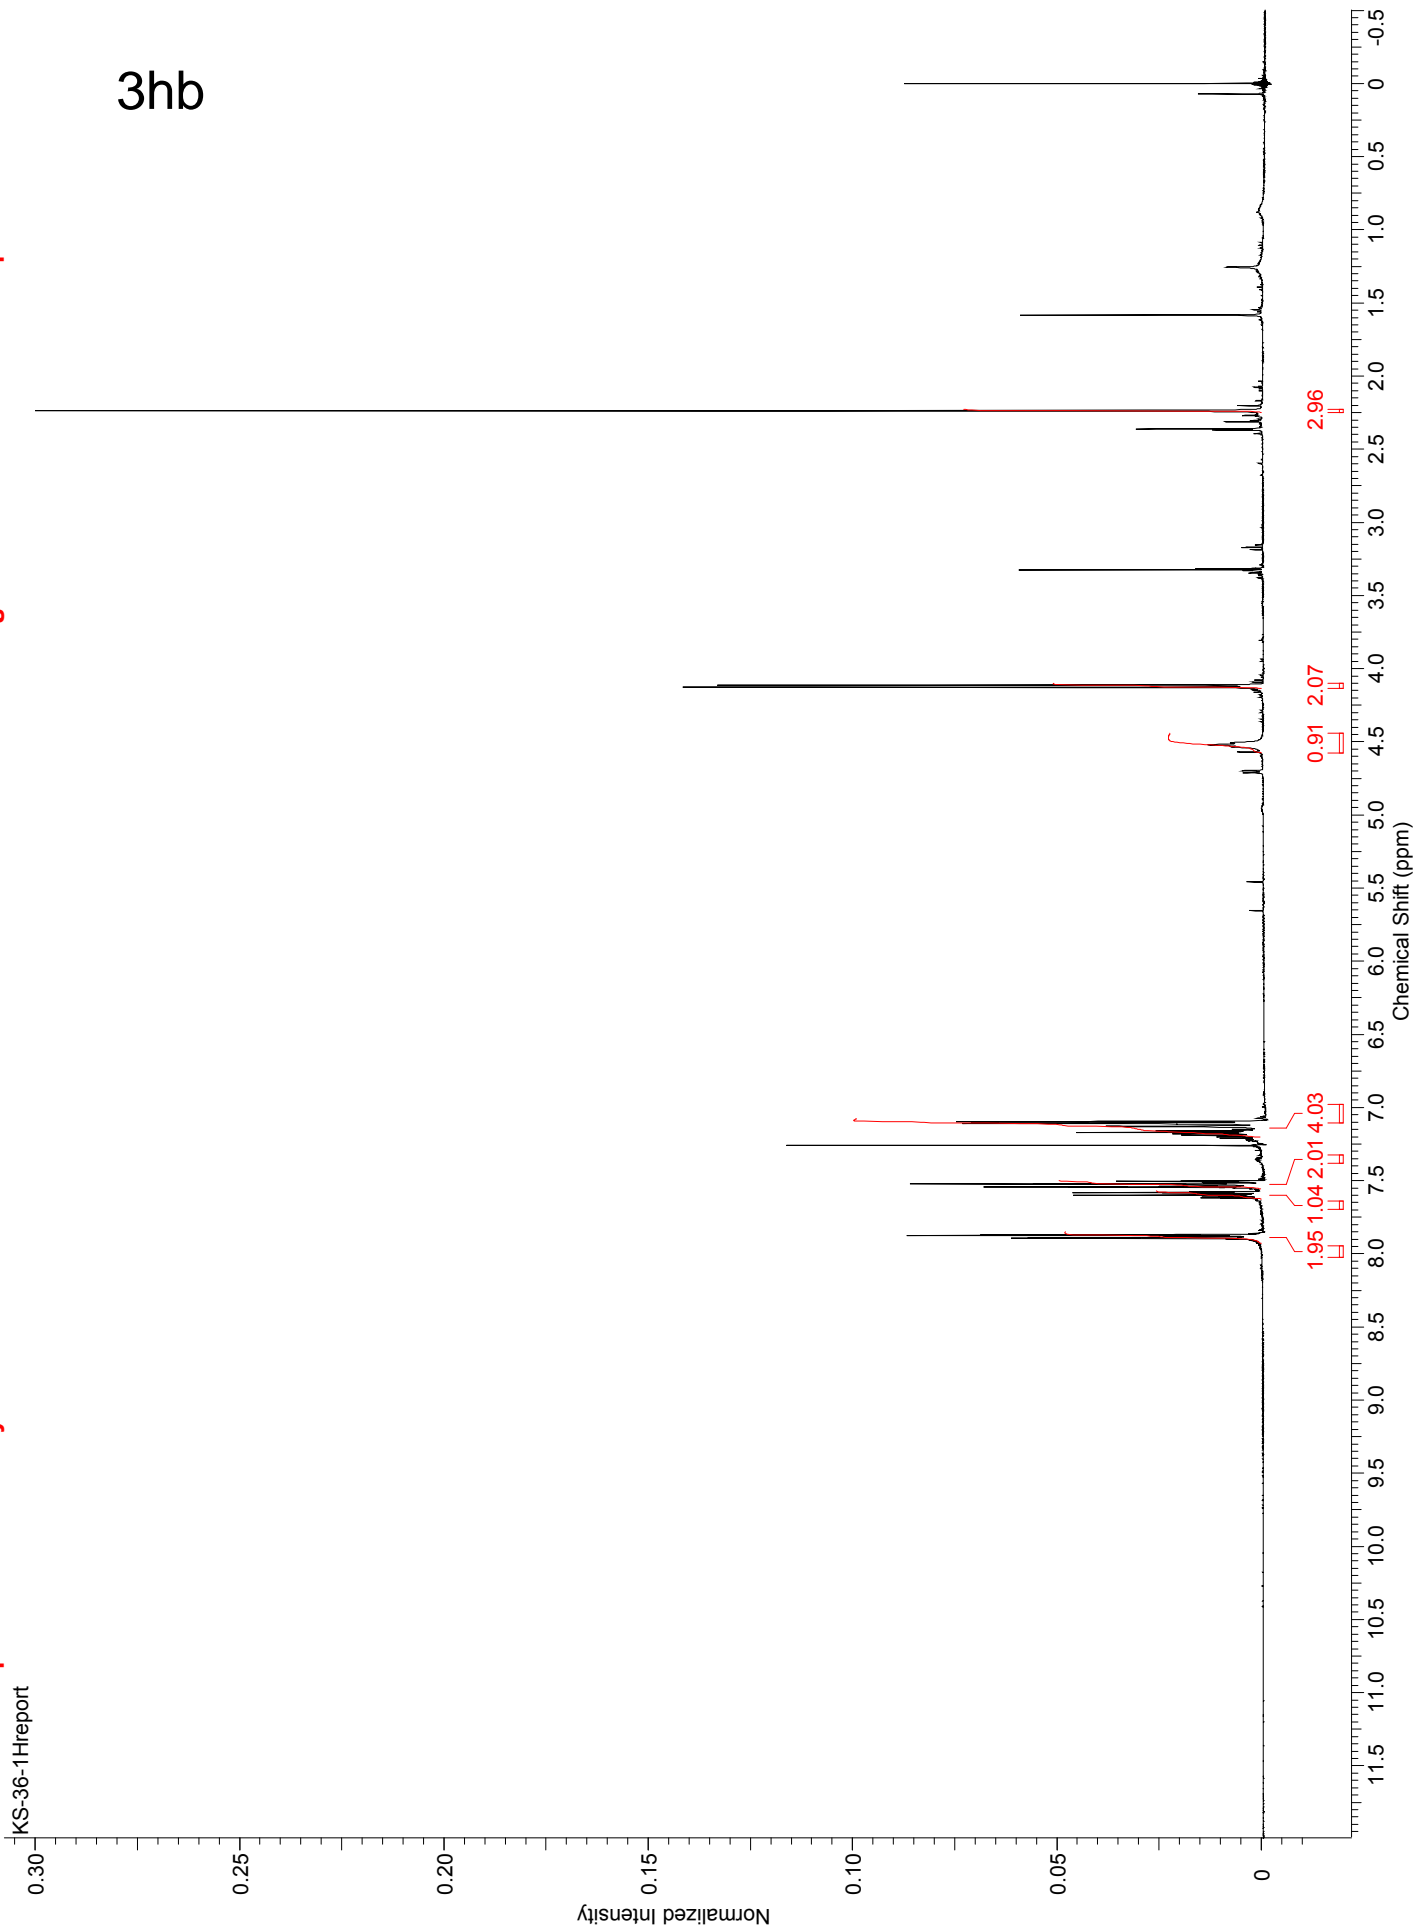

KS-36-13Creport

3hb

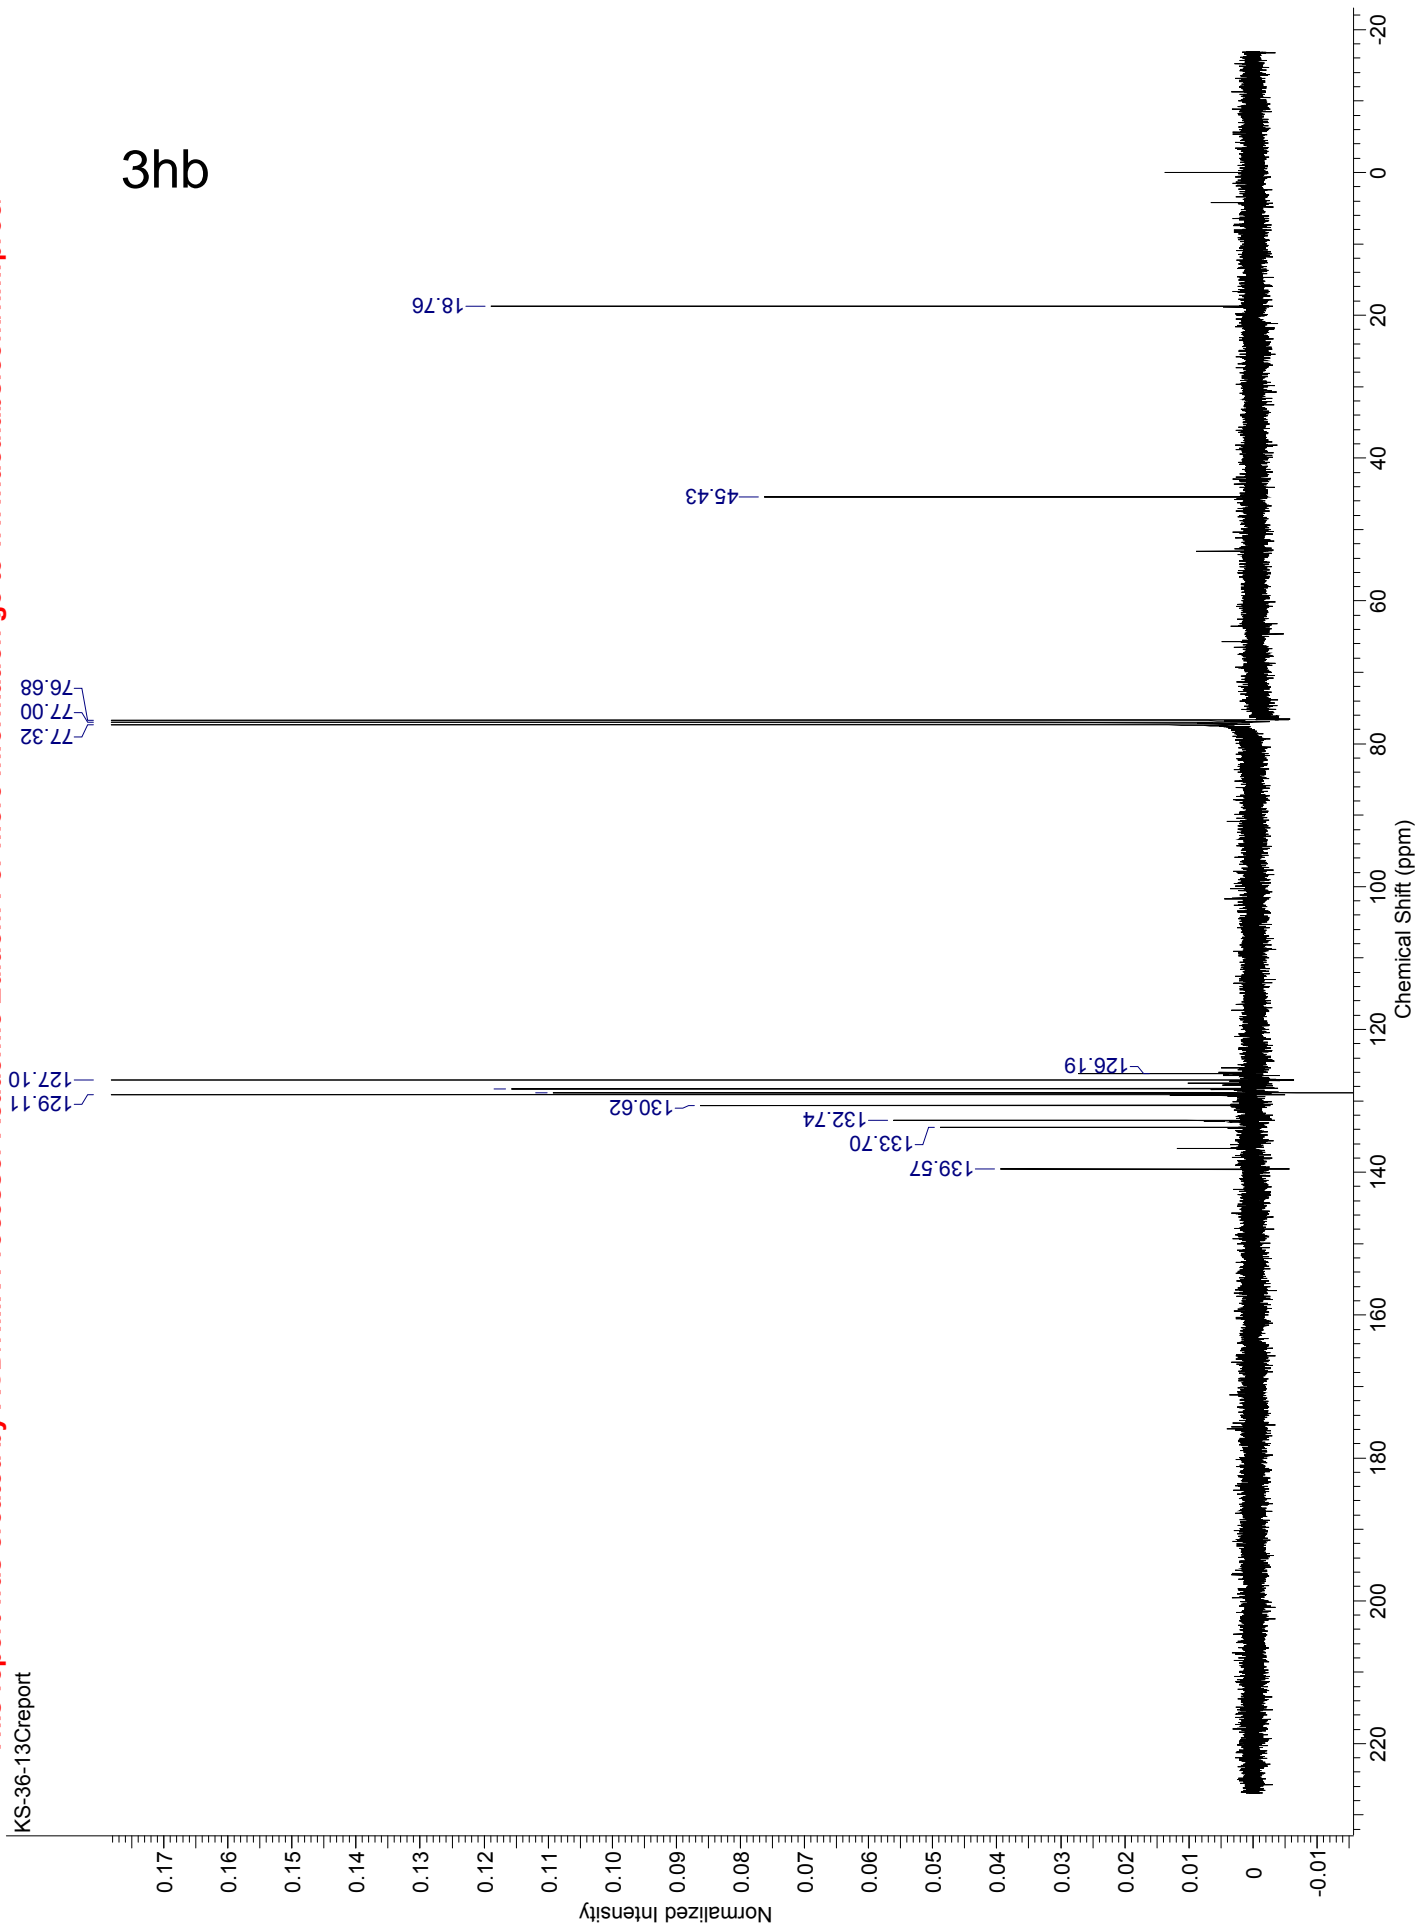

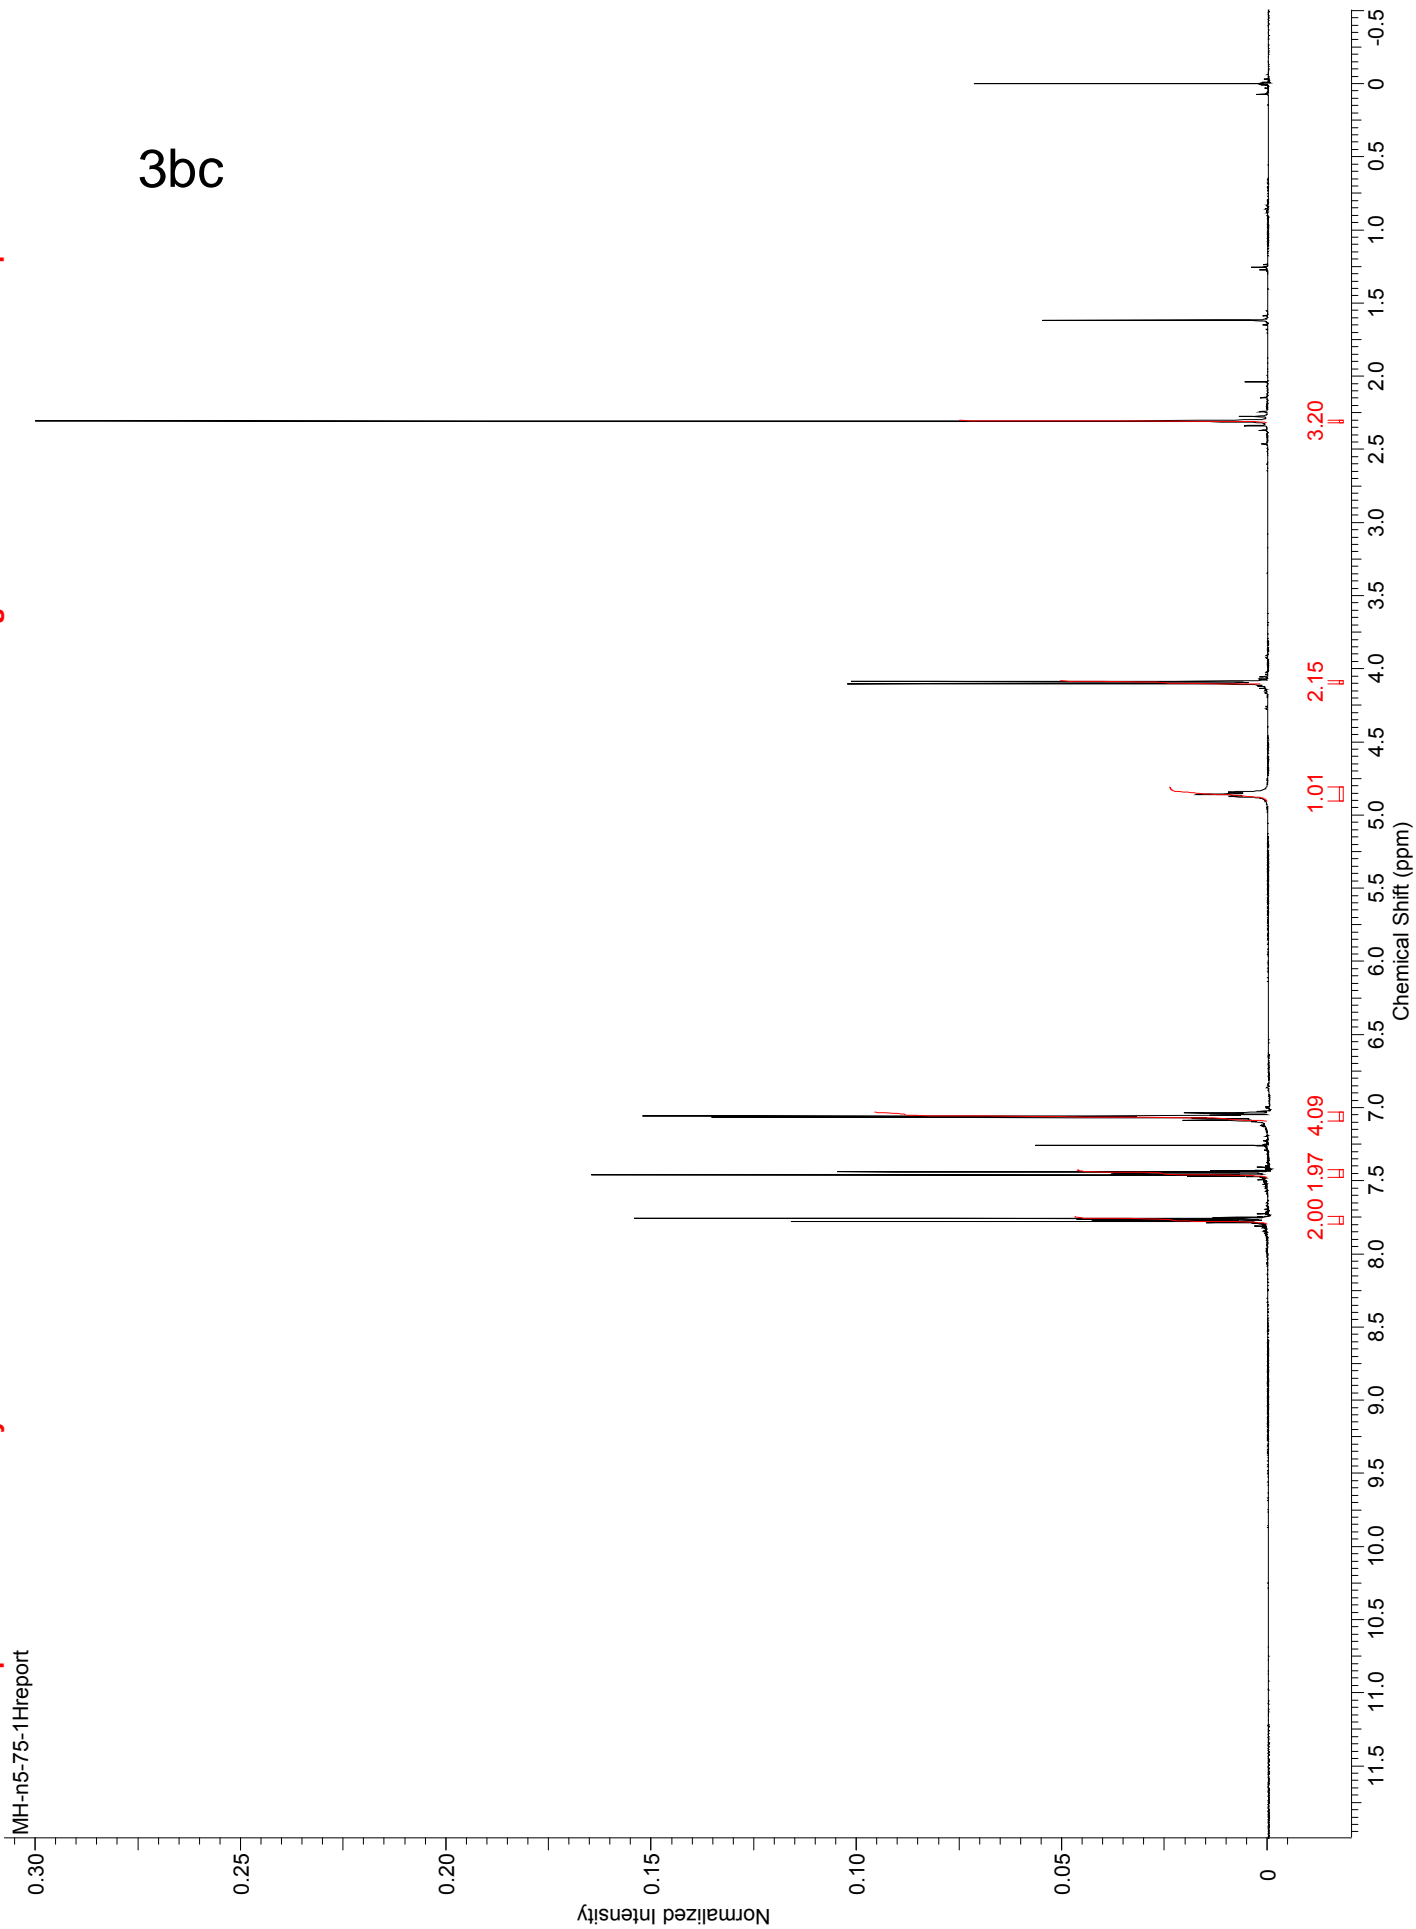



MH-n5-75-13Creport

3bc

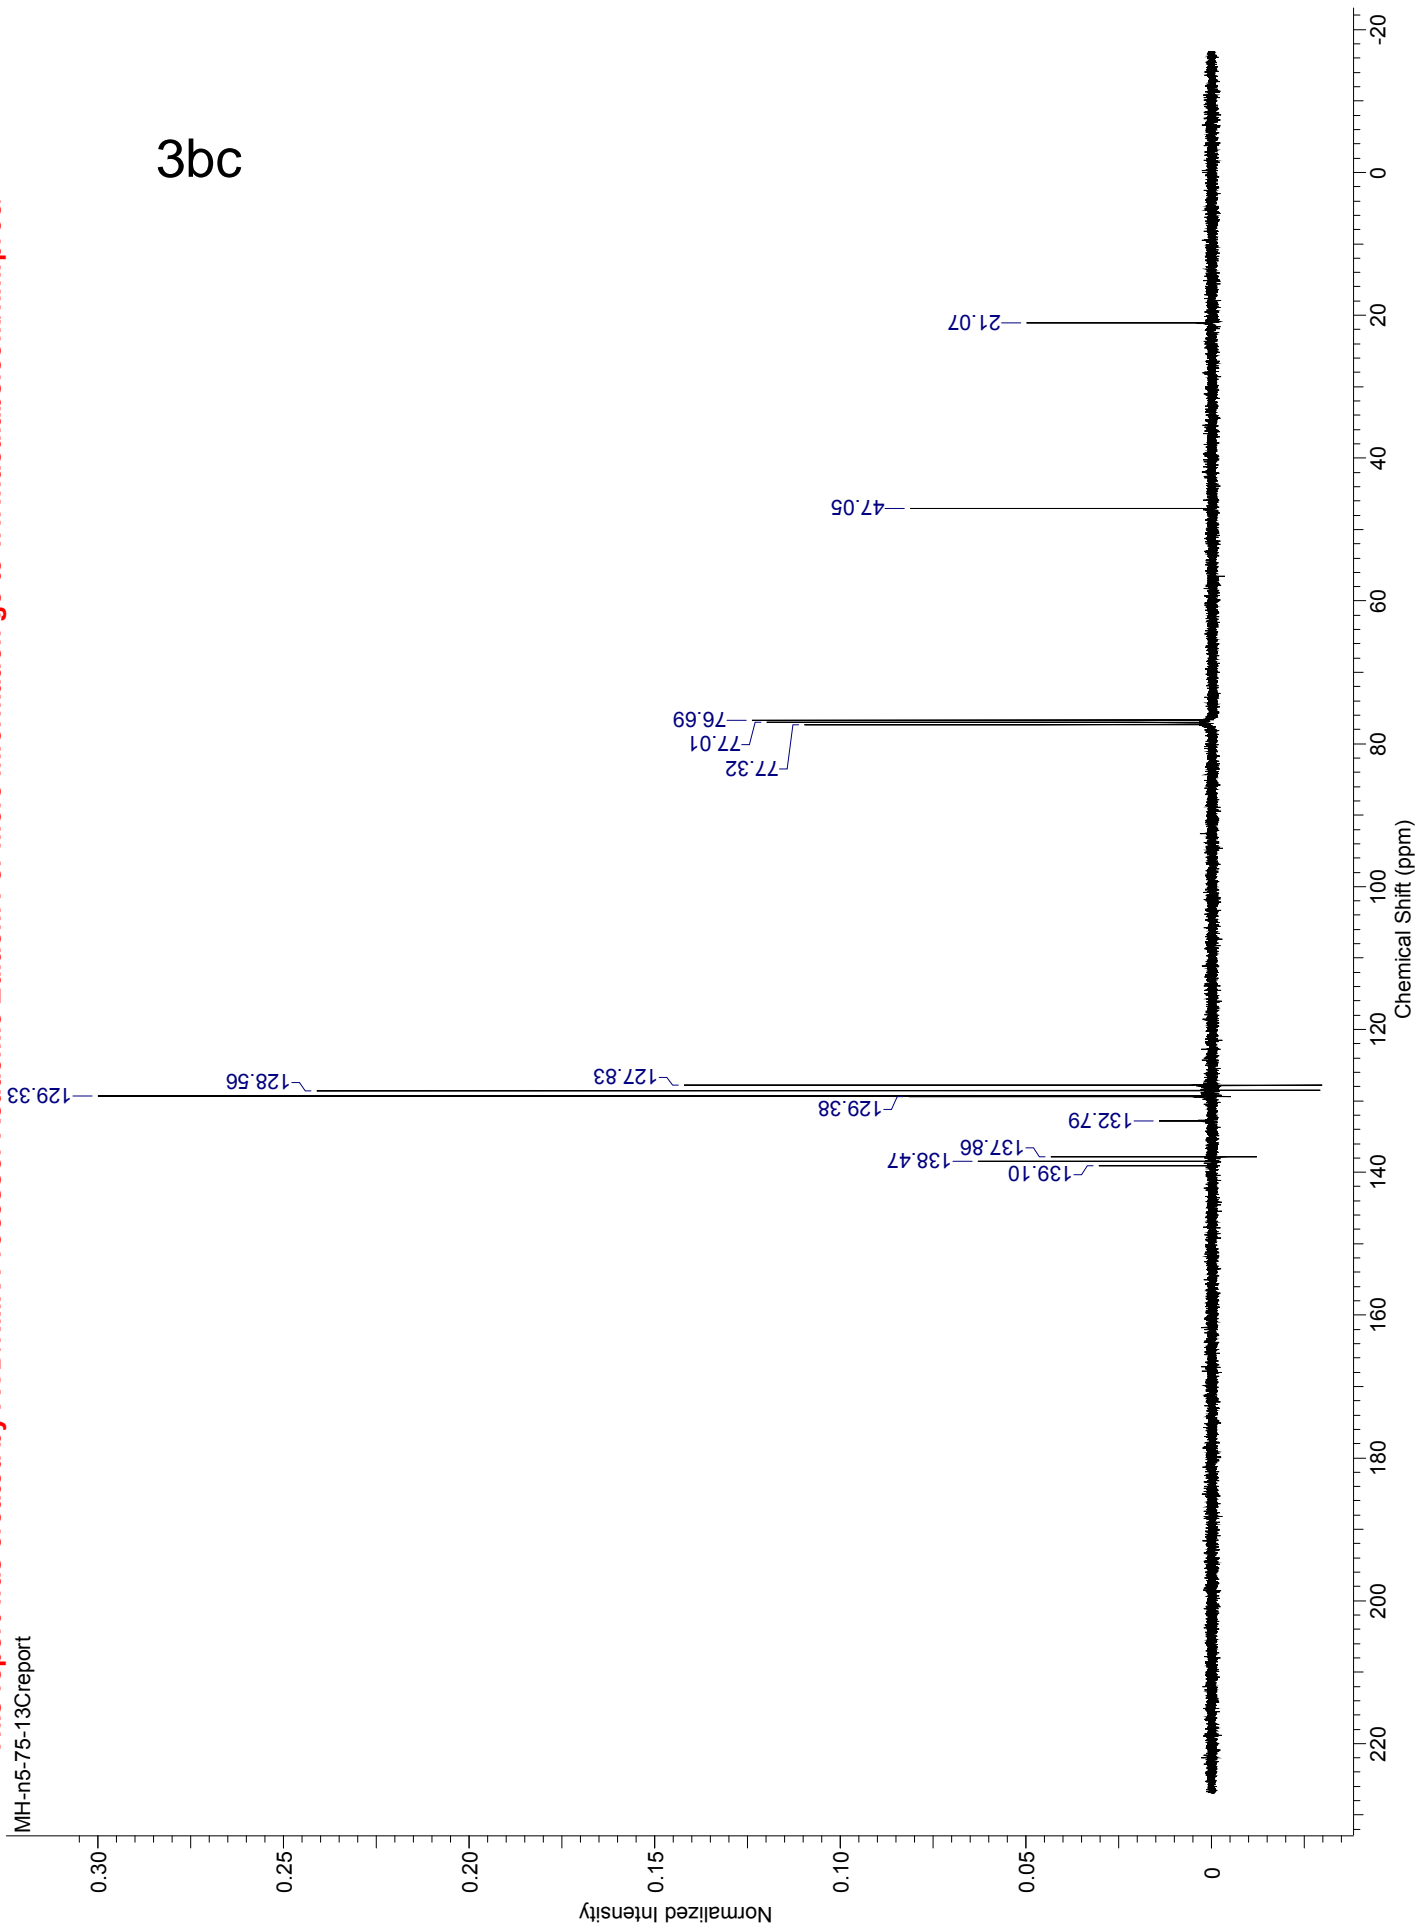

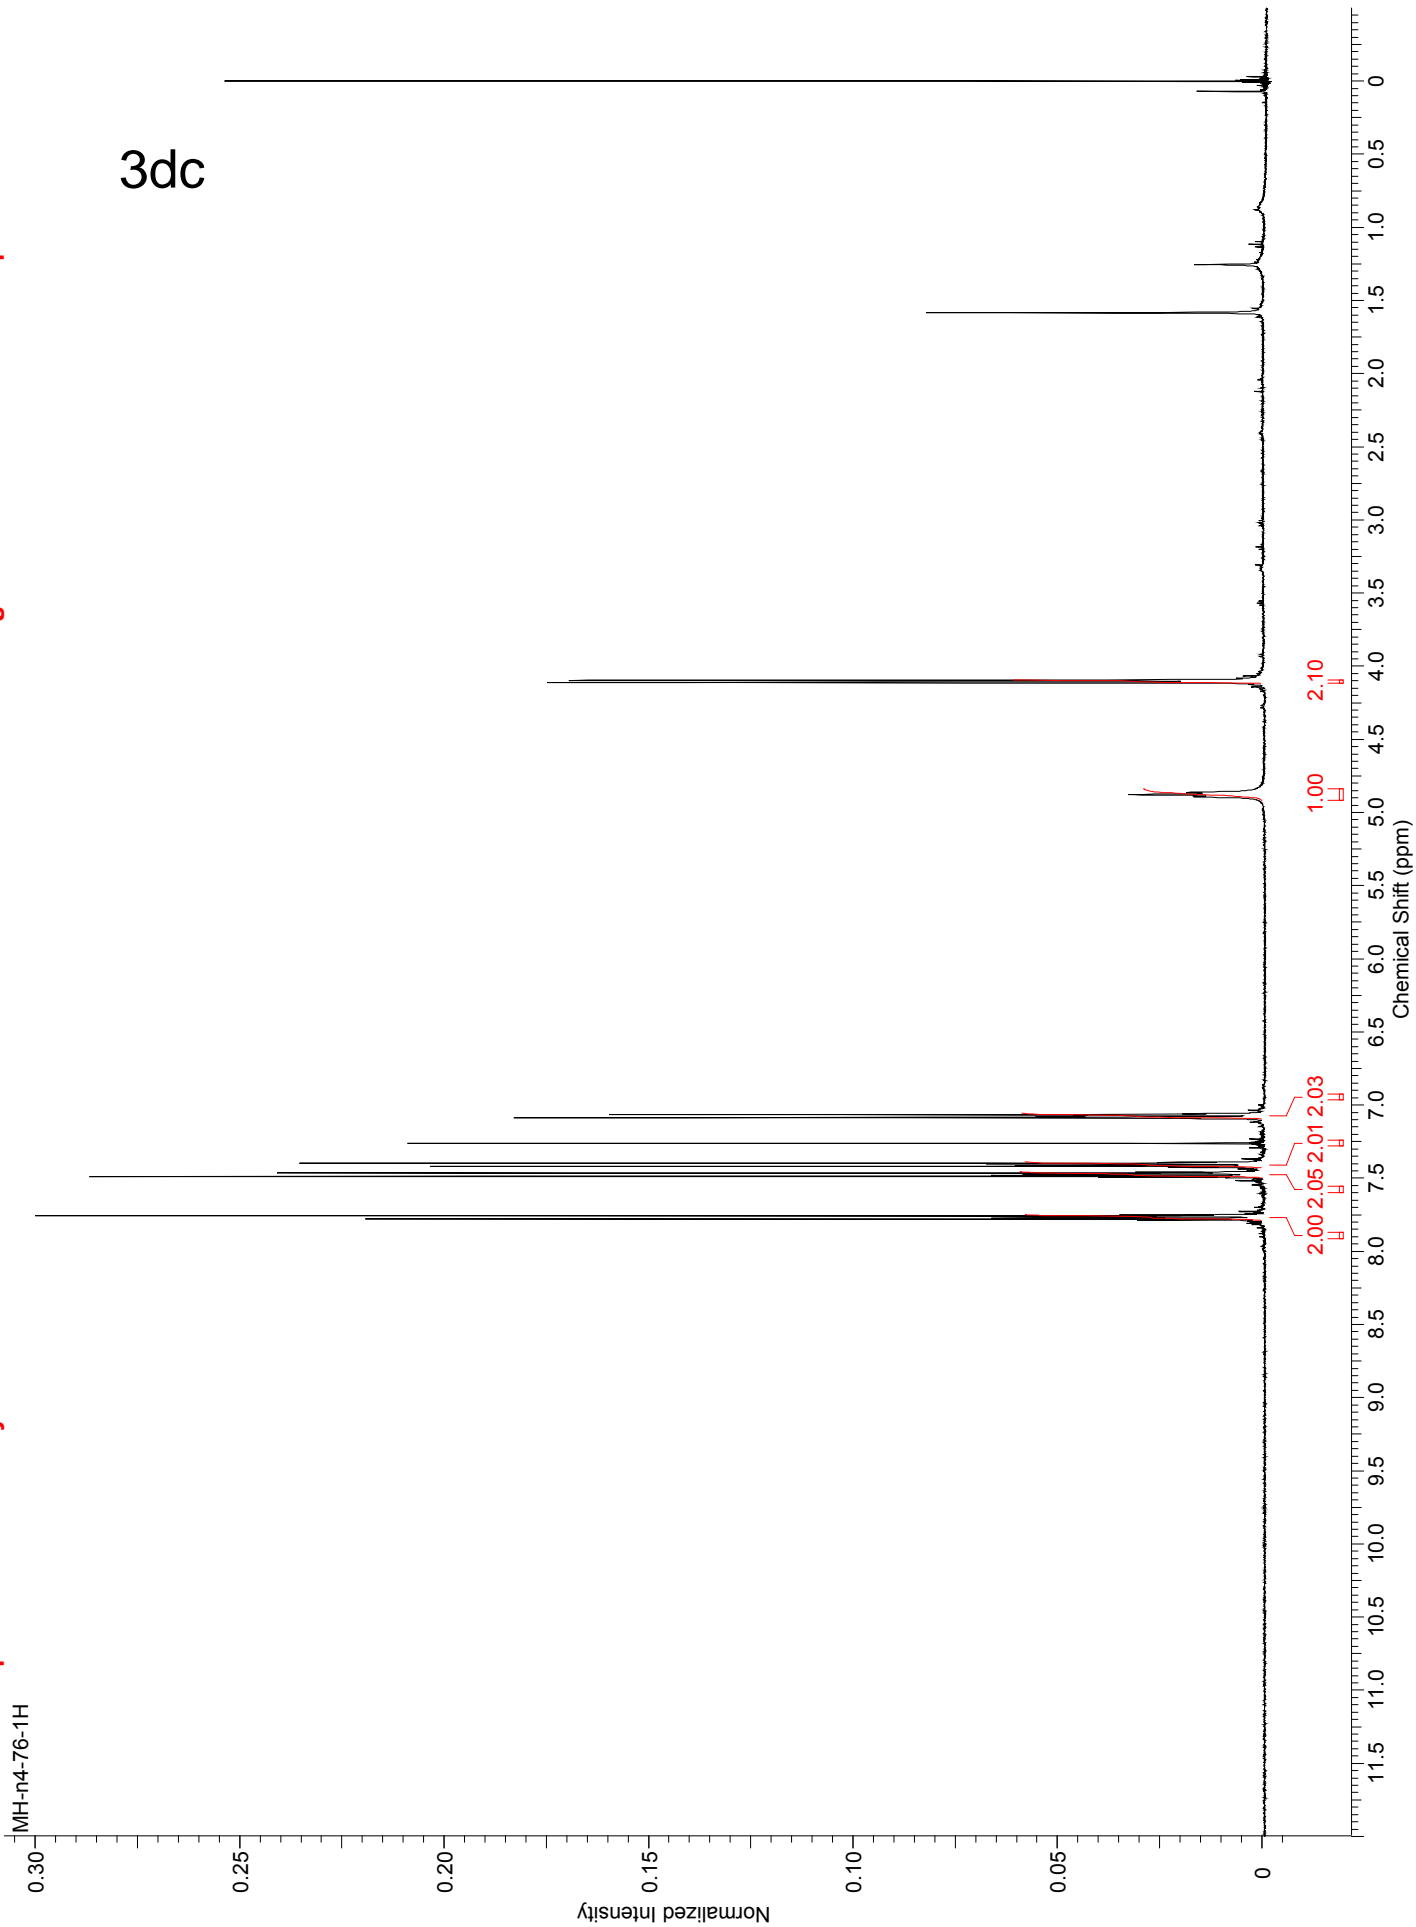

MH-n4-76-13C

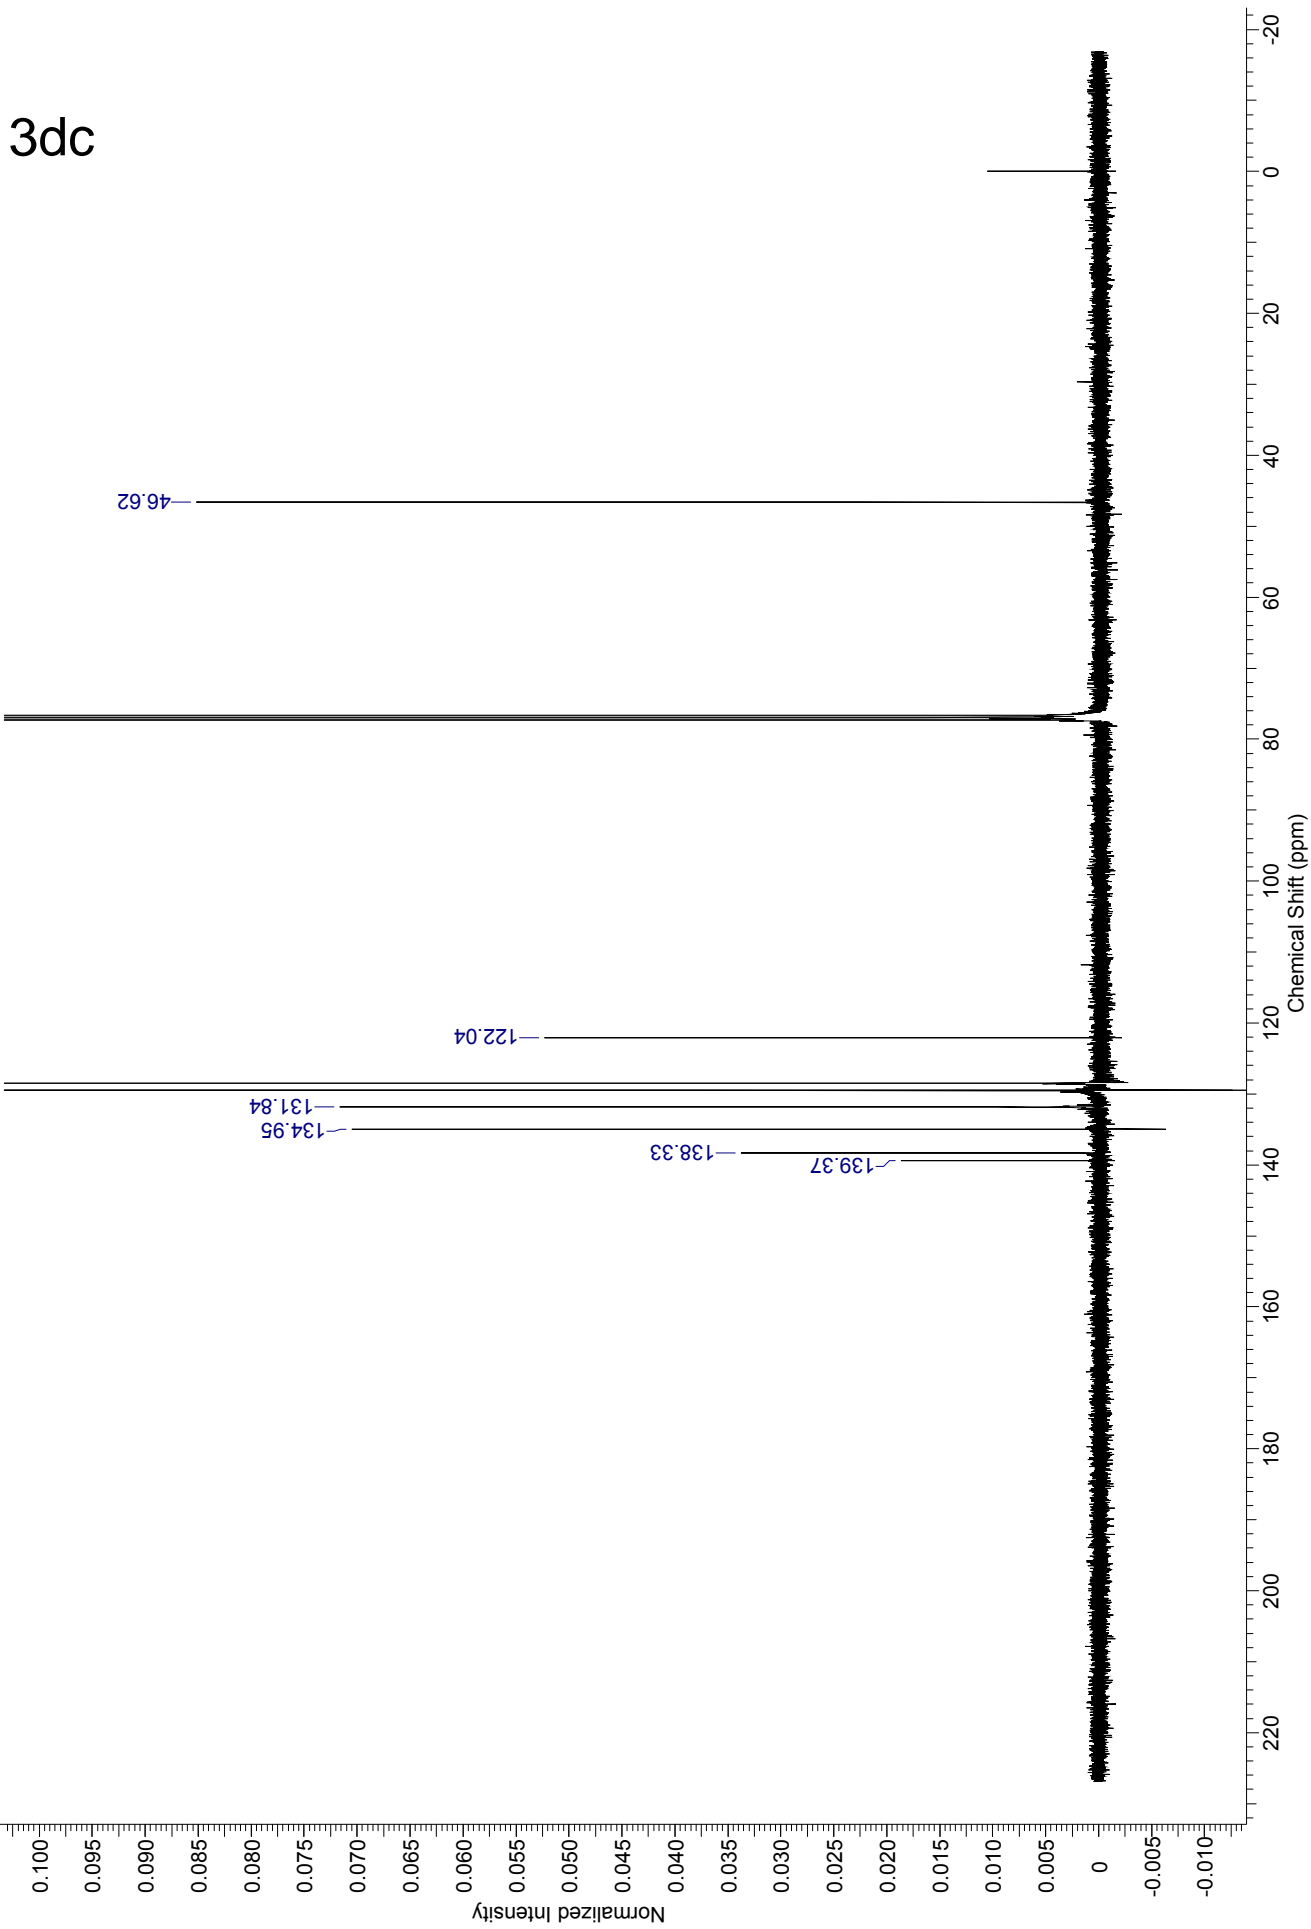

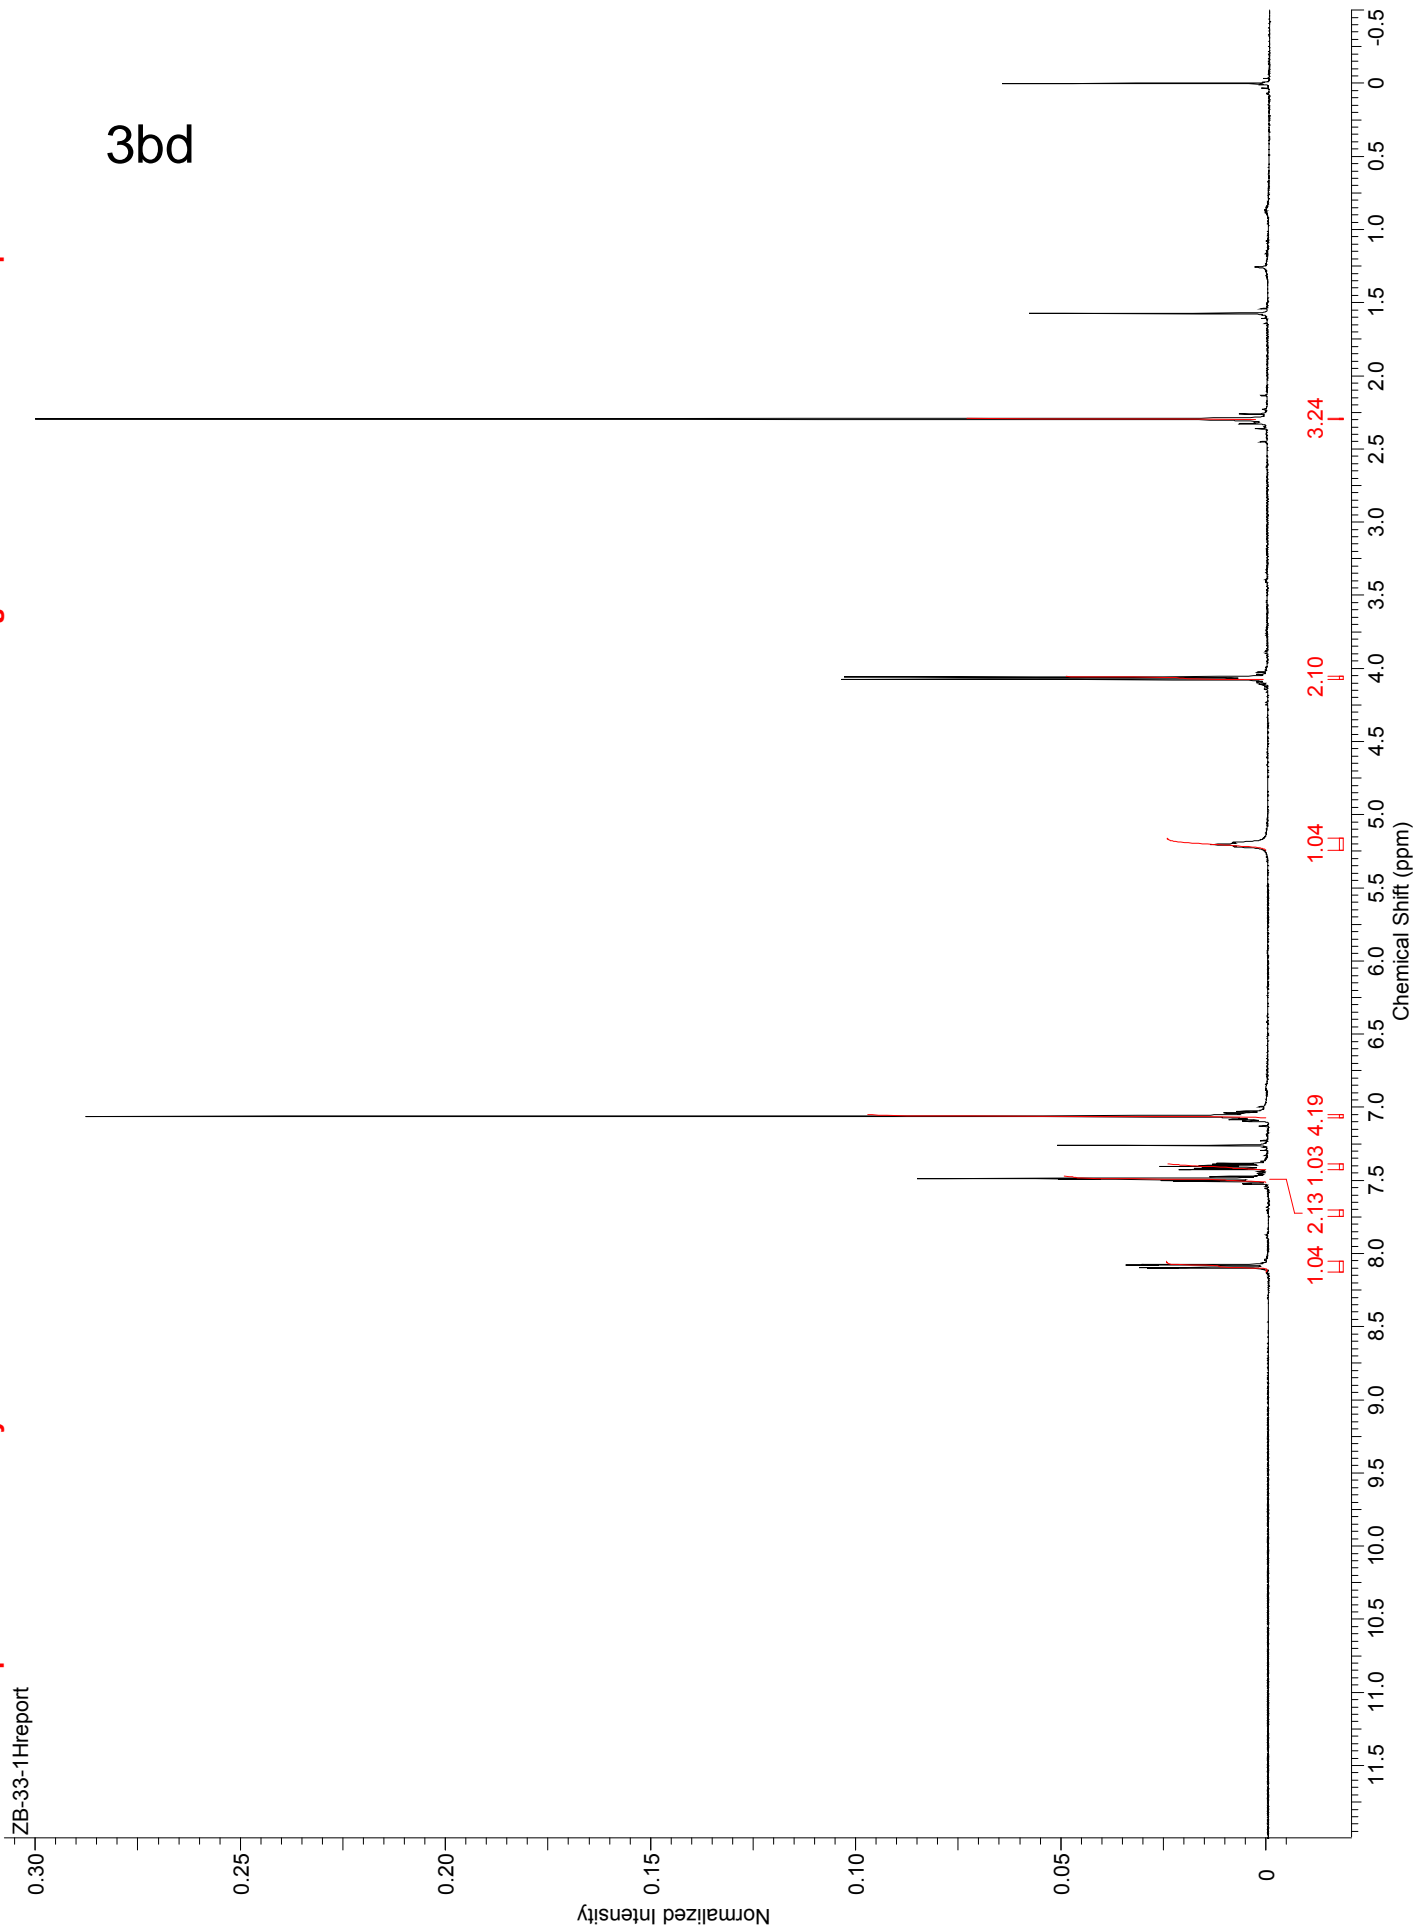

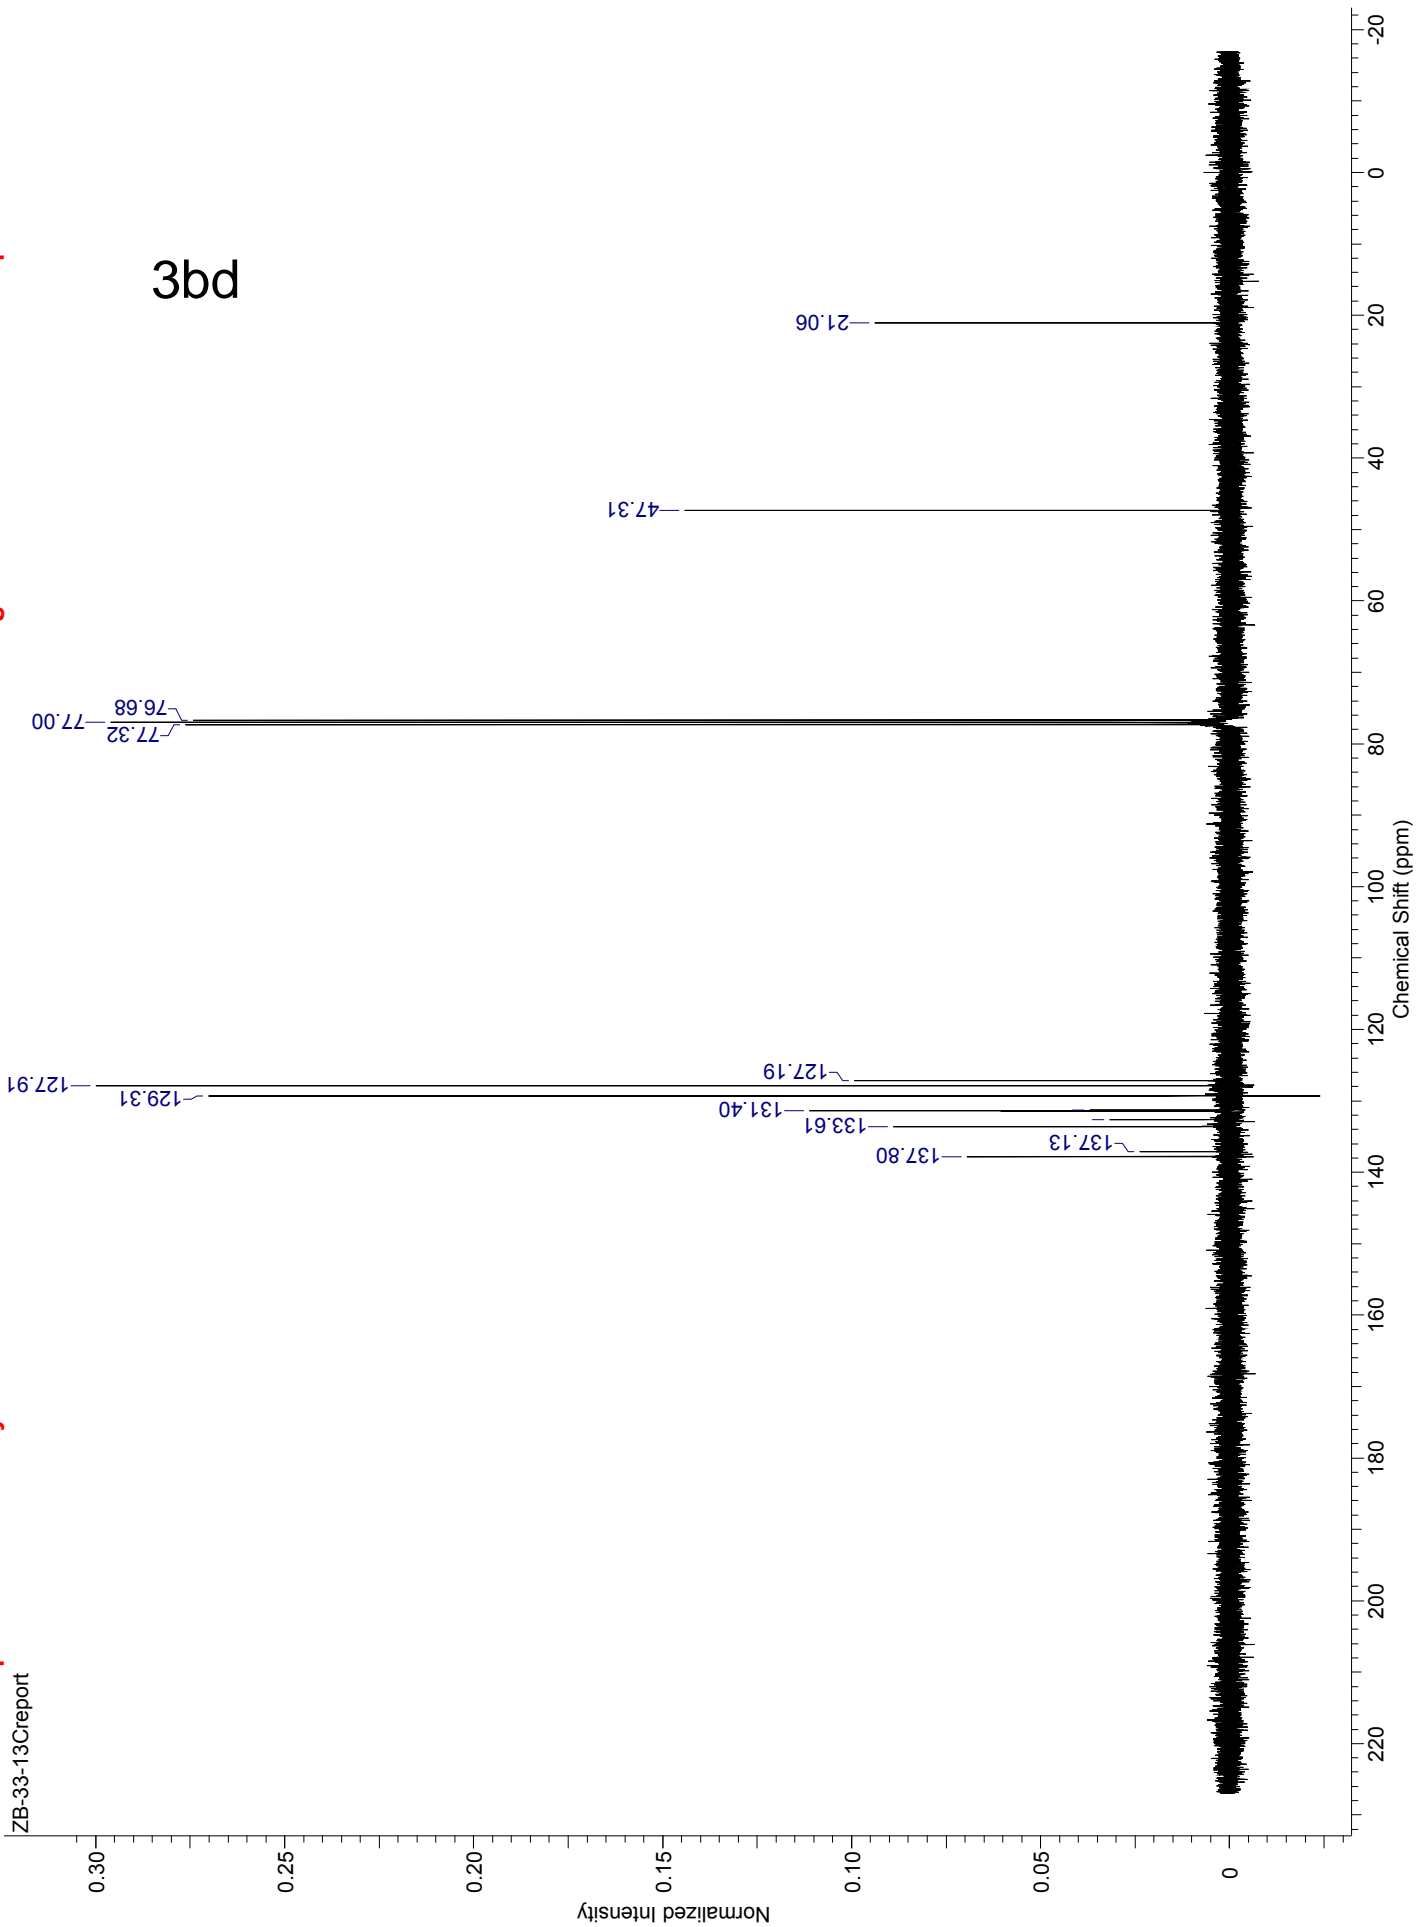

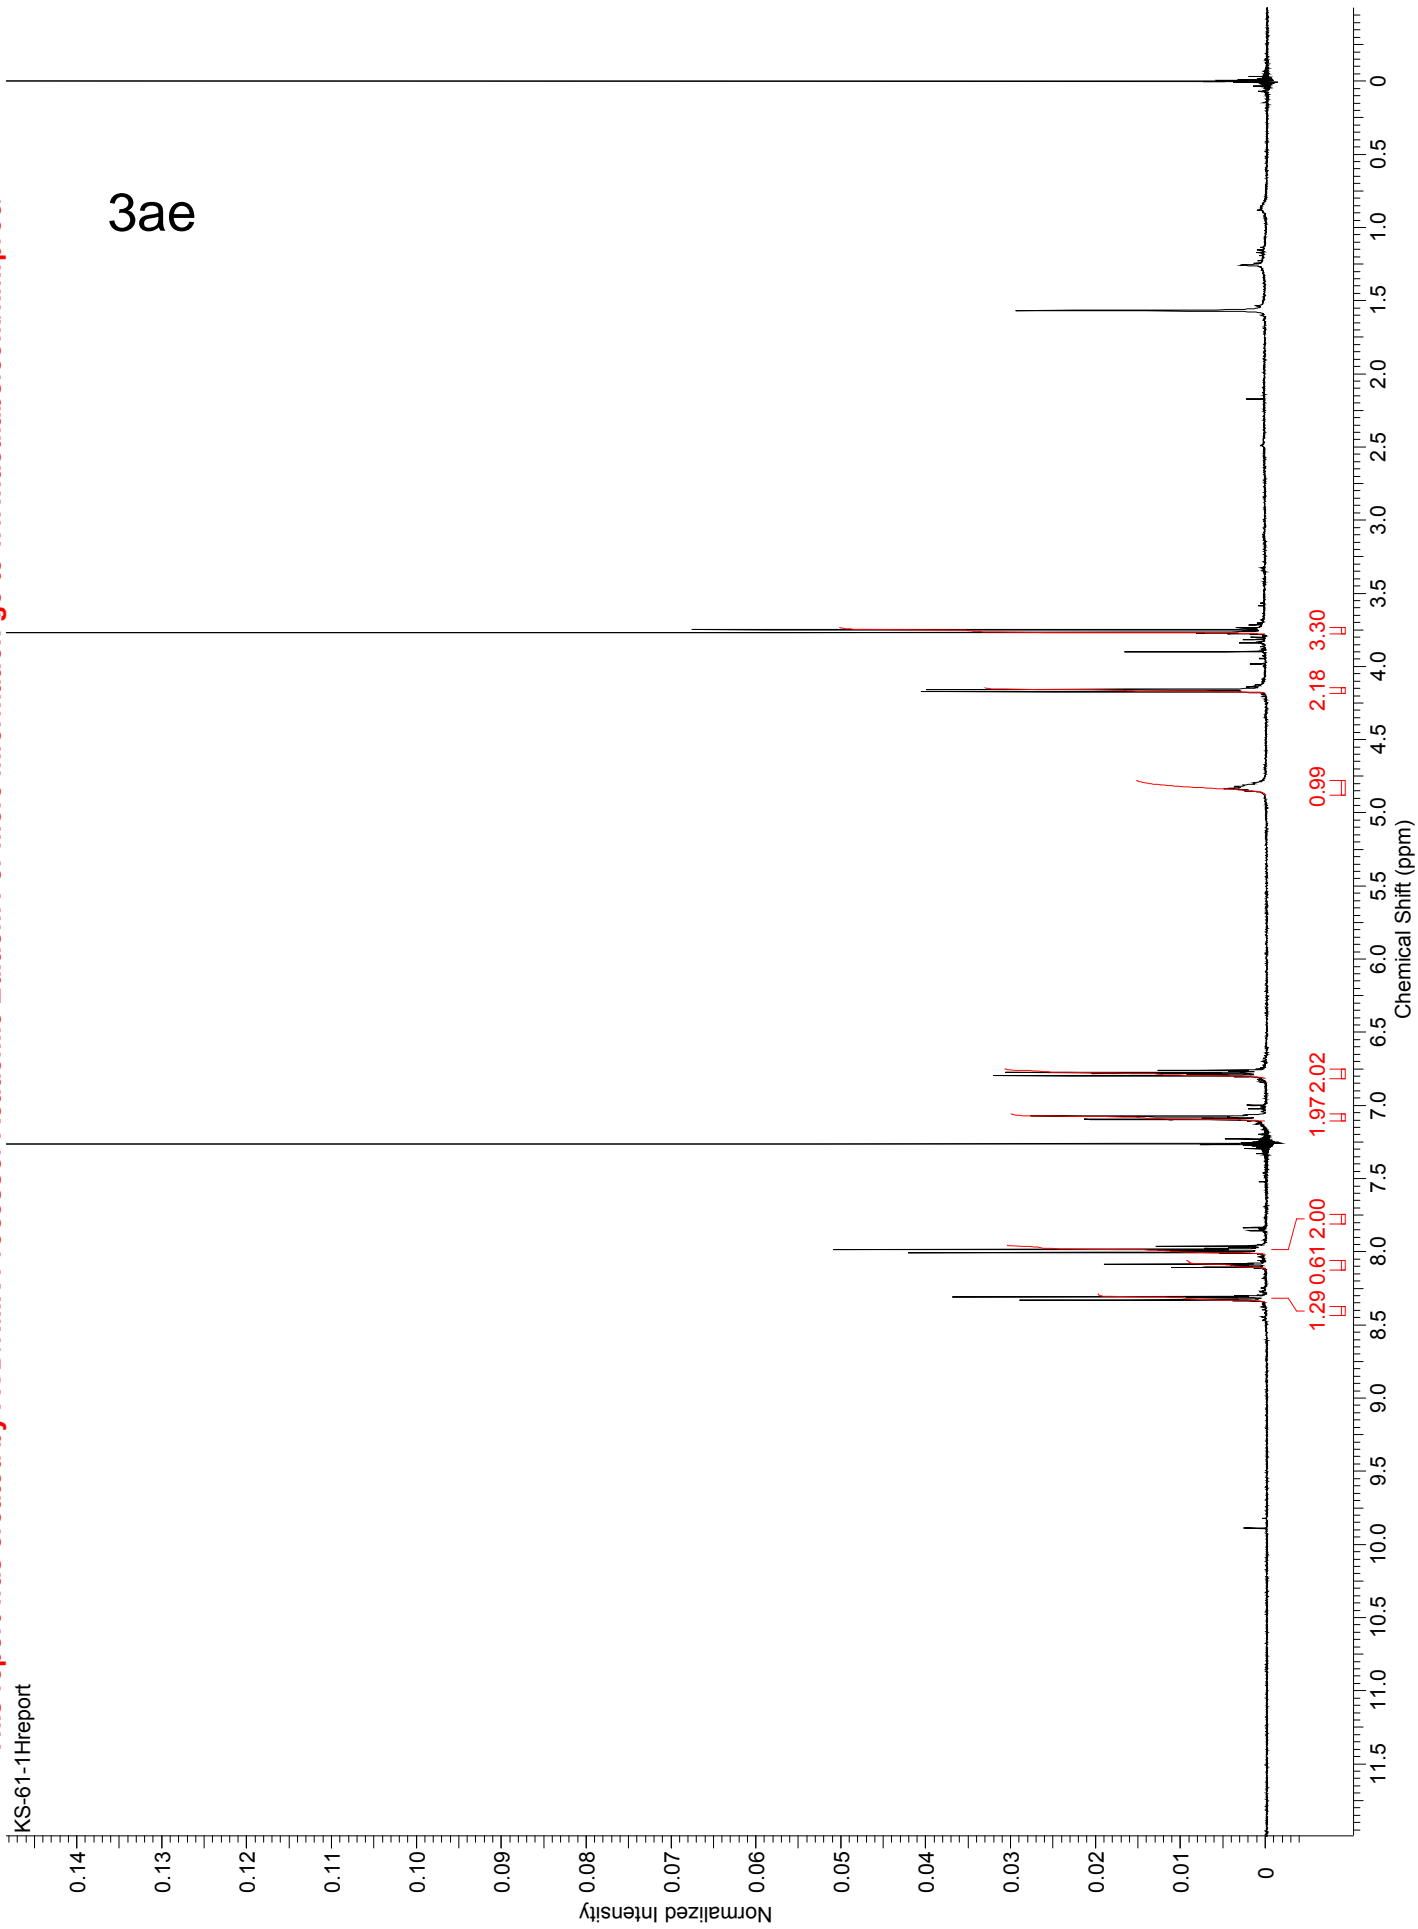

KS-61-13Creport

3ae

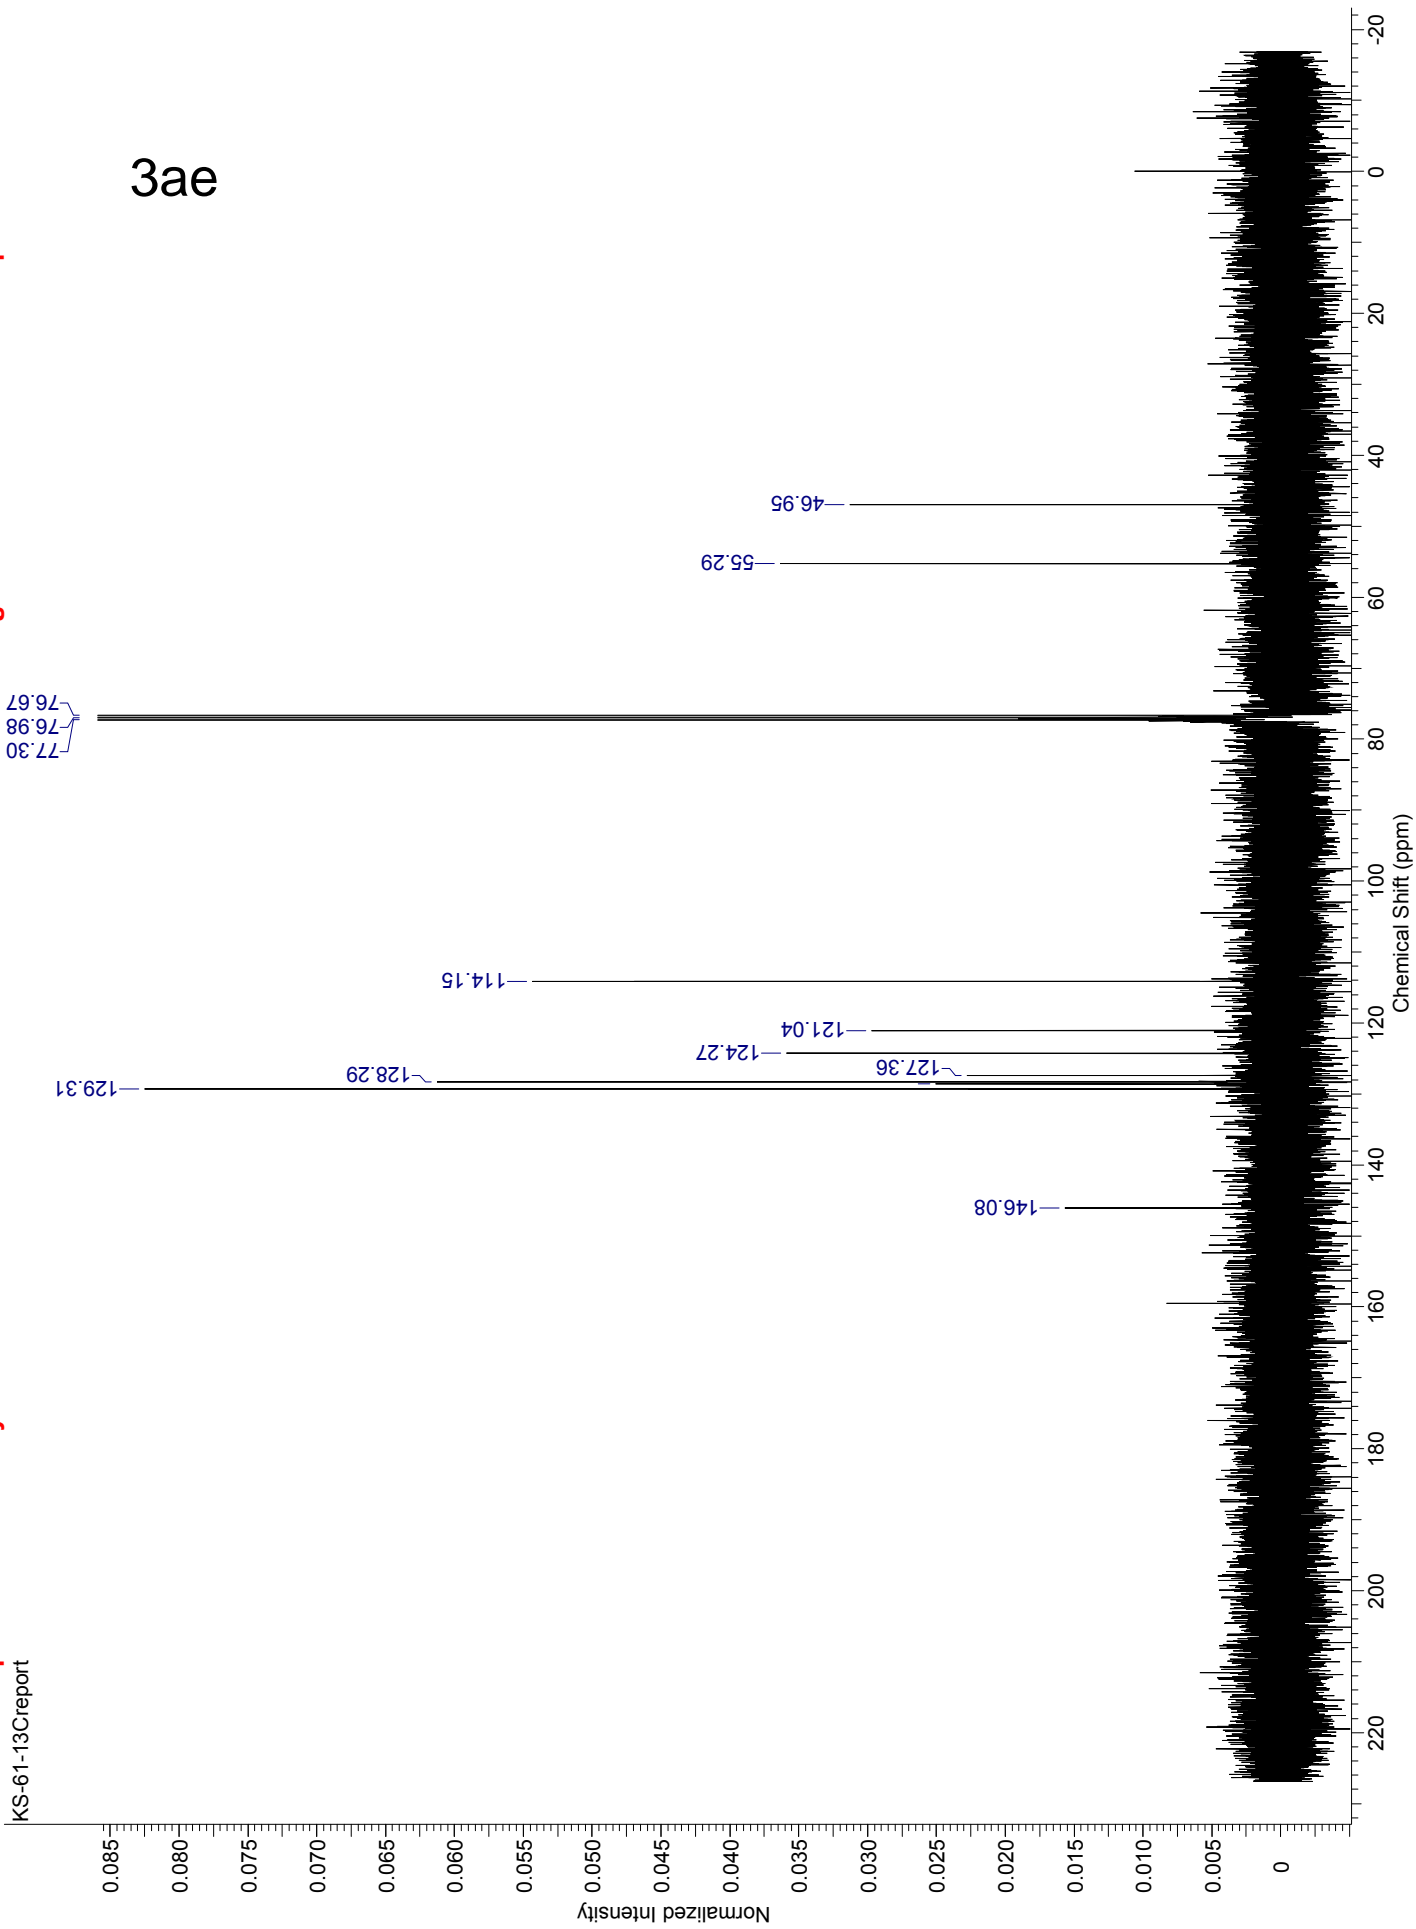

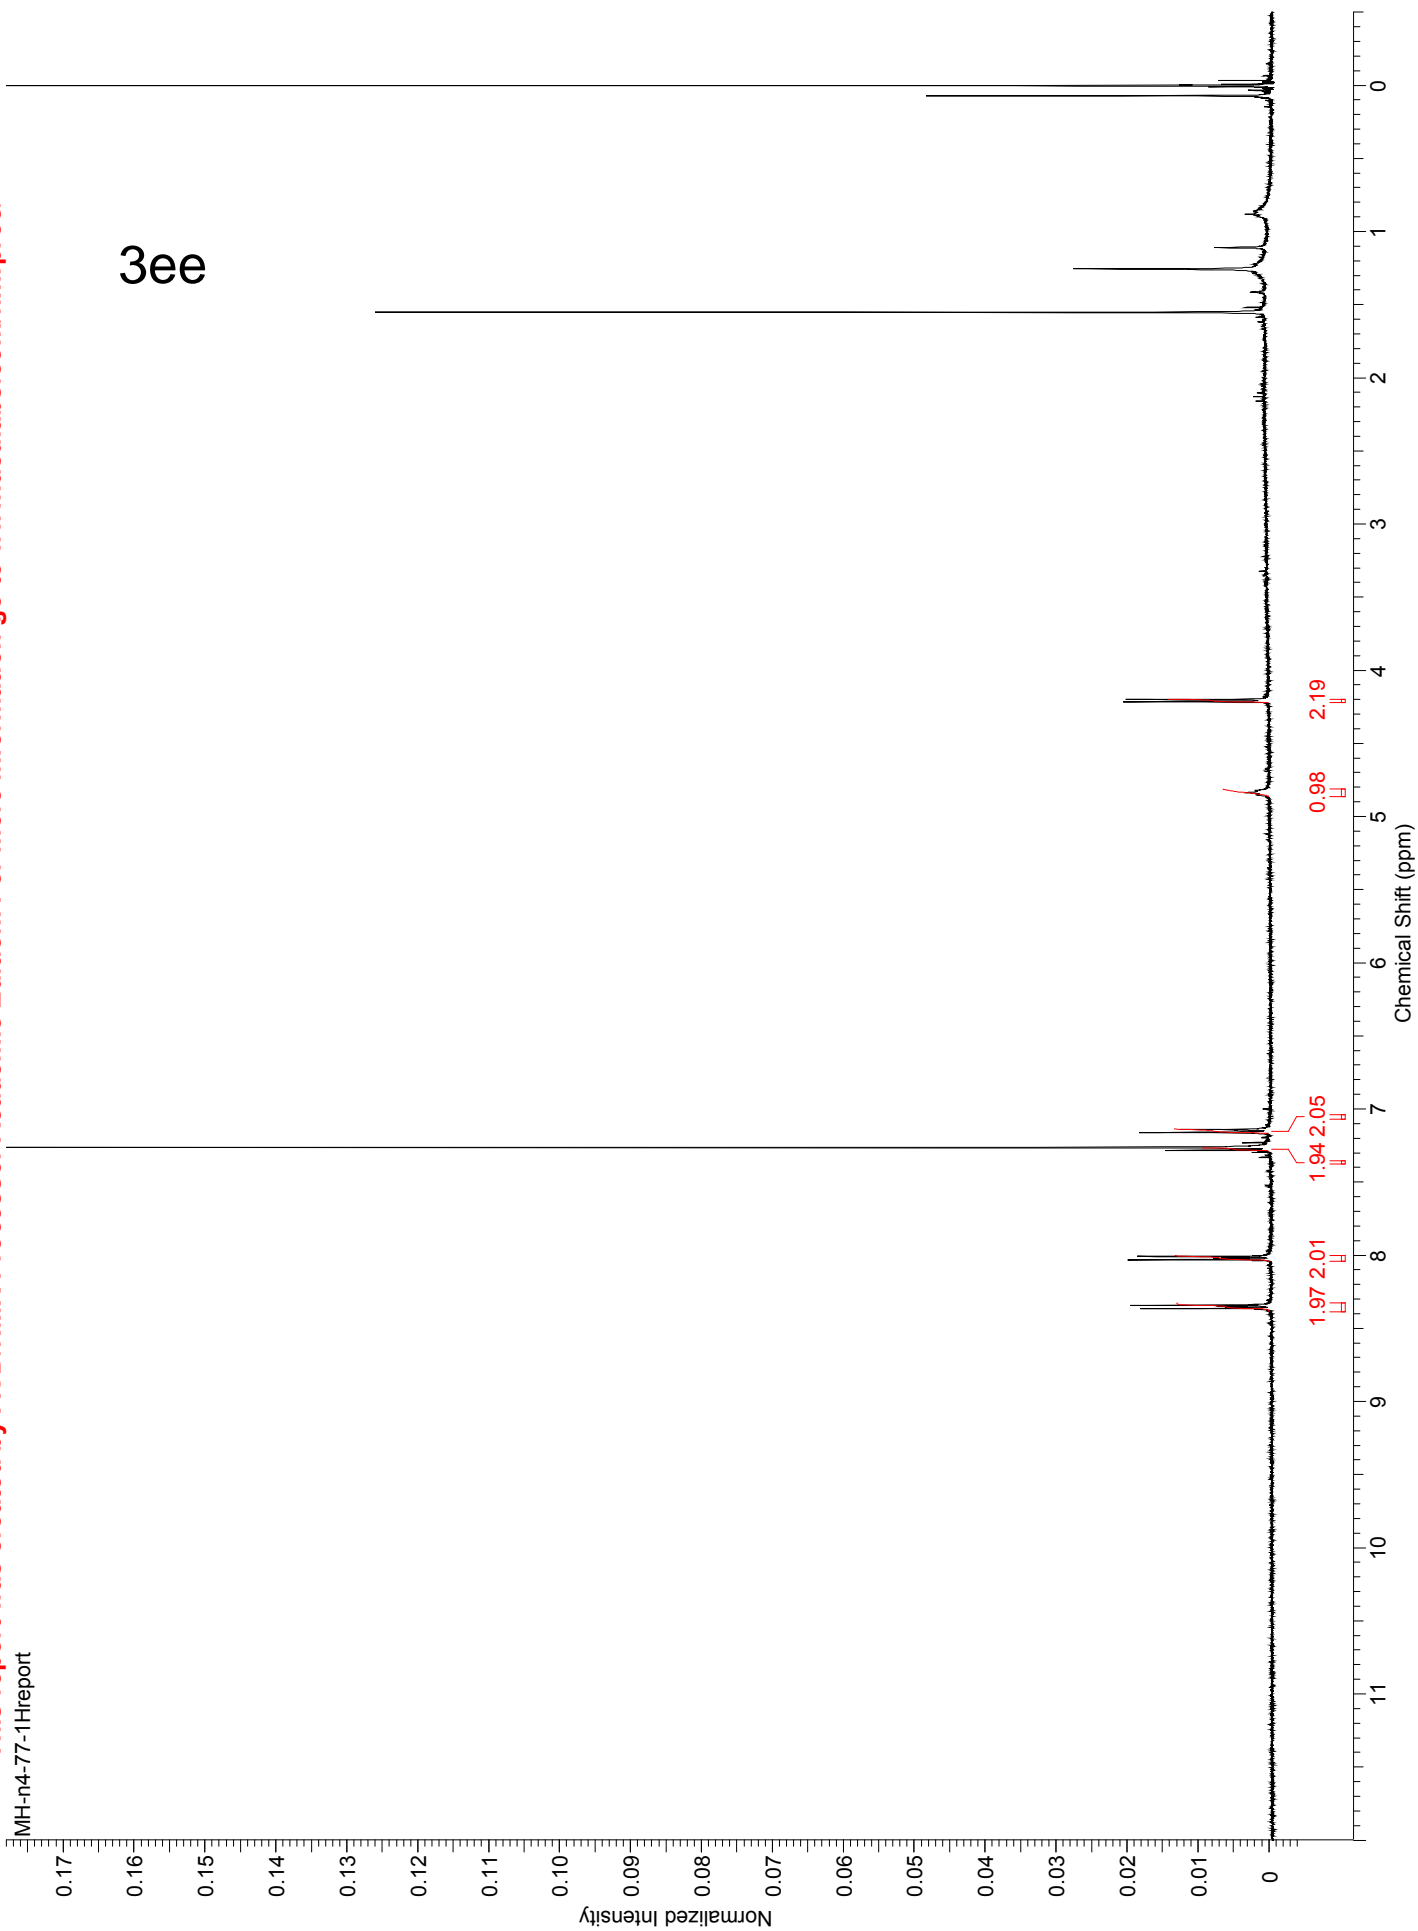



MH-n4-77-13Creport1

3ee

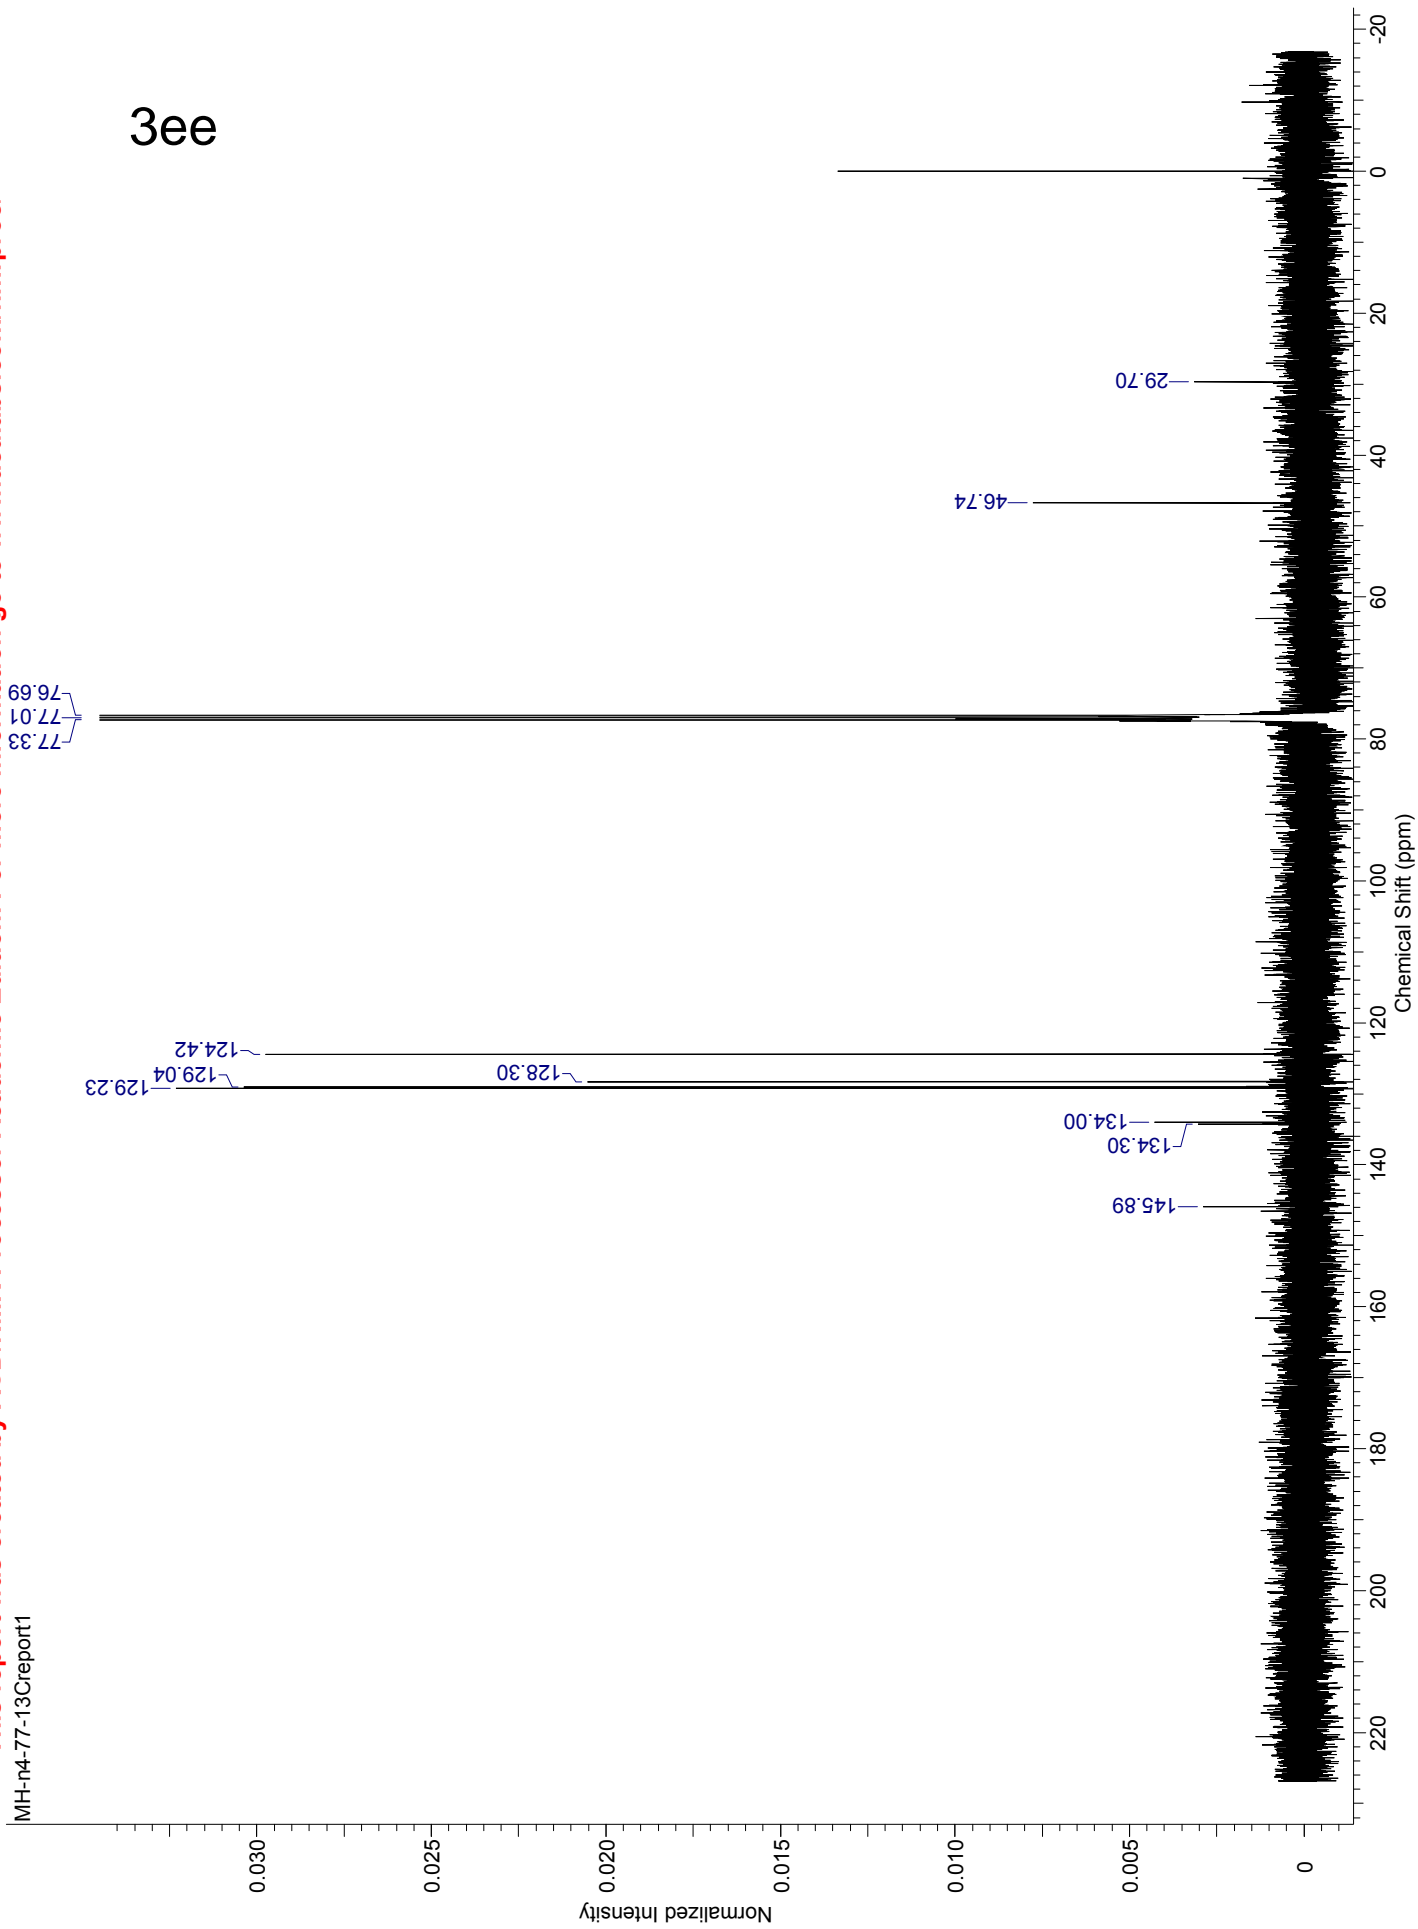

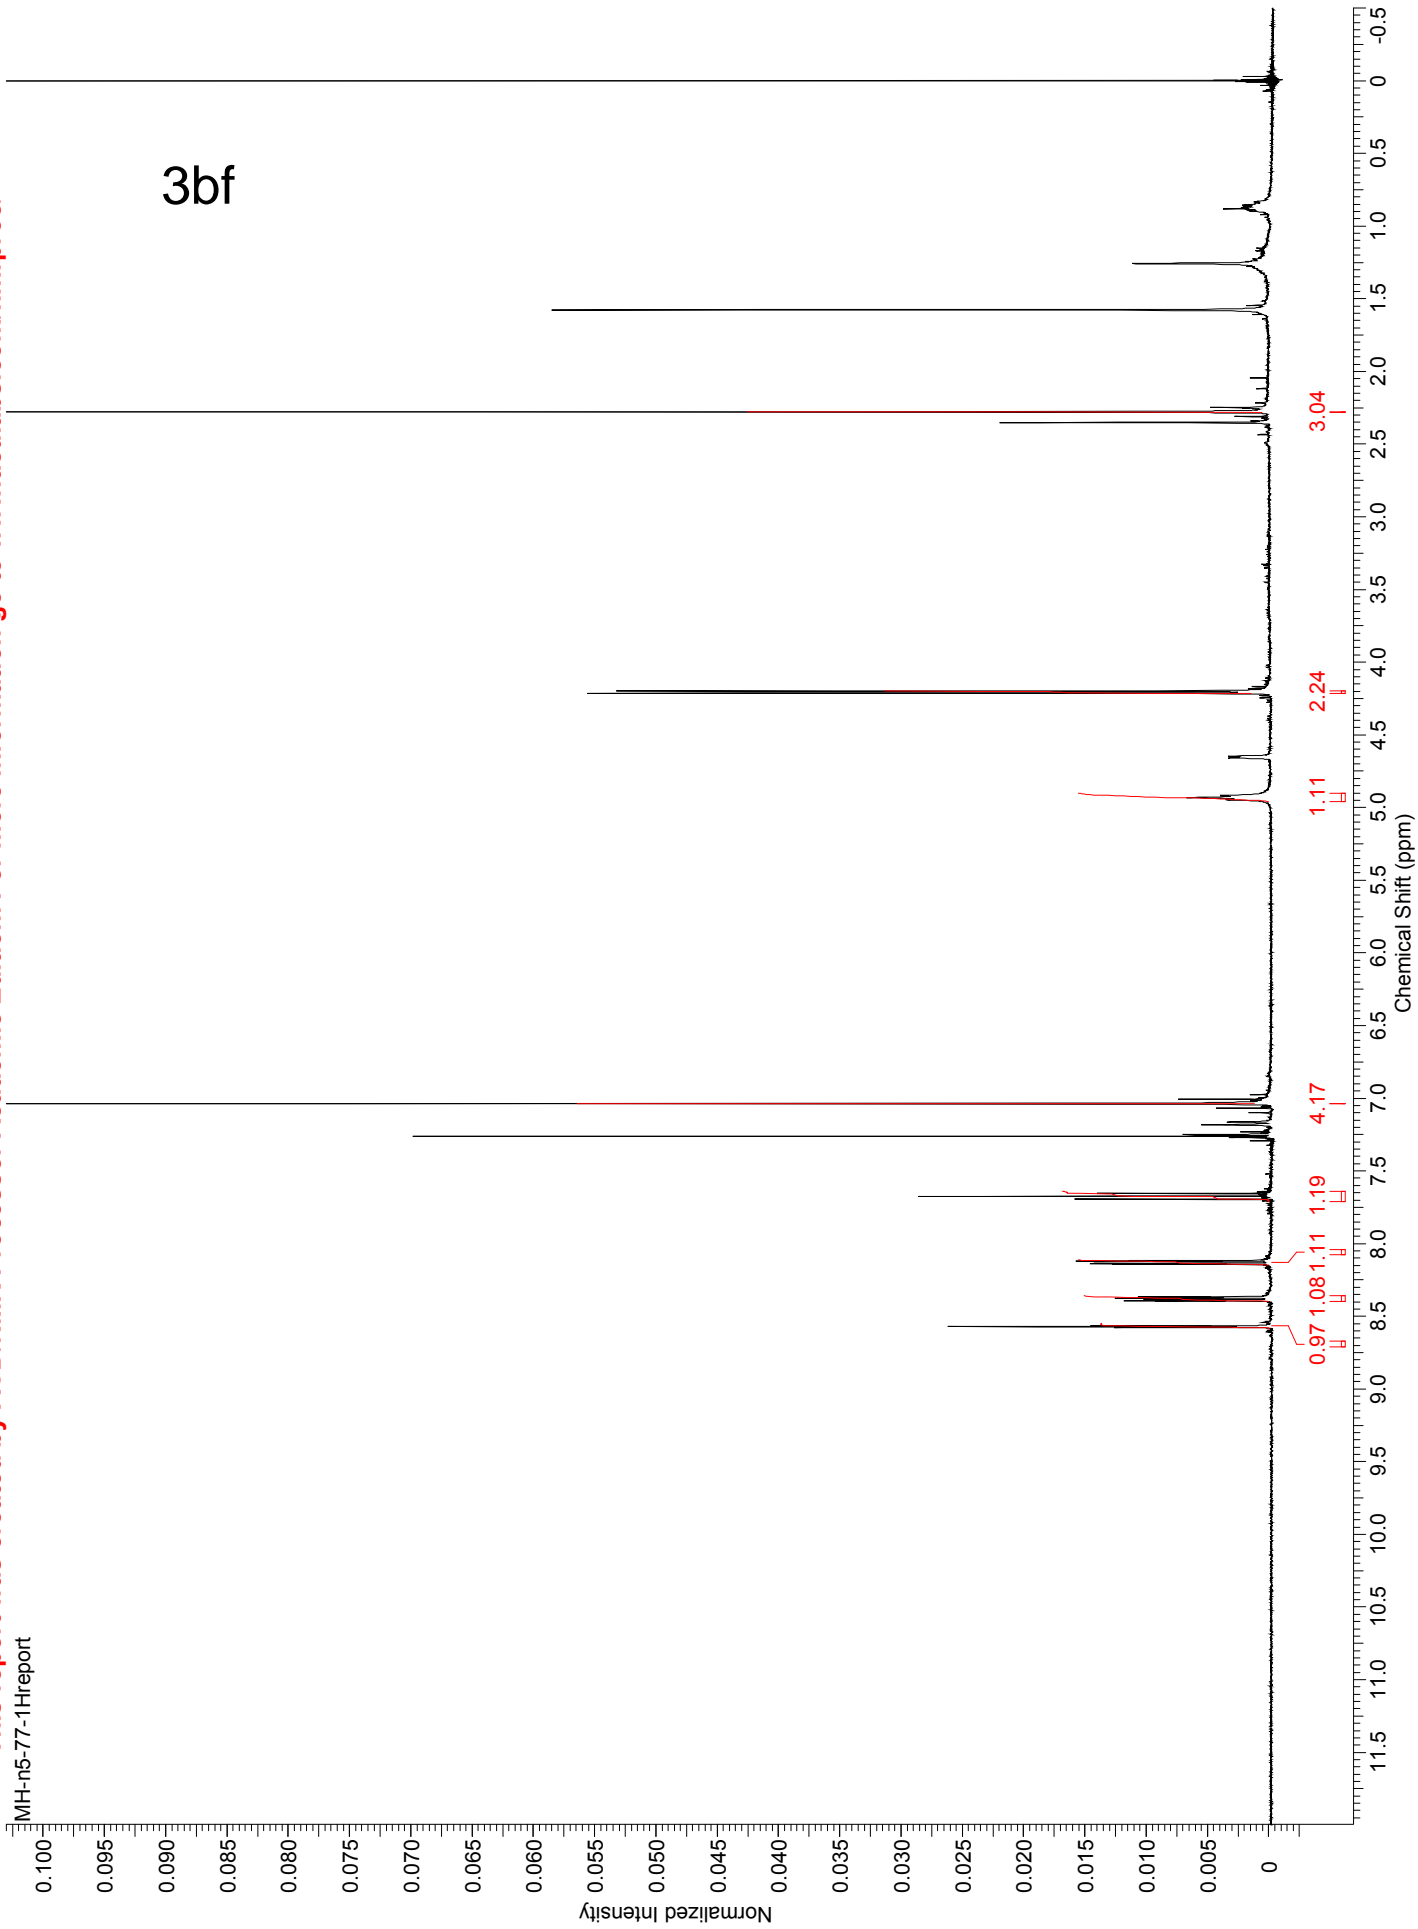

MH-n5-77-13Creport

3bf

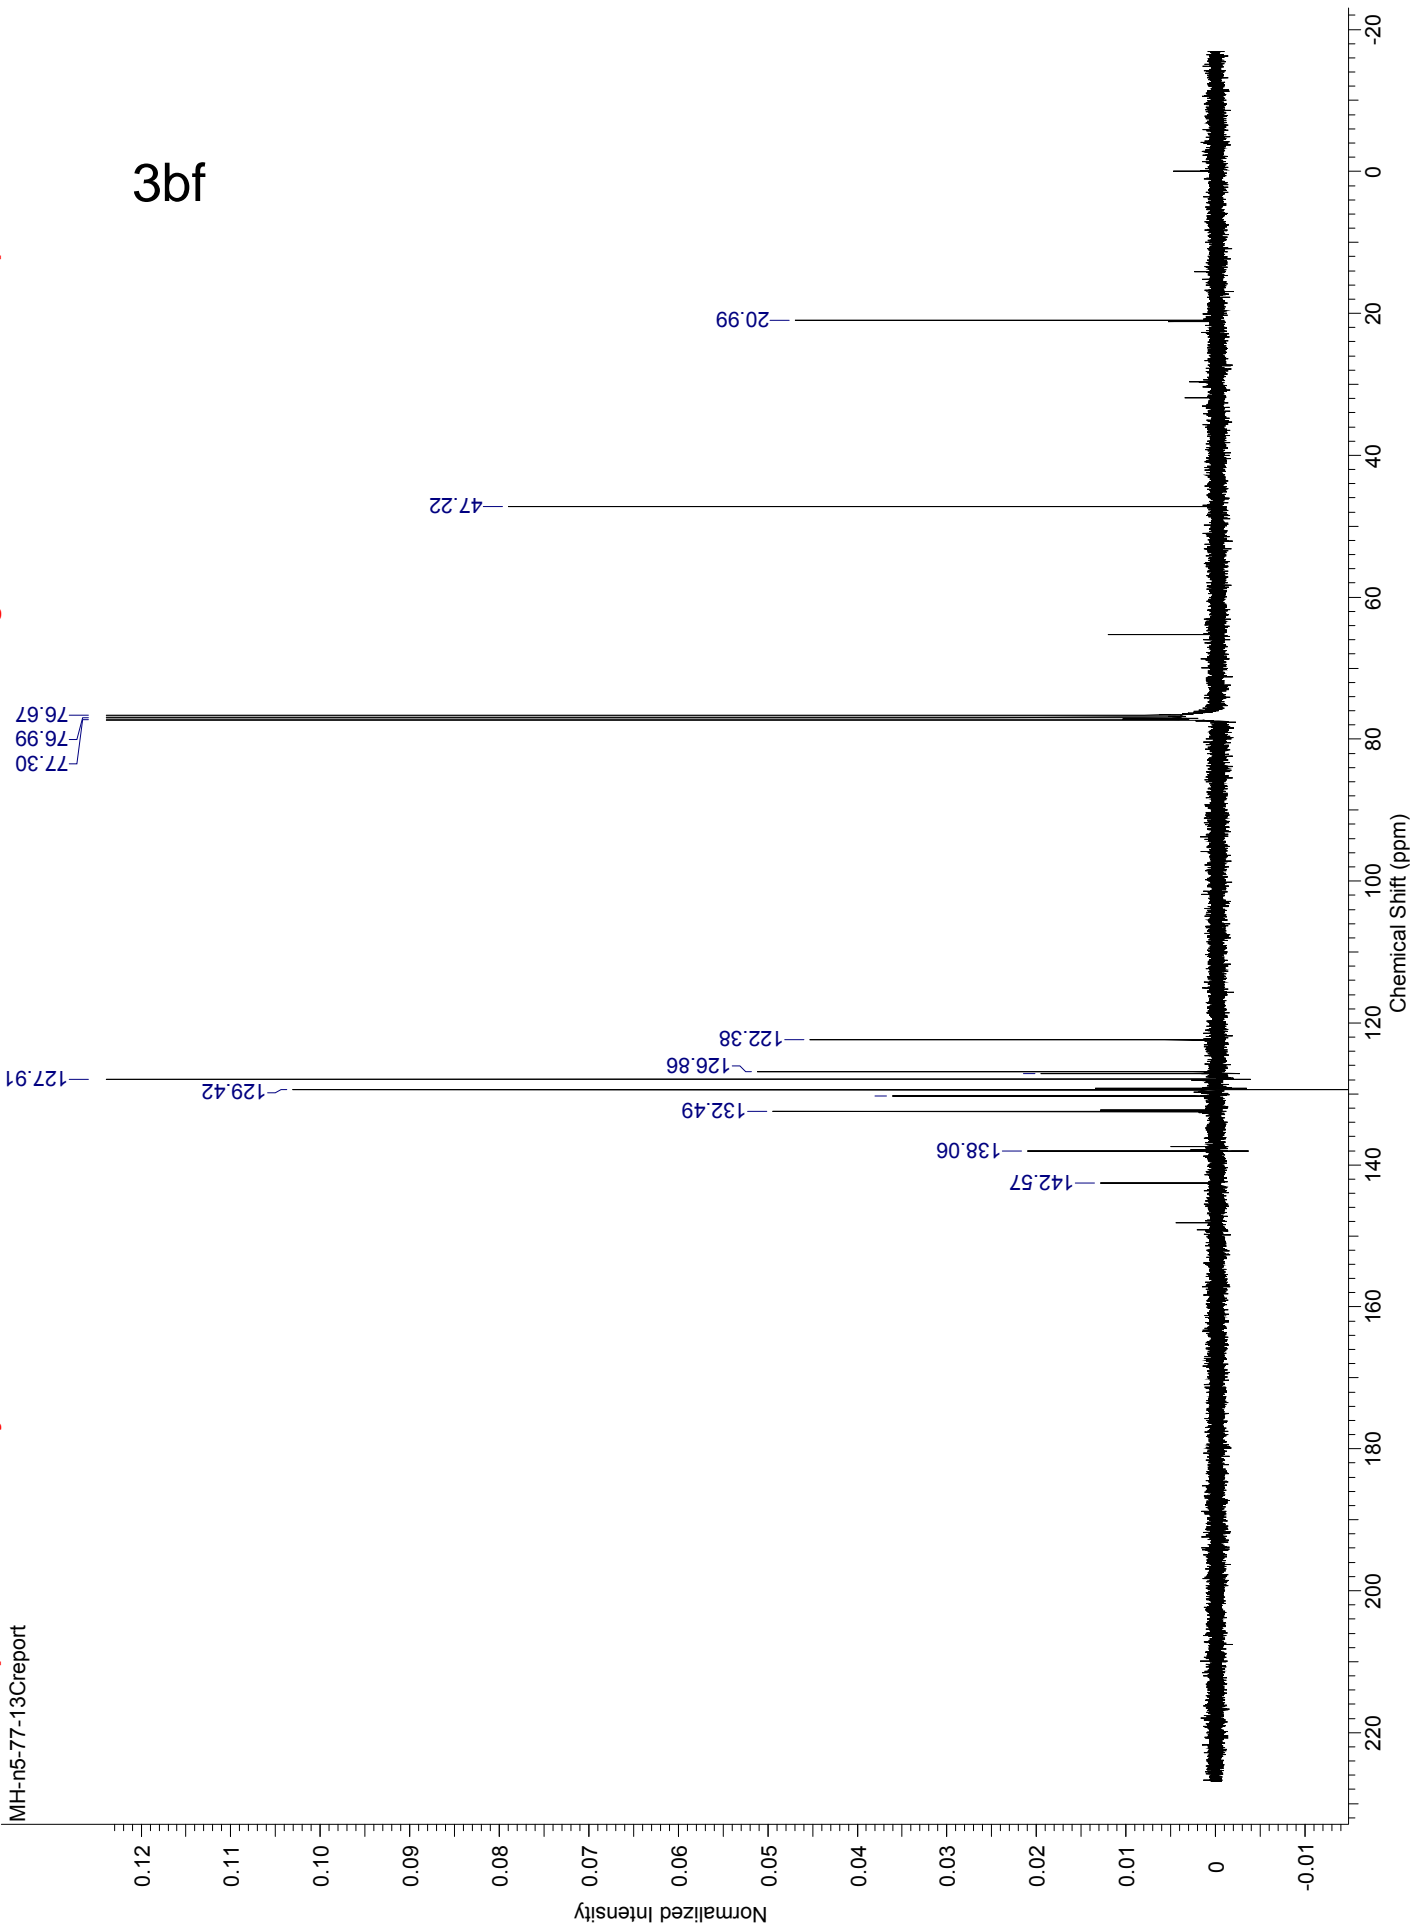

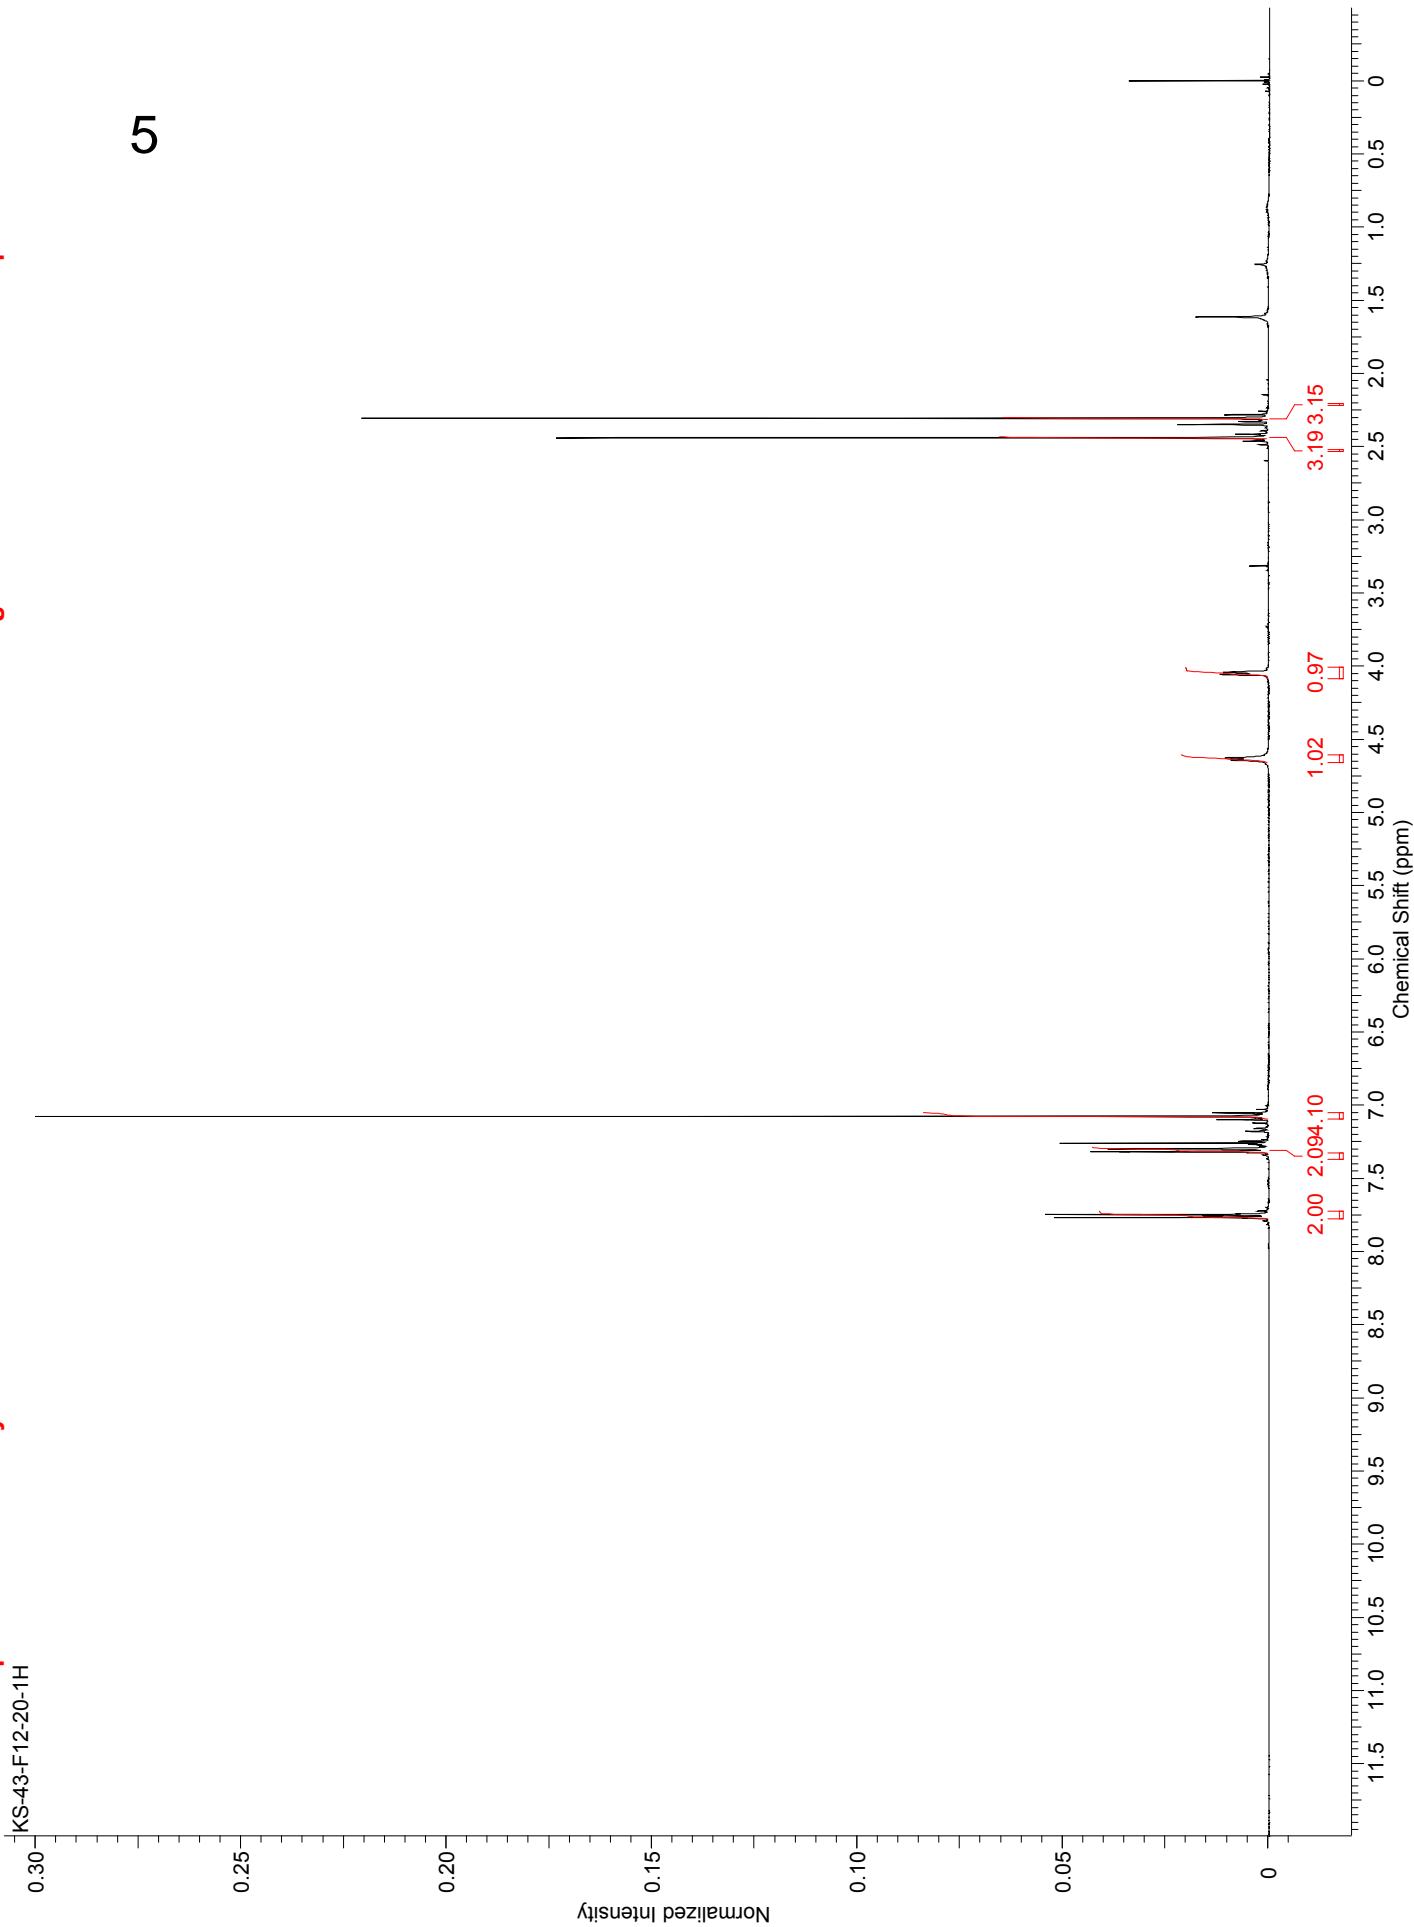

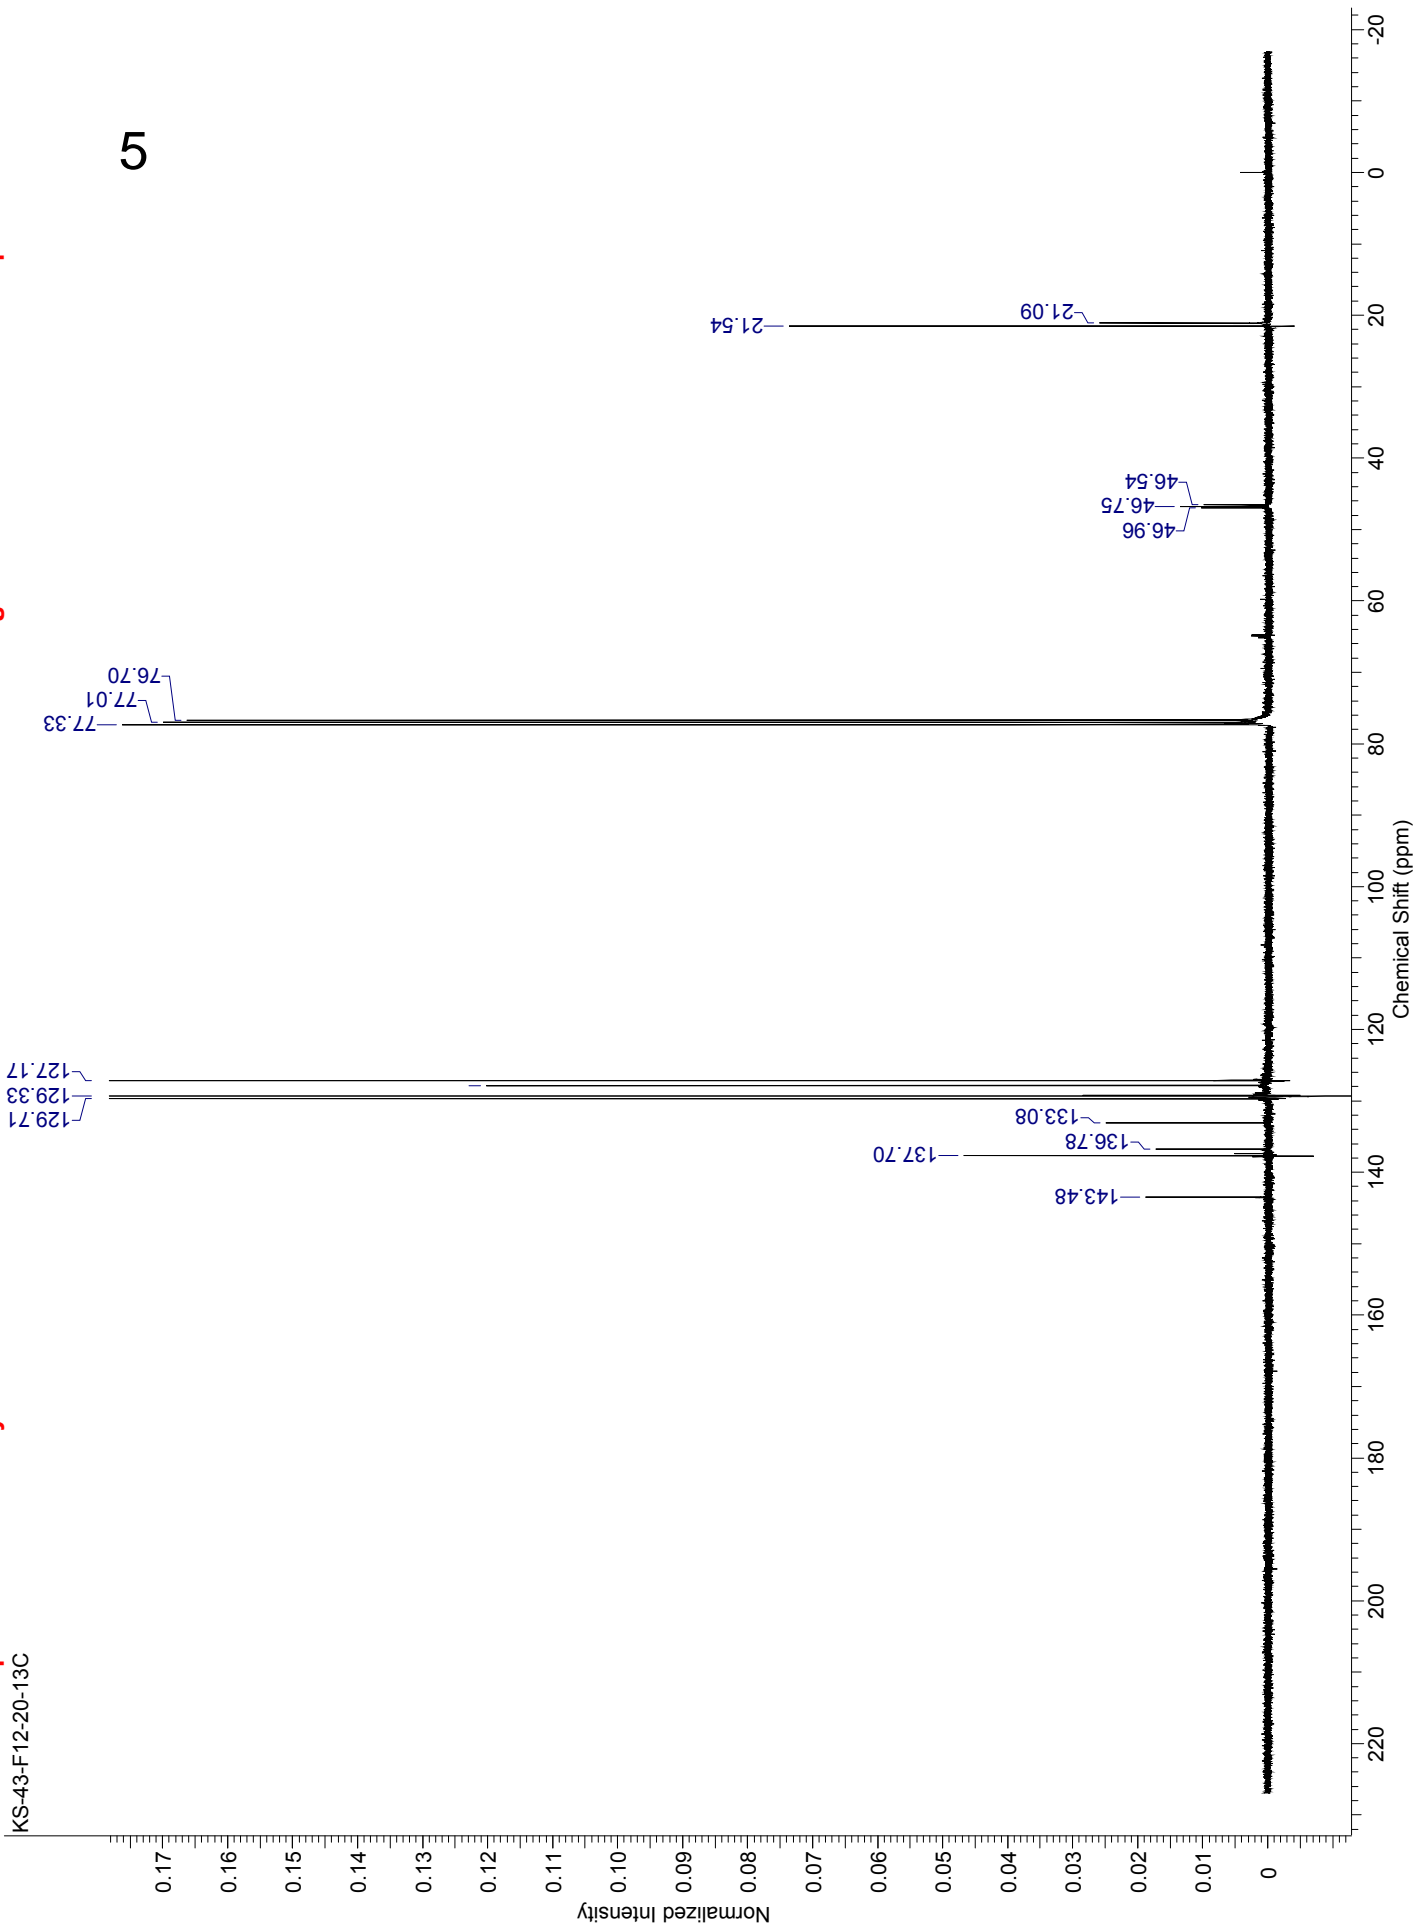

Supplement: molecules-23-01838-s001.pdf [file molecules-23-01838-s001.pdf]
